# Supplementary material for: Shortest-Path Network Analysis Is a Useful Approach toward Identifying Genetic Determinants of Longevity
Source: PubMed Central journal article supplement (PMC2583956; doi:10.1371/journal.pone.0003802), 2008-11-25

**Figure S2. Deletion of *YPT6*, a component of the composite shortest-path longevity network, increases replicative life span.** Replicative life span is plotted for *ypt6Δ* and for experiment-matched wild type (WT) cells. Replicative life span extension was significant in both mating types ( $p < 0.05$ , Wilcoxon Rank-Sum Test). Pooled data from both mating types is shown.

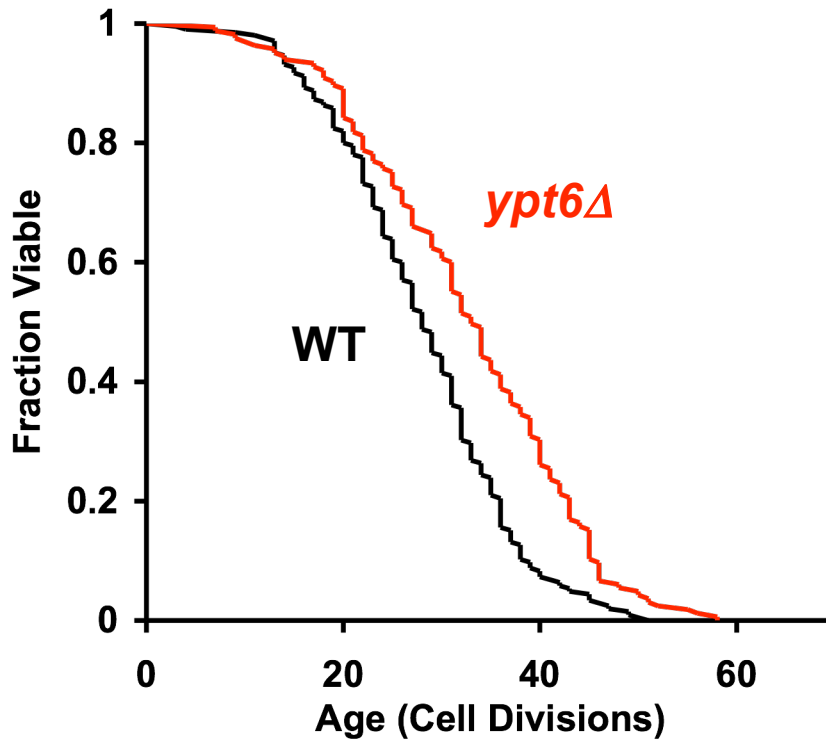

Supplement: pone.0003802.s002.pdf [file pone.0003802.s002.pdf]
