# Supplementary material for: Shortest-Path Network Analysis Is a Useful Approach toward Identifying Genetic Determinants of Longevity
Source: PubMed Central journal article supplement (PMC2583956; doi:10.1371/journal.pone.0003802), 2008-11-25
Supplement: pone.0003802.s003.pdf [file pone.0003802.s003.pdf]

**Table S1. Set of yeast genes reported to be associated with increased replicative life span used to construct the shortest-path longevity network.** This list was derived from the our Aging Genes/Interventions Database (formerly the SAGE KE Genes/Interventions Database [1]; <http://www.kaeberleinlab.org/ageid>) and from independent literature searches.

| ORF     | GENE    | EFFECT ON RLS                              | REFERENCE |
|---------|---------|--------------------------------------------|-----------|
| YNR051C | BRE5    | Deletion increases RLS                     | [2]       |
| YLR310C | CDC25   | Point mutation increases RLS               | [3]       |
| YJL194W | CDC6    | Deletion increases RLS                     | [4]       |
| YJL005W | CYR1    | Point mutation increases RLS               | [3]       |
| YDR110W | FOB1    | Deletion increases RLS                     | [5]       |
| YER020W | GPA2    | Deletion increases RLS                     | [3]       |
| YDL035C | GPR1    | Deletion increases RLS                     | [3]       |
| YKL109W | HAP4    | Overexpression increases RLS               | [3]       |
| YGL253W | HXK2    | Deletion increases RLS                     | [3]       |
| YOR136W | IDH2    | Deletion increases RLS                     | [2]       |
| YHL003C | LAG1    | Deletion or overexpression increases RLS   | [6]       |
| YOL025W | LAG2    | Deletion increases RLS                     | [7]       |
| YGL178W | MPT5    | Overexpression increases RLS               | [8]       |
| YPR030W | MRG19   | Deletion increases RLS                     | [9]       |
| YLR285W | NNT1    | Overexpression increases RLS               | [10]      |
| YOR209C | NPT1    | Overexpression increases RLS               | [11]      |
| YGL037C | PNC1    | Overexpression increases RLS               | [10]      |
| YOR101W | RAS1    | Deletion increases RLS                     | [12]      |
| YNL0986 | RAS2    | Overexpression increases RLS               | [12]      |
| YBR267W | REI1    | Deletion increases RLS                     | [2]       |
| YLR371W | ROM2    | Deletion increases RLS                     | [2]       |
| YNL330C | RPD3    | Deletion increases RLS                     | [13]      |
| YDL075W | RPL31A  | Deletion increases RLS                     | [2]       |
| YLR448W | RPL6B   | Deletion increases RLS                     | [2]       |
| YBL103C | RTG3    | Deletion increases RLS                     | [14]      |
| YHR205W | SCH9    | Deletion increases RLS                     | [15]      |
| YOR367W | SCP1    | Deletion increases RLS                     | [16]      |
| YDL042C | SIR2    | Overexpression increases RLS               | [17]      |
| YDR227W | SIR4    | Semi-dominant Sir4-42 allele increases RLS | [18]      |
| YGL115W | SNF4    | Deletion increases RLS                     | [19]      |
| YDR293C | SSD1    | SSD1-V allele increases RLS                | [20]      |
| YJR066W | TOR1    | Deletion increases RLS                     | [2]       |
| YPL203W | TPK2    | Point mutation increases RLS               | [3]       |
| YNL229C | URE2    | Deletion increases RLS                     | [2]       |
| YKR042W | UTH1    | Deletion increases RLS                     | [18]      |
| YBR238C | YBR238C | Deletion increases RLS                     | [2]       |
| YBR255W | YBR255W | Deletion increases RLS                     | [2]       |
| YBR266C | YBR266C | Deletion increases RLS                     | [2]       |
| YOR135C | YOR135C | Deletion increases RLS                     | [2]       |
| YMR273C | ZDS1    | Deletion increases RLS                     | [21]      |

## References

1. Kaerberlein M, Jegalian B, McVey M (2002) AGEID: a database of aging genes and interventions. *Mech Ageing Dev* 123: 1115-1119.
2. Kaerberlein M, Powers RW, 3rd, Steffen KK, Westman EA, Hu D, et al. (2005) Regulation of yeast replicative life span by TOR and Sch9 in response to nutrients. *Science* 310: 1193-1196.
3. Lin SJ, Defossez PA, Guarente L (2000) Requirement of NAD and SIR2 for life-span extension by calorie restriction in *Saccharomyces cerevisiae*. *Science* 289: 2126-2128.
4. Sinclair DA, Mills K, Guarente L (1997) Accelerated aging and nucleolar fragmentation in yeast *sgs1* mutants. *Science* 277: 1313-1316.
5. Defossez PA, Prusty R, Kaerberlein M, Lin SJ, Ferrigno P, et al. (1999) Elimination of replication block protein Fob1 extends the life span of yeast mother cells. *Mol Cell* 3: 447-455.
6. D'Mello N P, Childress AM, Franklin DS, Kale SP, Pinswasdi C, et al. (1994) Cloning and characterization of LAG1, a longevity-assurance gene in yeast. *J Biol Chem* 269: 15451-15459.
7. Childress AM, Franklin DS, Pinswasdi C, Kale S (1996) LAG2, a gene that determines yeast longevity. *Microbiology* 142 ( Pt 8): 2289-2297.
8. Kennedy BK, Gotta M, Sinclair DA, Mills K, McNabb DS, et al. (1997) Redistribution of silencing proteins from telomeres to the nucleolus is associated with extension of life span in *S. cerevisiae*. *Cell* 89: 381-391.
9. Kharade SV, Mittal N, Das SP, Sinha P, Roy N (2005) Mrg19 depletion increases *S. cerevisiae* lifespan by augmenting ROS defence. *FEBS Lett* 579: 6809-6813.
10. Anderson RM, Bitterman KJ, Wood JG, Medvedik O, Sinclair DA (2003) Nicotinamide and PNC1 govern lifespan extension by calorie restriction in *Saccharomyces cerevisiae*. *Nature* 423: 181-185.
11. Anderson RM, Bitterman KJ, Wood JG, Medvedik O, Cohen H, et al. (2002) Manipulation of a nuclear NAD<sup>+</sup> salvage pathway delays aging without altering steady-state NAD<sup>+</sup> levels. *J Biol Chem* 277: 18881-18890.
12. Sun J, Kale SP, Childress AM, Pinswasdi C, Jazwinski SM (1994) Divergent roles of RAS1 and RAS2 in yeast longevity. *J Biol Chem* 269: 18638-18645.
13. Kim S, Benguria A, Lai CY, Jazwinski SM (1999) Modulation of life-span by histone deacetylase genes in *Saccharomyces cerevisiae*. *Mol Biol Cell* 10: 3125-3136.
14. Kirchman PA, Kim S, Lai CY, Jazwinski SM (1999) Interorganelle signaling is a determinant of longevity in *Saccharomyces cerevisiae*. *Genetics* 152: 179-190.
15. Fabrizio P, Liou LL, Moy VN, Diaspro A, SelverstoneValentine J, et al. (2003) SOD2 functions downstream of Sch9 to extend longevity in yeast. *Genetics* 163: 35-46.
16. Gourlay CW, Carpp LN, Timpson P, Winder SJ, Ayscough KR (2004) A role for the actin cytoskeleton in cell death and aging in yeast. *J Cell Biol* 164: 803-809.
17. Kaerberlein M, McVey M, Guarente L (1999) The SIR2/3/4 complex and SIR2 alone promote longevity in *Saccharomyces cerevisiae* by two different mechanisms. *Genes Dev* 13: 2570-2580.

18. Kennedy BK, Austriaco NR, Zhang J, Guarente L (1995) Mutation in the silencing gene SIR4 can delay aging in *S. cerevisiae*. *Cell* 80: 485-496.
19. Ashrafi K, Lin SS, Manchester JK, Gordon JI (2000) Sip2p and its partner snf1p kinase affect aging in *S. cerevisiae*. *Genes Dev* 14: 1872-1885.
20. Kaeberlein M, Andalis AA, Liszt G, Fink GR, Guarente L (2004) *Saccharomyces cerevisiae* SSD1-V confers longevity by a Sir2p-independent mechanism. *Genetics* 166: 1661-1672.
21. Roy N, Runge KW (2000) Two paralogs involved in transcriptional silencing that antagonistically control yeast life span. *Curr Biol* 10: 111-114.
