# Supplementary material for: Shortest-Path Network Analysis Is a Useful Approach toward Identifying Genetic Determinants of Longevity
Source: PubMed Central journal article supplement (PMC2583956; doi:10.1371/journal.pone.0003802), 2008-11-25
Supplement: pone.0003802.s004.pdf [file pone.0003802.s004.pdf]

**Table S2. Relation table for the composite shortest path longevity network.**

| <b>TYPE</b> | <b>RELATION</b>   |
|-------------|-------------------|
| Binding     | ARP3 ---- NOG2    |
| Binding     | ACT1 ---- CYR1    |
| Binding     | NMD3 ---- REI1    |
| Binding     | GFA1 ---- RAD51   |
| Binding     | KAP123 ---- RAD51 |
| Binding     | RAD51 ---- YHB1   |
| Binding     | ACT1 ---- RNA14   |
| Binding     | HOS2 ---- TOP1    |
| Binding     | GFA1 ---- RPN10   |
| Binding     | SLA1 ---- YSC84   |
| Binding     | BMH1 ---- SNF4    |
| Binding     | GAL83 ---- SNF4   |
| Binding     | BOI1 ---- YBR238C |
| Binding     | GFA1 ---- YBR238C |
| Binding     | ARX1 ---- REI1    |
| Binding     | HOS2 ---- ZDS1    |
| Binding     | CSR2 ---- WHI2    |
| Binding     | ARP2 ---- SPS1    |
| Binding     | ABP1 ---- SCP1    |
| Binding     | SIP2 ---- SNF4    |
| Binding     | IDH2 ---- SIP2    |
| Binding     | ARP2 ---- GFA1    |
| Binding     | BMH2 ---- CSR2    |
| Binding     | BMH1 ---- CSR2    |
| Binding     | NNT1 ---- TMA19   |
| Binding     | CYT2 ---- NNT1    |
| Binding     | FOB1 ---- IOC2    |
| Binding     | EFT2 ---- RET2    |
| Binding     | MOB1 ---- YBR255W |
| Binding     | JSN1 ---- RPL31B  |
| Binding     | JSN1 ---- SMT3    |
| Binding     | JSN1 ---- NPT1    |
| Binding     | PHD1 ---- SMT3    |
| Binding     | RPL6B ---- SKG6   |
| Binding     | NUP116 ---- SMT3  |
| Binding     | LAG1 ---- NUP116  |
| Binding     | GPA2 ---- NAF1    |
| Binding     | BRE5 ---- UBP3    |
| Binding     | CSR2 ---- PDC6    |
| Binding     | FHL1 ---- SMT3    |
| Binding     | AVT4 ---- LAG1    |
| Binding     | LAG1 ---- SWP1    |
| Binding     | LAG1 ---- SPC1    |
| Binding     | CHS7 ---- LAG1    |
| Binding     | GPI8 ---- LAG1    |
| Binding     | AGP1 ---- LAG1    |
| Binding     | CSG2 ---- LAG1    |
| Binding     | BRE5 ---- SPT5    |
| Binding     | SPT5 ---- TOM1    |

|         |                   |
|---------|-------------------|
| Binding | ACT1 ---- SWR1    |
| Binding | ACT1 ---- TAF14   |
| Binding | ACT1 ---- SWC5    |
| Binding | ACT1 ---- VPS71   |
| Binding | SIR4 ---- UBP3    |
| Binding | CDC25 ---- HSP82  |
| Binding | CDC28 ---- MPT5   |
| Binding | FOB1 ---- SIR2    |
| Binding | SSN3 ---- TUP1    |
| Binding | RAP1 ---- SIR4    |
| Binding | HAP4 ---- SNF5    |
| Binding | HAP4 ---- SWI1    |
| Binding | ARP7 ---- HAP4    |
| Binding | HAP4 ---- TAF14   |
| Binding | CDC25 ---- RAS1   |
| Binding | CDC6 ---- ORC2    |
| Binding | ACT1 ---- RVS167  |
| Binding | SIR2 ---- ZDS1    |
| Binding | SIR4 ---- ZDS1    |
| Binding | ABP1 ---- CLA4    |
| Binding | RVS167 ---- YSC84 |
| Binding | SKG6 ---- ZDS1    |
| Binding | HAP4 ---- TRA1    |
| Binding | TOR1 ---- URE2    |
| Binding | ACT1 ---- HTZ1    |
| Binding | ACT1 ---- YAF9    |
| Binding | SMT3 ---- TUP1    |
| Binding | ACT1 ---- SMT3    |
| Binding | SMT3 ---- TAF14   |
| Binding | RPC82 ---- SMT3   |
| Binding | HSP82 ---- SMT3   |
| Binding | SCS2 ---- SMT3    |
| Binding | SEC27 ---- SMT3   |
| Binding | BNR1 ---- CDC25   |
| Binding | SMT3 ---- TOP1    |
| Binding | SMT3 ---- SNF2    |
| Binding | ELG1 ---- SMT3    |
| Binding | SMT3 ---- STM1    |
| Binding | RAP1 ---- SMT3    |
| Binding | SMT3 ---- TRA1    |
| Binding | SMT3 ---- SNF1    |
| Binding | RTN1 ---- SMT3    |
| Binding | ORM2 ---- SMT3    |
| Binding | PMA1 ---- SMT3    |
| Binding | CYR1 ---- SMT3    |
| Binding | SMT3 ---- YAR010C |
| Binding | SMT3 ---- YBR238C |
| Binding | CDC25 ---- CYR1   |
| Binding | HSP82 ---- RTG3   |
| Binding | HSP82 ---- TOM1   |
| Binding | NSE3 ---- REI1    |
| Binding | NAF1 ---- RPL6B   |
| Binding | ACT1 ---- HSP82   |
| Binding | HSP82 ---- SIR2   |

|         |                     |
|---------|---------------------|
| Binding | HSP82 ---- RAS1     |
| Binding | CLB2 ---- SIR4      |
| Binding | CLB2 ---- CSR2      |
| Binding | CDC28 ---- SIR4     |
| Binding | CDC28 ---- CSR2     |
| Binding | BRE5 ---- GCN2      |
| Binding | RVS167 ---- SPS1    |
| Binding | EFT2 ---- HCA4      |
| Binding | CYR1 ---- YKE2      |
| Binding | SIR4 ---- VPS71     |
| Binding | GFA1 ---- URE2      |
| Binding | BRE5 ---- YAR010C   |
| Binding | BRE5 ---- RIM1      |
| Binding | BRE5 ---- YRA1      |
| Binding | BRE5 ---- HYP2      |
| Binding | BRE5 ---- STM1      |
| Binding | BRE5 ---- NIP1      |
| Binding | BRE5 ---- NOP2      |
| Binding | LAG2 ---- TOM1      |
| Binding | BRE5 ---- SGV1      |
| Binding | GFA1 ---- YHB1      |
| Binding | BRE5 ---- IDP3      |
| Binding | MIS1 ---- RPL6B     |
| Binding | IDH2 ---- KAP123    |
| Binding | REF2 ---- RPL6B     |
| Binding | HCA4 ---- RPL6B     |
| Binding | NOP4 ---- RPL6B     |
| Binding | CIC1 ---- RPL31B    |
| Binding | NOP15 ---- RPL31B   |
| Binding | ARX1 ---- RPL31B    |
| Binding | NOG2 ---- RPL31B    |
| Binding | RPL31B ---- TIF4631 |
| Binding | RPL6B ---- SDA1     |
| Binding | APL2 ---- RPL6B     |
| Binding | IDH2 ---- RVS167    |
| Binding | MAK21 ---- RPL31B   |
| Binding | LOC1 ---- RPL31B    |
| Binding | RPL31B ---- SEC31   |
| Binding | REI1 ---- RPL20A    |
| Binding | RPL6B ---- SLA1     |
| Binding | MAS1 ---- RPL6B     |
| Binding | MAK21 ---- RPL6B    |
| Binding | FAS1 ---- RAD51     |
| Binding | CFT1 ---- RPL6B     |
| Binding | RNA14 ---- RPL6B    |
| Binding | DBP8 ---- IDH2      |
| Binding | ACT1 ---- SMI1      |
| Binding | GFA1 ---- IDH2      |
| Binding | GFA1 ---- SEC27     |
| Binding | RPL31B ---- TIF6    |
| Binding | GFA1 ---- KAP123    |
| Binding | EFT2 ---- KAP123    |
| Binding | RPL20B ---- RPL31B  |
| Binding | RPL20A ---- RPL31B  |

|         |                   |
|---------|-------------------|
| Binding | GIM5 ---- RPL31B  |
| Binding | MAS1 ---- TMA19   |
| Binding | IDH2 ---- SNF4    |
| Binding | ADR1 ---- GFA1    |
| Binding | CYS4 ---- GFA1    |
| Binding | IDH2 ---- YHB1    |
| Binding | IDH2 ---- SNF1    |
| Binding | ACT1 ---- TRA1    |
| Binding | GCN2 ---- NPT1    |
| Binding | CYS4 ---- TMA19   |
| Binding | HXT7 ---- TIF6    |
| Binding | CYS4 ---- HXT7    |
| Binding | HXT7 ---- HYP2    |
| Binding | FKS1 ---- GFA1    |
| Binding | CSR2 ---- NTH1    |
| Binding | GLK1 ---- NTH1    |
| Binding | CIC1 ---- HXT7    |
| Binding | HXT7 ---- NOP2    |
| Binding | PNC1 ---- YPC1    |
| Binding | ARP2 ---- SSD1    |
| Binding | FAS1 ---- REI1    |
| Binding | KAP123 ---- REI1  |
| Binding | CYS4 ---- REI1    |
| Binding | MIS1 ---- REI1    |
| Binding | ARP2 ---- IDH2    |
| Binding | ARP2 ---- SAC6    |
| Binding | CYR1 ---- MOB1    |
| Binding | IDH2 ---- MOB1    |
| Binding | RVS167 ---- SAC6  |
| Binding | ACT1 ---- CFT1    |
| Binding | ARX1 ---- EFT2    |
| Binding | AVT4 ---- CDC25   |
| Binding | CDC25 ---- NAP1   |
| Binding | CDC25 ---- HYP2   |
| Binding | CDC25 ---- SFB3   |
| Binding | ACT1 ---- ARX1    |
| Binding | RAD51 ---- SLA1   |
| Binding | SEC28 ---- SSD1   |
| Binding | CYR1 ---- MAS1    |
| Binding | CYR1 ---- REG1    |
| Binding | CYR1 ---- SNF2    |
| Binding | CYR1 ---- NOP2    |
| Binding | CYR1 ---- SEC27   |
| Binding | CYR1 ---- CYS4    |
| Binding | CYR1 ---- TMA19   |
| Binding | GFA1 ---- NIP1    |
| Binding | BOI1 ---- BOI2    |
| Binding | ARP3 ---- NIP1    |
| Binding | ACT1 ---- NIP1    |
| Binding | STM1 ---- YSC84   |
| Binding | KAP123 ---- ROM2  |
| Binding | ROM2 ---- TIF4631 |
| Binding | SCP1 ---- YSC84   |
| Binding | ARP3 ---- SCP1    |

|         |                   |
|---------|-------------------|
| Binding | SCP1 ---- SPS1    |
| Binding | HXT7 ---- SCP1    |
| Binding | SCP1 ---- TUP1    |
| Binding | SCS2 ---- TUP1    |
| Binding | RET2 ---- TUP1    |
| Binding | EFT2 ---- TUP1    |
| Binding | EFT2 ---- HOS2    |
| Binding | EFT2 ---- FAS1    |
| Binding | EFT2 ---- YBR238C |
| Binding | EFT2 ---- YHB1    |
| Binding | EFT2 ---- SEC27   |
| Binding | EFT2 ---- RPN10   |
| Binding | EFT2 ---- ROM2    |
| Binding | GLK1 ---- PNC1    |
| Binding | ACT1 ---- EFT2    |
| Binding | EFT2 ---- ZDS1    |
| Binding | HYP2 ---- SAC6    |
| Binding | SAC6 ---- SWE1    |
| Binding | PRP3 ---- SAC6    |
| Binding | DBP8 ---- REI1    |
| Binding | MAS1 ---- SSD1    |
| Binding | CDC25 ---- MAS1   |
| Binding | HXT7 ---- MAS1    |
| Binding | CSR2 ---- SOK1    |
| Binding | PMA1 ---- SNF4    |
| Binding | ADR1 ---- ARP3    |
| Binding | SEC27 ---- URE2   |
| Binding | ABP1 ---- MAS1    |
| Binding | ABP1 ---- RET2    |
| Binding | ABP1 ---- CDC25   |
| Binding | ABP1 ---- GAS1    |
| Binding | ABP1 ---- TMA19   |
| Binding | IDH2 ---- SEC27   |
| Binding | ABP1 ---- LOC1    |
| Binding | ABP1 ---- HYP2    |
| Binding | ABP1 ---- SFB3    |
| Binding | ABP1 ---- CYS4    |
| Binding | BMH2 ---- GFA1    |
| Binding | GFA1 ---- RPC82   |
| Binding | GFA1 ---- PMA1    |
| Binding | FAS1 ---- GFA1    |
| Binding | GFA1 ---- NAP1    |
| Binding | ARP3 ---- GFA1    |
| Binding | BMH1 ---- GFA1    |
| Binding | CYS4 ---- TPK2    |
| Binding | ARP7 ---- GFA1    |
| Binding | CDC6 ---- RPN10   |
| Binding | ADR1 ---- IDH2    |
| Binding | IDH2 ---- URE2    |
| Binding | IDH2 ---- RPC82   |
| Binding | HYP2 ---- IDH2    |
| Binding | IDH2 ---- RPN10   |
| Binding | RVS167 ---- URE2  |
| Binding | GFA1 ---- RVS167  |

|         |                    |
|---------|--------------------|
| Binding | HXT7 ---- RVS167   |
| Binding | ARP3 ---- RVS167   |
| Binding | SSD1 ---- YHB1     |
| Binding | CDC25 ---- GIN4    |
| Binding | ACT1 ---- RVS161   |
| Binding | ACT1 ---- KAP123   |
| Binding | ACT1 ---- GAL83    |
| Binding | SSD1 ---- TIF4631  |
| Binding | CDC25 ---- TMA19   |
| Binding | LOC1 ---- TMA19    |
| Binding | SEC27 ---- TMA19   |
| Binding | HYP2 ---- TMA19    |
| Binding | HXT7 ---- TMA19    |
| Binding | TIF4631 ---- TMA19 |
| Binding | SFB3 ---- TMA19    |
| Binding | SSD1 ---- TMA19    |
| Binding | HYP2 ---- TPK2     |
| Binding | IDH2 ---- YOR135C  |
| Binding | HXT7 ---- PDC6     |
| Binding | CYS4 ---- SSD1     |
| Binding | CDC25 ---- CYS4    |
| Binding | GFA1 ---- YRA1     |
| Binding | EFT2 ---- YRA1     |
| Binding | ARP3 ---- NOP4     |
| Binding | CYR1 ---- NOP4     |
| Binding | CDC25 ---- LOC1    |
| Binding | HXT7 ---- LOC1     |
| Binding | ADR1 ---- URE2     |
| Binding | ADR1 ---- CSR2     |
| Binding | CSR2 ---- HYP2     |
| Binding | BOI2 ---- CSR2     |
| Binding | CSR2 ---- REG1     |
| Binding | CDC25 ---- GAS1    |
| Binding | GAS1 ---- TMA19    |
| Binding | BNR1 ---- CSR2     |
| Binding | GAS1 ---- HXT7     |
| Binding | CDC28 ---- URE2    |
| Binding | RPC82 ---- URE2    |
| Binding | YRA1 ---- ZDS1     |
| Binding | ADA2 ---- EFT2     |
| Binding | CDC25 ---- HXT7    |
| Binding | HXT7 ---- SFB3     |
| Binding | HXT7 ---- SCS2     |
| Binding | HXT7 ---- SLA1     |
| Binding | HXT7 ---- NOP15    |
| Binding | HXT7 ---- NMD3     |
| Binding | NMD3 ---- SSD1     |
| Binding | GAL83 ---- IDH2    |
| Binding | MIS1 ---- ROM2     |
| Binding | EFT2 ---- FKS1     |
| Binding | FKS1 ---- IDH2     |
| Binding | IOC2 ---- RPL31B   |
| Binding | RAS2 ---- RTG3     |
| Binding | FOB1 ---- RAD53    |

|                  |                                           |
|------------------|-------------------------------------------|
| Binding          | SIP4 ---- UME6                            |
| Binding          | HOS2 ---- RIM1                            |
| Binding          | RAD51 ---- SMT3                           |
| Binding          | RAP1 ---- SIR2                            |
| Binding          | SIP2 ---- SIP4                            |
| Binding          | ACT1 ---- YRA1                            |
| Binding          | ACT1 ---- SLA1                            |
| Binding          | RIM1 ---- TUP1                            |
| Binding          | TOM1 ---- ubiquitin                       |
| Binding          | ADA2 ---- HAP4                            |
| Binding          | BRE5 ---- ubiquitin                       |
| Binding          | ACT1 ---- FHL1                            |
| Binding          | RTG3 ---- TUP1                            |
| Binding          | CYC1 ---- CYT2                            |
| Binding          | SOK1 ---- SPS1                            |
| Binding          | RAD51 ---- SCP1                           |
| Binding          | CYC1 ---- HAP4                            |
| Binding          | ABP1 ---- BNR1                            |
| Binding          | transcription activating factor ---- TUP1 |
| Binding          | HAP4 ---- transcription activating factor |
| Binding          | ACT1 ---- BNR1                            |
| Binding          | MAS1 ---- RAD51                           |
| Binding          | ELP4 ---- HAP4                            |
| Binding          | GCN4 ---- HAP4                            |
| Binding          | HAP4 ---- SWI5                            |
| Binding          | transcription activating factor ---- URE2 |
| Binding          | RIM1 ---- URE2                            |
| Binding          | HAP4 ---- SNF2                            |
| Binding          | EFT2 ---- HYP2                            |
| DirectRegulation | CDC25 --+> RAS2                           |
| DirectRegulation | RAS2 --+> CYR1                            |
| DirectRegulation | HOS2 --+> TUP1                            |
| DirectRegulation | SIP4 --> GAL83                            |
| DirectRegulation | HOS2 --> UME6                             |
| DirectRegulation | ABP1 --> SLA1                             |
| DirectRegulation | ARP2 --> ACT1                             |
| DirectRegulation | ABP1 --+> ARP2                            |
| DirectRegulation | SNF1 --+> SIP4                            |
| DirectRegulation | STM1 --  GPA2                             |
| DirectRegulation | SIR4 --+> SIR2                            |
| DirectRegulation | ubiquitin --+> SMT3                       |
| DirectRegulation | GPR1 --+> GPA2                            |
| DirectRegulation | ARP3 --+> ARP2                            |
| DirectRegulation | SNF4 --> SNF1                             |
| DirectRegulation | SHR5 --  RAS2                             |
| DirectRegulation | ABP1 --> RVS167                           |
| DirectRegulation | SLA1 --+> ARP3                            |
| DirectRegulation | SWI5 --+> CDC6                            |
| DirectRegulation | SSN3 --+> SIP4                            |
| DirectRegulation | RAS1 --> RAS2                             |
| DirectRegulation | REG1 --> SNF4                             |
| DirectRegulation | RAS2 --+> GPA2                            |
| DirectRegulation | GLK1 --+> SNF1                            |
| DirectRegulation | SCP1 --  ACT1                             |

|                    |                      |
|--------------------|----------------------|
| DirectRegulation   | CDC28 ---  CDC6      |
| DirectRegulation   | NPT1 --+> PNC1       |
| DirectRegulation   | TUP1 ---> MATALPHA2  |
| DirectRegulation   | CLB2 --+> CDC6       |
| Expression         | glucose ---  SIP4    |
| Expression         | glucose ---  HAP4    |
| Expression         | glucose ---  HXT7    |
| Expression         | CDC6 ---> GAL3       |
| Expression         | ZDS1 ---  SWE1       |
| Expression         | superoxide ---  UTH1 |
| Expression         | glucose ---  GPR1    |
| Expression         | TPK2 ---> NTH1       |
| Expression         | SIR2 --+> PNC1       |
| GeneticInteraction | ACT1 ---- RNA14      |
| GeneticInteraction | ACT1 ---- SWP1       |
| GeneticInteraction | HOS2 ---- SET2       |
| GeneticInteraction | CLA4 ---- URE2       |
| GeneticInteraction | BRE5 ---- SET2       |
| GeneticInteraction | ARP2 ---- SAC6       |
| GeneticInteraction | ARP2 ---- UTH1       |
| GeneticInteraction | BIM1 ---- BRE5       |
| GeneticInteraction | RIC1 ---- SNF4       |
| GeneticInteraction | BRE5 ---- RIC1       |
| GeneticInteraction | SNF4 ---- YPT6       |
| GeneticInteraction | BRE5 ---- YPT6       |
| GeneticInteraction | CTF4 ---- RAD51      |
| GeneticInteraction | BRE5 ---- CTF4       |
| GeneticInteraction | YBR255W ---- YKE2    |
| GeneticInteraction | SSD1 ---- YKE2       |
| GeneticInteraction | HOS2 ---- YKE2       |
| GeneticInteraction | GLK1 ---- YKE2       |
| GeneticInteraction | PAC10 ---- YBR255W   |
| GeneticInteraction | PAC10 ---- SSD1      |
| GeneticInteraction | HOS2 ---- PAC10      |
| GeneticInteraction | GLK1 ---- PAC10      |
| GeneticInteraction | GIM5 ---- YBR255W    |
| GeneticInteraction | GIM5 ---- SSD1       |
| GeneticInteraction | GIM5 ---- HOS2       |
| GeneticInteraction | GIM5 ---- GLK1       |
| GeneticInteraction | BRE5 ---- CSM3       |
| GeneticInteraction | POL32 ---- RAD51     |
| GeneticInteraction | BRE5 ---- TOP1       |
| GeneticInteraction | RAS1 ---- RAS2       |
| GeneticInteraction | CHS3 ---- SAC6       |
| GeneticInteraction | BRE5 ---- CHS3       |
| GeneticInteraction | CHS7 ---- SAC6       |
| GeneticInteraction | FKS1 ---- ROM2       |
| GeneticInteraction | BRE5 ---- FKS1       |
| GeneticInteraction | CSR2 ---- FKS1       |
| GeneticInteraction | GAS1 ---- SSD1       |
| GeneticInteraction | GAS1 ---- ROM2       |
| GeneticInteraction | HOC1 ---- SAC6       |
| GeneticInteraction | BRE5 ---- HOC1       |
| GeneticInteraction | SAC6 ---- SKT5       |



|                    |                     |
|--------------------|---------------------|
| GeneticInteraction | BRE5 ---- SKT5      |
| GeneticInteraction | ROM2 ---- SMI1      |
| GeneticInteraction | BRE5 ---- SMI1      |
| GeneticInteraction | RVS161 ---- YBR255W |
| GeneticInteraction | RVS167 ---- YBR255W |
| GeneticInteraction | ARR4 ---- BRE5      |
| GeneticInteraction | ARR4 ---- YBR255W   |
| GeneticInteraction | BRE5 ---- SEC28     |
| GeneticInteraction | BRE5 ---- RMD7      |
| GeneticInteraction | BRE5 ---- SPF1      |
| GeneticInteraction | BRE5 ---- MDM39     |
| GeneticInteraction | BRE5 ---- RGP1      |
| GeneticInteraction | BRE5 ---- SCS7      |
| GeneticInteraction | BRE5 ---- RET2      |
| GeneticInteraction | BRE5 ---- SEC27     |
| GeneticInteraction | BRE5 ---- STE24     |
| GeneticInteraction | BRE5 ---- ERV14     |
| GeneticInteraction | BRE5 ---- PSD2      |
| GeneticInteraction | DRS2 ---- YBR255W   |
| GeneticInteraction | GAS1 ---- LAG1      |
| GeneticInteraction | LAG1 ---- PMA1      |
| GeneticInteraction | LAG1 ---- MDM39     |
| GeneticInteraction | LAG1 ---- ORM2      |
| GeneticInteraction | LAG1 ---- SEC28     |
| GeneticInteraction | LAG1 ---- SCS7      |
| GeneticInteraction | LAG1 ---- RGP1      |
| GeneticInteraction | LAG1 ---- RIC1      |
| GeneticInteraction | RTN1 ---- YBR255W   |
| GeneticInteraction | SCS2 ---- YBR255W   |
| GeneticInteraction | SHR5 ---- YBR255W   |
| GeneticInteraction | SSO1 ---- YBR255W   |
| GeneticInteraction | SUR2 ---- YBR255W   |
| GeneticInteraction | SUR4 ---- YBR255W   |
| GeneticInteraction | TPO1 ---- YBR255W   |
| GeneticInteraction | CAT8 ---- SNF4      |
| GeneticInteraction | CDC25 ---- RAS1     |
| GeneticInteraction | CDC6 ---- CLB2      |
| GeneticInteraction | CDC6 ---- SWI5      |
| GeneticInteraction | CYR1 ---- RAS2      |
| GeneticInteraction | GPA2 ---- RAS2      |
| GeneticInteraction | HAP4 ---- MBR1      |
| GeneticInteraction | ATP1 ---- RAS2      |
| GeneticInteraction | CDC25 ---- RAS2     |
| GeneticInteraction | MBR1 ---- SCH9      |
| GeneticInteraction | CDC25 ---- SCH9     |
| GeneticInteraction | CYR1 ---- SCH9      |
| GeneticInteraction | SAC6 ---- SCP1      |
| GeneticInteraction | SCS2 ---- SIR2      |
| GeneticInteraction | CAT8 ---- SIP4      |
| GeneticInteraction | HOS2 ---- SKT5      |
| GeneticInteraction | SMT3 ---- TOM1      |
| GeneticInteraction | SNF1 ---- SNF4      |
| GeneticInteraction | SSD1 ---- YPT6      |
| GeneticInteraction | GPR1 ---- TPK2      |

|                    |                  |
|--------------------|------------------|
| GeneticInteraction | RAS2 ---- TPK2   |
| GeneticInteraction | MPT5 ---- STM1   |
| GeneticInteraction | STM1 ---- TOM1   |
| GeneticInteraction | FKS1 ---- ZDS1   |
| GeneticInteraction | CDC28 ---- ZDS1  |
| GeneticInteraction | BOI1 ---- BOI2   |
| GeneticInteraction | CHS3 ---- GFA1   |
| GeneticInteraction | PUT3 ---- URE2   |
| GeneticInteraction | ASF1 ---- RAD51  |
| GeneticInteraction | MPT5 ---- SSD1   |
| GeneticInteraction | GPA2 ---- SCH9   |
| GeneticInteraction | ELG1 ---- RAD51  |
| GeneticInteraction | ACT1 ---- RVS167 |
| GeneticInteraction | ABP1 ---- SLA1   |
| GeneticInteraction | CYR1 ---- TOM1   |
| GeneticInteraction | CYR1 ---- GPA2   |
| GeneticInteraction | GPA2 ---- GPR1   |
| GeneticInteraction | RAS1 ---- REG1   |
| GeneticInteraction | RAS2 ---- REG1   |
| GeneticInteraction | HOS2 ---- RAD6   |
| GeneticInteraction | HOS2 ---- SWI1   |
| GeneticInteraction | BMH1 ---- RTG3   |
| GeneticInteraction | BMH2 ---- RTG3   |
| GeneticInteraction | SCH9 ---- TOM1   |
| GeneticInteraction | HOS2 ---- RAP1   |
| GeneticInteraction | RAS2 ---- SHR5   |
| GeneticInteraction | HOS2 ---- SIR2   |
| GeneticInteraction | ACT1 ---- SUR2   |
| GeneticInteraction | ACT1 ---- SUR4   |
| GeneticInteraction | SWI1 ---- TUP1   |
| GeneticInteraction | GPA2 ---- TPK2   |
| GeneticInteraction | SNF1 ---- TUP1   |
| GeneticInteraction | CLB2 ---- RAS2   |
| GeneticInteraction | CSR2 ---- GAL3   |
| GeneticInteraction | CDC6 ---- SIR2   |
| GeneticInteraction | CDC6 ---- SIR4   |
| GeneticInteraction | SOK1 ---- TPK2   |
| GeneticInteraction | WHI2 ---- ZDS1   |
| GeneticInteraction | SWE1 ---- ZDS1   |
| GeneticInteraction | NAP1 ---- REI1   |
| GeneticInteraction | CLA4 ---- REI1   |
| GeneticInteraction | GIN4 ---- REI1   |
| GeneticInteraction | GCN4 ---- URE2   |
| GeneticInteraction | ACT1 ---- RVS161 |
| GeneticInteraction | SSD1 ---- TOR1   |
| GeneticInteraction | REG1 ---- SNF4   |
| GeneticInteraction | BMH1 ---- CDC6   |
| GeneticInteraction | NPT1 ---- SIR2   |
| GeneticInteraction | GPA2 ---- RAS1   |
| GeneticInteraction | RAS1 ---- TPK2   |
| GeneticInteraction | BRE5 ---- SFB3   |
| GeneticInteraction | BMH1 ---- CDC25  |
| GeneticInteraction | BMH2 ---- CDC25  |
| GeneticInteraction | LAG1 ---- YPC1   |

|                    |                  |
|--------------------|------------------|
| GeneticInteraction | BNA2 ---- NPT1   |
| GeneticInteraction | CDC6 ---- ORC2   |
| GeneticInteraction | RAS2 ---- SSN3   |
| GeneticInteraction | FOB1 ---- GLK1   |
| GeneticInteraction | FOB1 ---- GPA2   |
| GeneticInteraction | FOB1 ---- SIR2   |
| GeneticInteraction | GLK1 ---- SIR2   |
| GeneticInteraction | GPA2 ---- SIR2   |
| GeneticInteraction | CDC6 ---- RAD53  |
| GeneticInteraction | FHL1 ---- SCH9   |
| GeneticInteraction | RAS2 ---- ROM2   |
| GeneticInteraction | ROM2 ---- TPK2   |
| GeneticInteraction | ABP1 ---- RVS161 |
| GeneticInteraction | IDH2 ---- IDP3   |
| GeneticInteraction | CYR1 ---- REG1   |
| GeneticInteraction | SAC6 ---- SWE1   |
| GeneticInteraction | CSG2 ---- HOS2   |
| GeneticInteraction | ASF1 ---- SIR2   |
| GeneticInteraction | SPF1 ---- TUP1   |
| GeneticInteraction | HYP2 ---- ZDS1   |
| GeneticInteraction | HYP2 ---- ROM2   |
| GeneticInteraction | HYP2 ---- SSD1   |
| GeneticInteraction | RAD18 ---- RAD51 |
| GeneticInteraction | ABP1 ---- ARP2   |
| GeneticInteraction | ARP2 ---- ARP3   |
| GeneticInteraction | ARP6 ---- BRE5   |
| GeneticInteraction | BRE5 ---- HTZ1   |
| GeneticInteraction | BRE5 ---- SWR1   |
| GeneticInteraction | BRE5 ---- YAF9   |
| GeneticInteraction | BRE5 ---- SWC5   |
| GeneticInteraction | BRE5 ---- VPS72  |
| GeneticInteraction | BRE5 ---- VPS71  |
| GeneticInteraction | BRE5 ---- ELG1   |
| GeneticInteraction | ARP6 ---- HOS2   |
| GeneticInteraction | HOS2 ---- HTZ1   |
| GeneticInteraction | HOS2 ---- SWR1   |
| GeneticInteraction | HOS2 ---- YAF9   |
| GeneticInteraction | HOS2 ---- SWC5   |
| GeneticInteraction | HOS2 ---- VPS72  |
| GeneticInteraction | HOS2 ---- VPS71  |
| GeneticInteraction | BRE5 ---- ORC2   |
| GeneticInteraction | CDC6 ---- CTF4   |
| GeneticInteraction | ELP4 ---- HOS2   |
| GeneticInteraction | BIM1 ---- RAD51  |
| GeneticInteraction | BIM1 ---- HOS2   |
| GeneticInteraction | HSP82 ---- RTG3  |
| GeneticInteraction | HSP82 ---- SNF4  |
| GeneticInteraction | HSP82 ---- UTH1  |
| GeneticInteraction | HSP82 ---- ROM2  |
| GeneticInteraction | HSP82 ---- RAS2  |
| GeneticInteraction | BRE5 ---- HSP82  |
| GeneticInteraction | CSR2 ---- HSP82  |
| GeneticInteraction | CDC6 ---- CSM3   |
| GeneticInteraction | CDC6 ---- RPL20B |

|                    |                      |
|--------------------|----------------------|
| GeneticInteraction | CDC6 ---- CLA4       |
| GeneticInteraction | ASF1 ---- BRE5       |
| GeneticInteraction | ASF1 ---- NPT1       |
| GeneticInteraction | ASF1 ---- HOS2       |
| GeneticInteraction | CSM3 ---- NPT1       |
| GeneticInteraction | CSM3 ---- RAD51      |
| GeneticInteraction | CTF4 ---- NPT1       |
| GeneticInteraction | BRE5 ---- CCS1       |
| GeneticInteraction | CCS1 ---- NPT1       |
| GeneticInteraction | CCS1 ---- RAD51      |
| GeneticInteraction | MDM39 ---- RAD51     |
| GeneticInteraction | HOS2 ---- MDM39      |
| GeneticInteraction | MDM39 ---- SAC6      |
| GeneticInteraction | CLA4 ---- NPT1       |
| GeneticInteraction | CLB2 ---- NPT1       |
| GeneticInteraction | ELG1 ---- NPT1       |
| GeneticInteraction | MRPL37 ---- NPT1     |
| GeneticInteraction | NPT1 ---- POL32      |
| GeneticInteraction | NPT1 ---- RAD18      |
| GeneticInteraction | NPT1 ---- RAD51      |
| GeneticInteraction | NPT1 ---- REF2       |
| GeneticInteraction | NPT1 ---- RGP1       |
| GeneticInteraction | NPT1 ---- RIC1       |
| GeneticInteraction | HOS2 ---- NPT1       |
| GeneticInteraction | NPT1 ---- SET2       |
| GeneticInteraction | NPT1 ---- SMI1       |
| GeneticInteraction | BRE5 ---- POL32      |
| GeneticInteraction | BRE5 ---- RAD18      |
| GeneticInteraction | CLA4 ---- RAD51      |
| GeneticInteraction | RAD51 ---- RAD6      |
| GeneticInteraction | RAD51 ---- RMD7      |
| GeneticInteraction | RAD51 ---- RPN10     |
| GeneticInteraction | BRE5 ---- RAD53      |
| GeneticInteraction | BRE5 ---- RAD6       |
| GeneticInteraction | NPT1 ---- RAD6       |
| GeneticInteraction | RAD6 ---- RAS2       |
| GeneticInteraction | RAD6 ---- SAC6       |
| GeneticInteraction | NPT1 ---- RMD7       |
| GeneticInteraction | HOS2 ---- RMD7       |
| GeneticInteraction | RMD7 ---- SAC6       |
| GeneticInteraction | BRE5 ---- RPN10      |
| GeneticInteraction | HOS2 ---- RPN10      |
| GeneticInteraction | RPN10 ---- UTH1      |
| GeneticInteraction | BRE5 ---- SWC3       |
| GeneticInteraction | HOS2 ---- SWC3       |
| GeneticInteraction | BOI1 ---- BOI2       |
| GeneticInteraction | CSG2 ---- HOS2       |
| GeneticInteraction | ELG1 ---- RAD51      |
| GeneticInteraction | POL32 ---- RAD51     |
| GeneticInteraction | BRE5 ---- RIC1       |
| GeneticInteraction | CTF4 ---- RAD51      |
| MolSynthesis       | ACT1 ---> superoxide |
| MolSynthesis       | GLK1 ---  glucose    |
| MolSynthesis       | CDC28 ---  CDC6      |

|                  |                           |
|------------------|---------------------------|
| MolSynthesis     | TUP1 ---  glucose         |
| MolSynthesis     | CSR2 ---> nitrogen        |
| MolSynthesis     | URE2 ---> nitrogen        |
| MolTransport     | UME6 ---> HOS2            |
| MolTransport     | MPT5 ---> SIR4            |
| MolTransport     | CDC28 ---> CDC6           |
| MolTransport     | SNF4 ---> SNF1            |
| MolTransport     | CLB2 ---> ACT1            |
| MolTransport     | RIM1 ---> TUP1            |
| MolTransport     | MATALPHA2 ---> TUP1       |
| PromoterBinding  | ATP1 ---- HAP4            |
| PromoterBinding  | SIP4 ---- YBR266C         |
| PromoterBinding  | MRPL37 ---- SIP4          |
| PromoterBinding  | HAP4 ---- MATALPHA2       |
| PromoterBinding  | HAP4 ---- MATALPHA1       |
| PromoterBinding  | GPR1 ---- SWI5            |
| PromoterBinding  | FHL1 ---- RPL31B          |
| PromoterBinding  | RAP1 ---- RPL31B          |
| PromoterBinding  | EFT2 ---- FHL1            |
| PromoterBinding  | HAP4 ---- PRP3            |
| PromoterBinding  | GCN4 ---- SMT3            |
| PromoterBinding  | ERG26 ---- HAP4           |
| PromoterBinding  | ERG26 ---- RTG3           |
| PromoterBinding  | RAP1 ---- SIP4            |
| PromoterBinding  | BNA2 ---- HAP4            |
| PromoterBinding  | HAP4 ---- PUT3            |
| PromoterBinding  | HAP4 ---- PHD1            |
| PromoterBinding  | ACE2 ---- UTH1            |
| PromoterBinding  | FHL1 ---- RPL6B           |
| PromoterBinding  | RAP1 ---- RPL6B           |
| PromoterBinding  | CSR2 ---- RAP1            |
| PromoterBinding  | HAP4 ---- RPC82           |
| ProtModification | REG1 ---> GLK1            |
| ProtModification | SIR2 ---> SIR4            |
| Regulation       | glucose --+> GLK1         |
| Regulation       | BMH2 ---> grow            |
| Regulation       | CLA4 ---> budding         |
| Regulation       | TUP1 ---> proliferation   |
| Regulation       | ACT1 ---> endocytosis     |
| Regulation       | BNR1 ---> cytoskeleton    |
| Regulation       | GPA2 ---> cell survival   |
| Regulation       | SIR2 --+> cell survival   |
| Regulation       | FOB1 ---> senescence      |
| Regulation       | MOB1 ---> cytoskeleton    |
| Regulation       | RAS2 ---> cell survival   |
| Regulation       | URE2 ---> proliferation   |
| Regulation       | GPR1 ---> invasive growth |
| Regulation       | SEC31 ---> budding        |
| Regulation       | REG1 ---> grow            |
| Regulation       | CDC28 ---> budding        |
| Regulation       | GLK1 ---  apoptosis       |
| Regulation       | SPS1 ---> apoptosis       |
| Regulation       | REG1 ---> GFA1            |
| Regulation       | BNR1 ---> budding         |

|            |                                       |
|------------|---------------------------------------|
| Regulation | GCN4 ---> budding                     |
| Regulation | CDC6 ---> senescence                  |
| Regulation | RAD51 ---> apoptosis                  |
| Regulation | RVS161 ---> cytoskeleton              |
| Regulation | GCN4 ---> grow                        |
| Regulation | CLB2 ---> grow                        |
| Regulation | RAD51 ---> proliferation              |
| Regulation | LAG1 ---> senescence                  |
| Regulation | URE2 ---> autophagy                   |
| Regulation | SMT3 ---> apoptosis                   |
| Regulation | NUP116 ---> grow                      |
| Regulation | ACT1 ---> cell survival               |
| Regulation | EFT2 ---> synthesis                   |
| Regulation | GPA2 ---> invasive growth             |
| Regulation | RIM1 ---> grow                        |
| Regulation | SIR2 ---> synthesis                   |
| Regulation | SPF1 ---> grow                        |
| Regulation | RIM1 ---  CDC6                        |
| Regulation | SNF1 ---> grow                        |
| Regulation | CDC6 ---> grow                        |
| Regulation | CLB2 ---> budding                     |
| Regulation | CYR1 ---> grow                        |
| Regulation | ARP3 ---> endocytosis                 |
| Regulation | RAS1 ---> proliferation               |
| Regulation | ACT1 ---> synthesis                   |
| Regulation | RAS2 ---> budding                     |
| Regulation | ARP3 ---> cell survival               |
| Regulation | ACT1 ---> apoptosis                   |
| Regulation | SIR2 ---  chromosomal DNA replication |
| Regulation | RAS2 ---> proliferation               |
| Regulation | SPT5 ---> grow                        |
| Regulation | NAP1 ---> grow                        |
| Regulation | RAS2 ---> grow                        |
| Regulation | HSP82 ---> cytoskeleton               |
| Regulation | ZDS1 ---> grow                        |
| Regulation | RAS1 ---> grow                        |
| Regulation | GPA2 ---  MCD4                        |
| Regulation | TUP1 ---> fermentation                |
| Regulation | SIP4 --+> MCD4                        |
| Regulation | RVS167 ---> cytoskeleton              |
| Regulation | TOR1 ---> budding                     |
| Regulation | MPT5 ---  senescence                  |
| Regulation | SMT3 ---> budding                     |
| Regulation | NMD3 ---> grow                        |
| Regulation | BNR1 ---> grow                        |
| Regulation | YPT6 ---> budding                     |
| Regulation | HOS2 ---> senescence                  |
| Regulation | FKS1 ---> budding                     |
| Regulation | RAD51 ---> growth rate                |
| Regulation | CDC6 --+> chromosomal DNA replication |
| Regulation | MCD4 ---> grow                        |
| Regulation | GIN4 ---> grow                        |
| Regulation | SIR2 --+> senescence                  |
| Regulation | SIR2 ---> budding                     |

|            |                                           |
|------------|-------------------------------------------|
| Regulation | GAS1 ---> grow                            |
| Regulation | FOB1 ---> growth rate                     |
| Regulation | synthase ---> grow                        |
| Regulation | BOI2 ---> grow                            |
| Regulation | SCH9 ---> cell survival                   |
| Regulation | YHB1 ---> grow                            |
| Regulation | SWE1 ---> budding                         |
| Regulation | CDC28 ---> ACT1                           |
| Regulation | RAS2 ---> senescence                      |
| Regulation | HSP82 ---> grow                           |
| Regulation | HSP82 ---> budding                        |
| Regulation | TOP1 ---> grow                            |
| Regulation | MCD4 ---> budding                         |
| Regulation | ubiquitin ---> budding                    |
| Regulation | SIR4 ---> senescence                      |
| Regulation | RAP1 ---> grow                            |
| Regulation | DRS2 ---> budding                         |
| Regulation | HOS2 ---> synthesis                       |
| Regulation | MATALPHA1 ---> grow                       |
| Regulation | ATP1 ---> grow                            |
| Regulation | CLA4 ---> ACT1                            |
| Regulation | SIR2 ---> grow                            |
| Regulation | TRA1 ---> grow                            |
| Regulation | CDC6 ---> proliferation                   |
| Regulation | CHS3 ---> grow                            |
| Regulation | transcription activating factor ---> grow |
| Regulation | SAC6 ---> endocytosis                     |
| Regulation | RAD51 ---> cell survival                  |
| Regulation | CDC6 ---> budding                         |
| Regulation | ubiquitin ---> grow                       |
| Regulation | BOI1 ---> grow                            |
| Regulation | CDC28 ---> grow                           |
| Regulation | HYP2 ---> grow                            |
| Regulation | TOR1 ---> grow                            |
| Regulation | FOB1 ---> grow                            |
| Regulation | SSO1 ---> grow                            |
| Regulation | GPA2 --+> SCH9                            |
| Regulation | RAD51 ---> chromosomal DNA replication    |
| Regulation | GCN2 ---> grow                            |
| Regulation | URE2 ---> growth rate                     |
| Regulation | PSD2 ---> grow                            |
| Regulation | STM1 ---  TOM1                            |
| Regulation | heme --+> HAP4                            |
| Regulation | BMH1 ---> budding                         |
| Regulation | SNF4 ---> senescence                      |
| Regulation | TPO1 ---> grow                            |
| Regulation | SUR4 ---> grow                            |
| Regulation | ACT1 ---> invasive growth                 |
| Regulation | PMA1 ---> grow                            |
| Regulation | CDC6 --+> RIM1                            |
| Regulation | SMT3 ---> grow                            |
| Regulation | NPT1 --+> senescence                      |
| Regulation | GLK1 ---> respiration                     |
| Regulation | NPT1 ---> SIR2                            |

|            |                                              |
|------------|----------------------------------------------|
| Regulation | CDC28 --+> cytoskeleton                      |
| Regulation | LAG1 ---> synthase                           |
| Regulation | SPC1 ---> grow                               |
| Regulation | SMT3 ---> cell survival                      |
| Regulation | SIR2 ---> respiration                        |
| Regulation | TMA19 ---  apoptosis                         |
| Regulation | FHL1 ---> grow                               |
| Regulation | HOS2 ---> cell survival                      |
| Regulation | BMH2 ---> budding                            |
| Regulation | CDC6 --+> RAP1                               |
| Regulation | YPT6 ---> grow                               |
| Regulation | NPT1 --+> cell survival                      |
| Regulation | STM1 ---> grow                               |
| Regulation | SIR2 ---  apoptosis                          |
| Regulation | FKS1 ---> grow                               |
| Regulation | TMA19 ---> cell survival                     |
| Regulation | HXT7 --+> growth rate                        |
| Regulation | GAL3 ---> grow                               |
| Regulation | PNC1 ---> senescence                         |
| Regulation | HAP4 ---> YHB1                               |
| Regulation | NSE3 ---> grow                               |
| Regulation | SUR2 ---> grow                               |
| Regulation | HOS2 ---> proliferation                      |
| Regulation | HAP4 ---> respiration                        |
| Regulation | SGV1 ---> grow                               |
| Regulation | RAD6 ---> budding                            |
| Regulation | ABP1 ---> endocytosis                        |
| Regulation | RAS1 ---> senescence                         |
| Regulation | SIR4 ---> budding                            |
| Regulation | STE24 ---> grow                              |
| Regulation | UTH1 ---> autophagy                          |
| Regulation | CDC25 --+> synthase                          |
| Regulation | SEC28 ---> budding                           |
| Regulation | MATALPHA2 ---> budding                       |
| Regulation | UTH1 ---> chromosomal DNA replication        |
| Regulation | RIC1 ---> grow                               |
| Regulation | SLA1 ---> cytoskeleton                       |
| Regulation | SPC1 ---> budding                            |
| Regulation | CLA4 ---> cytoskeleton                       |
| Regulation | HAP4 ---> growth rate                        |
| Regulation | CYC1 ---> grow                               |
| Regulation | AGP1 ---> grow                               |
| Regulation | GIN4 ---> budding                            |
| Regulation | SSN3 ---> grow                               |
| Regulation | HOS2 ---> growth rate                        |
| Regulation | TMA19 ---> proliferation                     |
| Regulation | WHI2 ---> budding                            |
| Regulation | GLK1 ---> proliferation                      |
| Regulation | transcription activating factor ---> budding |
| Regulation | BIM1 ---> budding                            |
| Regulation | CYR1 ---> budding                            |
| Regulation | TOR1 ---  autophagy                          |
| Regulation | RAS2 ---> growth rate                        |
| Regulation | RVS167 ---> budding                          |



|            |                                       |
|------------|---------------------------------------|
| Regulation | ARP2 ---> budding                     |
| Regulation | CTF4 ---> budding                     |
| Regulation | ACT1 --+> ARP2                        |
| Regulation | ABP1 ---> chromosomal DNA replication |
| Regulation | BIM1 ---> grow                        |
| Regulation | RAS2 --+> apoptosis                   |
| Regulation | RVS167 ---> grow                      |
| Regulation | MOB1 ---> budding                     |
| Regulation | HXT7 ---> fermentation                |
| Regulation | CYC1 ---> budding                     |
| Regulation | SEC27 ---> budding                    |
| Regulation | GLK1 ---> senescence                  |
| Regulation | UME6 ---> grow                        |
| Regulation | ZDS1 ---> senescence                  |
| Regulation | synthase ---> budding                 |
| Regulation | URE2 ---> fermentation                |
| Regulation | RAS2 ---> cytoskeleton                |
| Regulation | SNF5 ---> grow                        |
| Regulation | SSD1 ---> grow                        |
| Regulation | SCH9 ---> growth rate                 |
| Regulation | SCH9 ---> senescence                  |
| Regulation | YSC84 ---> endocytosis                |
| Regulation | CLA4 ---> grow                        |
| Regulation | TOR1 ---> synthesis                   |
| Regulation | TIF6 ---> grow                        |
| Regulation | ERV14 ---> budding                    |
| Regulation | ARP2 ---> grow                        |
| Regulation | HAP4 ---> fermentation                |
| Regulation | ARP3 ---> synthesis                   |
| Regulation | ACE2 ---> grow                        |
| Regulation | GPA2 ---> senescence                  |
| Regulation | TMA19 ---> grow                       |
| Regulation | SMT3 ---> chromosomal DNA replication |
| Regulation | CDC6 ---> apoptosis                   |
| Regulation | HOS2 ---  SWI5                        |
| Regulation | SSD1 ---> senescence                  |
| Regulation | SWE1 ---> grow                        |
| Regulation | ACT1 ---> chromosomal DNA replication |
| Regulation | ORC2 ---> budding                     |
| Regulation | SPS1 ---> MCD4                        |
| Regulation | YRA1 ---> grow                        |
| Regulation | SCP1 ---> budding                     |
| Regulation | SPS1 ---> growth rate                 |
| Regulation | GPR1 ---> senescence                  |
| Regulation | ROM2 ---> grow                        |
| Regulation | SMI1 ---  budding                     |
| Regulation | ACT1 --+> proliferation               |
| Regulation | glucose --+> TPK2                     |
| Regulation | LAG1 --+> endocytosis                 |
| Regulation | CDC6 ---> synthesis                   |
| Regulation | RAS1 --+> invasive growth             |
| Regulation | ACE2 --+> CDC6                        |
| Regulation | SIP4 ---> invasive growth             |
| Regulation | RAS2 --+> invasive growth             |

|            |                            |
|------------|----------------------------|
| Regulation | HOS2 ---  MCD4             |
| Regulation | RAS1 ---> cytoskeleton     |
| Regulation | glucose --+> RAS2          |
| Regulation | TPK2 ---> growth rate      |
| Regulation | TPK2 ---> RIM1             |
| Regulation | glucose ---> SNF4          |
| Regulation | SET2 ---> budding          |
| Regulation | APL2 ---> grow             |
| Regulation | TPK2 ---> invasive growth  |
| Regulation | CDC6 ---> CDC28            |
| Regulation | LOC1 ---> budding          |
| Regulation | RAD51 ---> senescence      |
| Regulation | ABP1 ---> growth rate      |
| Regulation | nitrogen --+> GPA2         |
| Regulation | FOB1 ---> proliferation    |
| Regulation | HAP4 ---> synthesis        |
| Regulation | URE2 ---> invasive growth  |
| Regulation | PNC1 --+> SIR2             |
| Regulation | ROM2 ---> proliferation    |
| Regulation | GCN2 ---> budding          |
| Regulation | FOB1 ---> synthesis        |
| Regulation | URE2 ---> grow             |
| Regulation | GLK1 --+> REG1             |
| Regulation | GPA2 ---> grow             |
| Regulation | HOS2 ---> grow             |
| Regulation | SCP1 ---> cytoskeleton     |
| Regulation | HAP4 ---> senescence       |
| Regulation | SNF1 ---> budding          |
| Regulation | SSD1 ---> proliferation    |
| Regulation | BOI1 ---> budding          |
| Regulation | LAG1 ---> apoptosis        |
| Regulation | ACE2 ---> budding          |
| Regulation | ORC2 ---> grow             |
| Regulation | ACT1 ---> respiration      |
| Regulation | SIR2 ---> proliferation    |
| Regulation | CDC25 ---> invasive growth |
| Regulation | SDA1 ---> budding          |
| Regulation | GCN4 --+> URE2             |
| Regulation | YKE2 ---> budding          |
| Regulation | ROM2 ---> endocytosis      |
| Regulation | RAP1 ---> budding          |
| Regulation | BOI1 ---> proliferation    |
| Regulation | RAD6 ---> grow             |
| Regulation | REI1 ---  SWE1             |
| Regulation | LAG1 ---> proliferation    |
| Regulation | GCN4 --+> IDH2             |
| Regulation | TOR1 ---> proliferation    |
| Regulation | SDA1 ---> grow             |
| Regulation | RAS2 ---> GCN4             |
| Regulation | GPI8 ---> grow             |
| Regulation | SIR2 ---> fermentation     |
| Regulation | TPK2 ---> budding          |
| Regulation | RAS2 ---  MCD4             |
| Regulation | SCP1 ---> grow             |

|            |                                           |
|------------|-------------------------------------------|
| Regulation | FOB1 ---  chromosomal DNA replication     |
| Regulation | heme ---> ACT1                            |
| Regulation | SNF1 --+> SNF4                            |
| Regulation | SIP4 ---> fermentation                    |
| Regulation | RAS1 ---> MCD4                            |
| Regulation | TPK2 ---> fermentation                    |
| Regulation | TPK2 --+> transcription activating factor |
| Regulation | BMH1 ---> grow                            |
| Regulation | TUP1 ---> cell survival                   |
| Regulation | SSD1 ---> cell survival                   |
| Regulation | HOS2 ---> SIR2                            |
| Regulation | HAP4 ---> cell survival                   |
| Regulation | ABP1 ---> ARP2                            |
| Regulation | TOR1 ---> senescence                      |
| Regulation | EFT2 ---> apoptosis                       |
| Regulation | ARP2 ---> ACT1                            |
| Regulation | ACT1 ---> senescence                      |
| Regulation | TPK2 ---> apoptosis                       |
| Regulation | EFT2 ---> cell survival                   |
| Regulation | EFT2 ---> autophagy                       |
| Regulation | GCN4 --+> TUP1                            |
| Regulation | ACT1 ---> autophagy                       |
| Regulation | SCH9 ---> ADR1                            |
