# Supplementary material for: Shortest-Path Network Analysis Is a Useful Approach toward Identifying Genetic Determinants of Longevity
Source: PubMed Central journal article supplement (PMC2583956; doi:10.1371/journal.pone.0003802), 2008-11-25
Supplement: pone.0003802.s005.pdf [file pone.0003802.s005.pdf]

**Table S3. Components of the Binding shortest-path longevity network.** The Binding shortest-path longevity network (SPLN) contains 171 genes/proteins. The Binding SPLN contains 33 of the genes/proteins previously reported to increase replicative life span that were used to build the Binding SPLN (Input), 45 genes that are required for vegetative growth in yeast (Essential), 5 non-essential genes that are not present in the *MAT $\alpha$*  haploid deletion collection or for which no viable cells were obtained (No Grow/No Deletion), and 88 genes for which replicative life span was assayed (RLS Determined). Seven of the genes/proteins previously reported to increase replicative life span are present in the Composite SPLN (**Figure S1**), but are not contained in the Binding SPLN: Gpr1, Hxk2, Rpd3, Rpl31a, Sch9, Uth1, and Ybr266c.

| ORF     | Gene  | Status         |
|---------|-------|----------------|
| YCR088W | ABP1  | RLS Determined |
| YFL039C | ACT1  | Essential      |
| YDR448W | ADA2  | RLS Determined |
| YDR216W | ADR1  | RLS Determined |
| YCL025C | AGP1  | RLS Determined |
| YKL135C | APL2  | RLS Determined |
| YDL029W | ARP2  | Essential      |
| YJR065C | ARP3  | Essential      |
| YPR034W | ARP7  | Essential      |
| YDR101C | ARX1  | RLS Determined |
| YNL101W | AVT4  | RLS Determined |
| YER177W | BMH1  | RLS Determined |
| YDR099W | BMH2  | RLS Determined |
| YIL159W | BNR1  | RLS Determined |
| YBL085W | BOI1  | RLS Determined |
| YER114C | BOI2  | RLS Determined |
| YNR051C | BRE5  | Input          |
| YLR310C | CDC25 | Input          |
| YBR160W | CDC28 | Essential      |
| YJL194W | CDC6  | Input          |
| YDR301W | CFT1  | Essential      |
| YHR142W | CHS7  | RLS Determined |
| YHR052W | CIC1  | Essential      |
| YNL298W | CLA4  | RLS Determined |
| YPR119W | CLB2  | RLS Determined |
| YBR036C | CSG2  | RLS Determined |
| YJR048W | CYC1  | RLS Determined |
| YJL005W | CYR1  | Input          |
| YGR155W | CYS4  | RLS Determined |
| YKL087C | CYT2  | RLS Determined |
| YHR169W | DBP8  | Essential      |

---

|         |        |                     |
|---------|--------|---------------------|
| YDR385W | EFT2   | RLS Determined      |
| YOR144C | ELG1   | RLS Determined      |
| YPL101W | ELP4   | RLS Determined      |
| YKL182W | FAS1   | Essential           |
| YPR104C | FHL1   | Essential           |
| YLR342W | FKS1   | RLS Determined      |
| YDR110W | FOB1   | Input               |
| YER027C | GAL83  | RLS Determined      |
| YMR307W | GAS1   | RLS Determined      |
| YDR283C | GCN2   | RLS Determined      |
| YEL009C | GCN4   | RLS Determined      |
| YKL104C | GFA1   | Essential           |
| YML094W | GIM5   | RLS Determined      |
| YDR507C | GIN4   | RLS Determined      |
| YCL040W | GLK1   | RLS Determined      |
| YER020W | GPA2   | Input               |
| YDR331W | GPI8   | Essential           |
| YKL109W | HAP4   | Input               |
| YJL033W | HCA4   | Essential           |
| YGL194C | HOS2   | RLS Determined      |
| YPL240C | HSP82  | RLS Determined      |
| YOL012C | HTZ1   | RLS Determined      |
| YDR342C | HXT7   | No Deletion/No Grow |
| YEL034W | HYP2   | Essential           |
| YOR136W | IDH2   | Input               |
| YNL009W | IDP3   | RLS Determined      |
| YLR095C | IOC2   | RLS Determined      |
| YJR091C | JSN1   | RLS Determined      |
| YER110C | KAP123 | RLS Determined      |
| YHL003C | LAG1   | Input               |
| YOL025W | LAG2   | Input               |
| YFR001W | LOC1   | RLS Determined      |
| YDR060W | MAK21  | Essential           |
| YLR163C | MAS1   | Essential           |
| YBR084W | MIS1   | RLS Determined      |
| YIL106W | MOB1   | Essential           |
| YGL178W | MPT5   | Input               |
| YPR030W | MRG19  | Input               |
| YNL124W | NAF1   | Essential           |
| YKR048C | NAP1   | RLS Determined      |
| YMR309C | NIP1   | Essential           |
| YHR170W | NMD3   | Essential           |
| YLR285W | NNT1   | Input               |
| YNR053C | NOG2   | Essential           |
| YNL110C | NOP15  | Essential           |
| YNL061W | NOP2   | Essential           |

---

---

|          |        |                     |
|----------|--------|---------------------|
| YPL043W  | NOP4   | Essential           |
| YOR209C  | NPT1   | Input               |
| YDR288W  | NSE3   | Essential           |
| YDR001C  | NTH1   | RLS Determined      |
| YMR047C  | NUP116 | Essential           |
| YBR060C  | ORC2   | Essential           |
| YLR350W  | ORM2   | RLS Determined      |
| YGR087C  | PDC6   | RLS Determined      |
| YKL043W  | PHD1   | RLS Determined      |
| YGL008C  | PMA1   | Essential           |
| YGL037C  | PNC1   | Input               |
| YDR473C  | PRP3   | Essential           |
| YER095W  | RAD51  | RLS Determined      |
| YPL153C  | RAD53  | Essential           |
| YNL216W  | RAP1   | Essential           |
| YOR101W  | RAS1   | Input               |
| YNL0986  | RAS2   | Input               |
| YDR195W  | REF2   | RLS Determined      |
| YDR028C  | REG1   | RLS Determined      |
| YBR267W  | REI1   | Input               |
| YFR051C  | RET2   | Essential           |
| YCR028CA | RIM1   | RLS Determined      |
| YMR061W  | RNA14  | Essential           |
| YLR371W  | ROM2   | Input               |
| YPR190C  | RPC82  | Essential           |
| YMR242C  | RPL20A | RLS Determined      |
| YOR312C  | RPL20B | RLS Determined      |
| YLR406C  | RPL31B | RLS Determined      |
| YLR448W  | RPL6B  | Input               |
| YHR200W  | RPN10  | RLS Determined      |
| YBL103C  | RTG3   | Input               |
| YDR233C  | RTN1   | RLS Determined      |
| YCR009C  | RVS161 | RLS Determined      |
| YDR388W  | RVS167 | No Deletion/No Grow |
| YDR129C  | SAC6   | RLS Determined      |
| YOR367W  | SCP1   | Input               |
| YER120W  | SCS2   | RLS Determined      |
| YGR245C  | SDA1   | Essential           |
| YGL137W  | SEC27  | Essential           |
| YIL076W  | SEC28  | RLS Determined      |
| YDL195W  | SEC31  | Essential           |
| YHR098C  | SFB3   | No Deletion/No Grow |
| YPR161C  | SGV1   | Essential           |
| YGL208W  | SIP2   | RLS Determined      |
| YJL089W  | SIP4   | RLS Determined      |
| YDL042C  | SIR2   | Input               |

---

---

|          |         |                     |
|----------|---------|---------------------|
| YDR227W  | SIR4    | Input               |
| YHR149C  | SKG6    | No Deletion/No Grow |
| YBL007C  | SLA1    | RLS Determined      |
| YGR229C  | SMI1    | RLS Determined      |
| YDR510W  | SMT3    | Essential           |
| YDR477W  | SNF1    | RLS Determined      |
| YOR290C  | SNF2    | RLS Determined      |
| YGL115W  | SNF4    | Input               |
| YBR289W  | SNF5    | RLS Determined      |
| YDR006C  | SOK1    | RLS Determined      |
| YJR010CA | SPC1    | RLS Determined      |
| YDR523C  | SPS1    | RLS Determined      |
| YML010W  | SPT5    | Essential           |
| YDR293C  | SSD1    | Input               |
| YPL042C  | SSN3    | RLS Determined      |
| YPR163C  | STM1    | RLS Determined      |
| YBR231C  | SWC5    | RLS Determined      |
| YJL187C  | SWE1    | RLS Determined      |
| YPL016W  | SWI1    | Essential           |
| YDR146C  | SWI5    | RLS Determined      |
| YMR149W  | SWP1    | Essential           |
| YDR334W  | SWR1    | RLS Determined      |
| YPL129W  | TAF14   | RLS Determined      |
| YGR162W  | TIF4631 | RLS Determined      |
| YPR016C  | TIF6    | Essential           |
| YKL056C  | TMA19   | RLS Determined      |
| YDR457W  | TOM1    | RLS Determined      |
| YOL006C  | TOP1    | RLS Determined      |
| YJR066W  | TOR1    | Input               |
| YPL203W  | TPK2    | Input               |
| YHR099W  | TRA1    | Essential           |
| YCR084C  | TUP1    | RLS Determined      |
| YER151C  | UBP3    | RLS Determined      |
| YDR207C  | UME6    | RLS Determined      |
| YNL229C  | URE2    | Input               |
| YML041C  | VPS71   | RLS Determined      |
| YOR043W  | WHI2    | RLS Determined      |
| YNL107W  | YAF9    | RLS Determined      |
| YAR010C  | YAR010C | No Deletion/No Grow |
| YBR238C  | YBR238C | Input               |
| YBR255W  | YBR255W | Input               |
| YGR234W  | YHB1    | RLS Determined      |
| YLR200W  | YKE2    | RLS Determined      |
| YOR135C  | YOR135C | Input               |
| YBR183W  | YPC1    | RLS Determined      |
| YDR381W  | YRA1    | Essential           |

---

---

|         |       |                |
|---------|-------|----------------|
| YHR016C | YSC84 | RLS Determined |
| YMR273C | ZDS1  | Input          |

---
