# Supplementary material for: Shortest-Path Network Analysis Is a Useful Approach toward Identifying Genetic Determinants of Longevity
Source: PubMed Central journal article supplement (PMC2583956; doi:10.1371/journal.pone.0003802), 2008-11-25
Supplement: pone.0003802.s006.pdf [file pone.0003802.s006.pdf]

**Table S4. Replicative life span analysis of single-gene deletion strains corresponding to genes in the binding shortest-path longevity network.** Replicative life span was determined for each single gene deletion strain ( $\Delta$ ) present in the *MAT $\alpha$*  ORF deletion collection that corresponds to a gene in the shortest-path longevity network (SPLN). Replicative life span data for each haploid deletion ( $\Delta$ ) and experiment matched wild type mother cells are shown as mean replicative life span with number of cells assayed in parentheses. *P*-value is calculated by a Wilcoxon Rank-Sum test. Pooled haploid data refers to pooled *MAT $\alpha$*  and *MAT $\alpha$*  deletion and wild type data.

| ORF     | GENE | <i>MAT<math>\alpha</math></i> |           |         | <i>MAT<math>\alpha</math></i> |            |         | Pooled haploid mating types |            |         |
|---------|------|-------------------------------|-----------|---------|-------------------------------|------------|---------|-----------------------------|------------|---------|
|         |      | $\Delta$                      | BY4742    | p-value | $\Delta$                      | BY4741     | p-value | $\Delta$                    | WT Pooled  | p-value |
| YCR088W | ABP1 | 30.5 (40)                     | 25.4 (45) | 1.1E-02 | 25.5 (80)                     | 30.4 (100) | 4.0E-04 | 27.2 (120)                  | 28.8 (145) | 1.4E-01 |
| YDR448W | ADA2 | 11.6 (5)                      | 24.2 (5)  | 7.9E-03 | 0 (0)                         | 0 (0)      | 0.0E+00 | 11.6 (5)                    | 24.2 (5)   | 7.9E-03 |
| YDR216W | ADR1 | 17.2 (5)                      | 25.6 (5)  | 7.9E-03 | 0 (0)                         | 0 (0)      | 0.0E+00 | 17.2 (5)                    | 25.6 (5)   | 7.9E-03 |
| YCL025C | AGP1 | 19.4 (5)                      | 22.8 (5)  | 2.9E-01 | 0 (0)                         | 0 (0)      | 0.0E+00 | 19.4 (5)                    | 22.8 (5)   | 2.9E-01 |
| YKL135C | APL2 | 18.8 (5)                      | 25.6 (5)  | 4.0E-02 | 0 (0)                         | 0 (0)      | 0.0E+00 | 18.8 (5)                    | 25.6 (5)   | 4.0E-02 |
| YDR101C | ARX1 | 24.4 (25)                     | 24.5 (35) | 7.6E-01 | 0 (0)                         | 0 (0)      | 0.0E+00 | 24.4 (25)                   | 24.5 (35)  | 7.6E-01 |
| YNL101W | AVT4 | 19.2 (5)                      | 36.4 (5)  | 1.0E-01 | 0 (0)                         | 0 (0)      | 0.0E+00 | 19.2 (5)                    | 36.4 (5)   | 1.0E-01 |
| YER177W | BMH1 | 20.1 (10)                     | 22.7 (10) | 6.8E-01 | 0 (0)                         | 0 (0)      | 0.0E+00 | 20.1 (10)                   | 22.7 (10)  | 6.8E-01 |
| YDR099W | BMH2 | 26.1 (15)                     | 28.5 (15) | 3.0E-01 | 0 (0)                         | 0 (0)      | 0.0E+00 | 26.1 (15)                   | 28.5 (15)  | 3.0E-01 |
| YIL159W | BNR1 | 25 (5)                        | 23.6 (5)  | 1.0E+00 | 0 (0)                         | 0 (0)      | 0.0E+00 | 25 (5)                      | 23.6 (5)   | 1.0E+00 |
| YBL085W | BOI1 | 25.3 (25)                     | 26.4 (25) | 4.2E-01 | 0 (0)                         | 0 (0)      | 0.0E+00 | 25.3 (25)                   | 26.4 (25)  | 4.2E-01 |
| YER114C | BOI2 | 35.2 (45)                     | 25.8 (65) | 1.0E-05 | 30.1 (80)                     | 28.7 (100) | 3.8E-01 | 31.9 (125)                  | 27.6 (165) | 4.5E-04 |
| YHR142W | CHS7 | 18 (5)                        | 22.4 (5)  | 4.6E-01 | 0 (0)                         | 0 (0)      | 0.0E+00 | 18 (5)                      | 22.4 (5)   | 4.6E-01 |
| YNL298W | CLA4 | 10 (25)                       | 23.8 (45) | 2.6E-09 | 0 (0)                         | 0 (0)      | 0.0E+00 | 10 (25)                     | 23.8 (45)  | 2.6E-09 |
| YPR119W | CLB2 | 28.7 (65)                     | 24.6 (65) | 2.2E-02 | 30.9 (40)                     | 30 (80)    | 9.4E-01 | 29.5 (105)                  | 27.6 (145) | 3.3E-01 |
| YBR036C | CSG2 | 18.8 (5)                      | 29.4 (5)  | 2.4E-01 | 0 (0)                         | 0 (0)      | 0.0E+00 | 18.8 (5)                    | 29.4 (5)   | 2.4E-01 |
| YJR048W | CYC1 | 13.2 (5)                      | 31.4 (5)  | 7.9E-03 | 0 (0)                         | 0 (0)      | 0.0E+00 | 13.2 (5)                    | 31.4 (5)   | 7.9E-03 |
| YGR155W | CYS4 | 14.4 (5)                      | 20.8 (5)  | 2.9E-01 | 0 (0)                         | 0 (0)      | 0.0E+00 | 14.4 (5)                    | 20.8 (5)   | 2.9E-01 |
| YKL087C | CYT2 | 17.9 (46)                     | 23.9 (65) | 4.0E-03 | 0 (0)                         | 0 (0)      | 0.0E+00 | 17.9 (46)                   | 23.9 (65)  | 4.0E-03 |
| YDR385W | EFT2 | 22.3 (15)                     | 21.8 (25) | 7.2E-01 | 0 (0)                         | 0 (0)      | 0.0E+00 | 22.3 (15)                   | 21.8 (25)  | 7.2E-01 |
| YOR144C | ELG1 | 25 (5)                        | 32.8 (5)  | 3.8E-01 | 0 (0)                         | 0 (0)      | 0.0E+00 | 25 (5)                      | 32.8 (5)   | 3.8E-01 |

|          |        |             |             |         |            |            |         |             |             |         |
|----------|--------|-------------|-------------|---------|------------|------------|---------|-------------|-------------|---------|
| YPL101W  | ELP4   | 34.5 (45)   | 25.6 (65)   | 1.2E-05 | 31.3 (80)  | 27.9 (120) | 9.0E-03 | 32.4 (125)  | 27.1 (185)  | 2.5E-06 |
| YLR342W  | FKS1   | 24 (5)      | 20.6 (5)    | 5.2E-01 | 0 (0)      | 0 (0)      | 0.0E+00 | 24 (5)      | 20.6 (5)    | 5.2E-01 |
| YER027C  | GAL83  | 13.2 (5)    | 20.8 (5)    | 4.2E-01 | 0 (0)      | 0 (0)      | 0.0E+00 | 13.2 (5)    | 20.8 (5)    | 4.2E-01 |
| YMR307W  | GAS1   | 18.6 (20)   | 24.1 (25)   | 8.2E-03 | 0 (0)      | 0 (0)      | 0.0E+00 | 18.6 (20)   | 24.1 (25)   | 8.2E-03 |
| YDR283C  | GCN2   | 25.7 (495)  | 27 (565)    | 2.8E-02 | 23.3 (180) | 28.8 (220) | 1.1E-08 | 25.1 (675)  | 27.5 (785)  | 8.5E-07 |
| YEL009C  | GCN4   | 26.9 (1165) | 25.1 (1125) | 1.3E-04 | 26.3 (240) | 26.5 (320) | 7.1E-01 | 26.8 (1405) | 25.4 (1445) | 1.6E-03 |
| YML094W  | GIM5   | 19 (5)      | 29.6 (5)    | 1.5E-01 | 0 (0)      | 0 (0)      | 0.0E+00 | 19 (5)      | 29.6 (5)    | 1.5E-01 |
| YDR507C  | GIN4   | 14.9 (25)   | 22.6 (25)   | 4.1E-04 | 0 (0)      | 0 (0)      | 0.0E+00 | 14.9 (25)   | 22.6 (25)   | 4.1E-04 |
| YCL040W  | GLK1   | 27.9 (65)   | 25.9 (105)  | 1.8E-01 | 24.7 (40)  | 28.3 (40)  | 1.7E-02 | 26.7 (105)  | 26.5 (145)  | 8.5E-01 |
| YGL194C  | HOS2   | 27.8 (65)   | 25.8 (105)  | 1.5E-01 | 0 (0)      | 0 (0)      | 0.0E+00 | 27.8 (65)   | 25.8 (105)  | 1.5E-01 |
| YPL240C  | HSP82  | 27.7 (25)   | 26.3 (45)   | 6.5E-01 | 0 (0)      | 0 (0)      | 0.0E+00 | 27.7 (25)   | 26.3 (45)   | 6.5E-01 |
| YOL012C  | HTZ1   | 19.2 (5)    | 30 (5)      | 1.5E-01 | 0 (0)      | 0 (0)      | 0.0E+00 | 19.2 (5)    | 30 (5)      | 1.5E-01 |
| YNL009W  | IDP3   | 29.9 (65)   | 26.2 (65)   | 2.2E-02 | 23.5 (80)  | 28 (100)   | 3.8E-04 | 26.3 (145)  | 27.3 (165)  | 2.6E-01 |
| YLR095C  | IOC2   | 23.7 (25)   | 27.9 (25)   | 9.8E-02 | 0 (0)      | 0 (0)      | 0.0E+00 | 23.7 (25)   | 27.9 (25)   | 9.8E-02 |
| YJR091C  | JSN1   | 22.4 (5)    | 28.4 (5)    | 3.3E-01 | 0 (0)      | 0 (0)      | 0.0E+00 | 22.4 (5)    | 28.4 (5)    | 3.3E-01 |
| YER110C  | KAP123 | 22.8 (5)    | 20.4 (5)    | 5.2E-01 | 0 (0)      | 0 (0)      | 0.0E+00 | 22.8 (5)    | 20.4 (5)    | 5.2E-01 |
| YFR001W  | LOC1   | 36.7 (45)   | 25.9 (45)   | 9.3E-05 | 0 (0)      | 0 (0)      | 0.0E+00 | 36.7 (45)   | 25.9 (45)   | 9.3E-05 |
| YBR084W  | MIS1   | 25.6 (5)    | 28.6 (5)    | 8.4E-01 | 0 (0)      | 0 (0)      | 0.0E+00 | 25.6 (5)    | 28.6 (5)    | 8.4E-01 |
| YKR048C  | NAP1   | 24.6 (45)   | 27.2 (45)   | 6.3E-02 | 0 (0)      | 0 (0)      | 0.0E+00 | 24.6 (45)   | 27.2 (45)   | 6.3E-02 |
| YDR001C  | NTH1   | 29.6 (65)   | 26.1 (105)  | 5.8E-02 | 25.3 (60)  | 29.5 (80)  | 1.5E-02 | 27.6 (125)  | 27.5 (185)  | 7.7E-01 |
| YLR350W  | ORM2   | 22.6 (10)   | 22.7 (10)   | 7.0E-01 | 0 (0)      | 0 (0)      | 0.0E+00 | 22.6 (10)   | 22.7 (10)   | 7.0E-01 |
| YGR087C  | PDC6   | 24.5 (25)   | 24.2 (45)   | 7.6E-01 | 0 (0)      | 0 (0)      | 0.0E+00 | 24.5 (25)   | 24.2 (45)   | 7.6E-01 |
| YKL043W  | PHD1   | 29 (25)     | 23.8 (25)   | 1.6E-02 | 27.5 (40)  | 26.2 (80)  | 4.8E-01 | 28 (65)     | 25.6 (105)  | 7.4E-02 |
| YER095W  | RAD51  | 8.2 (5)     | 22.2 (5)    | 7.9E-02 | 0 (0)      | 0 (0)      | 0.0E+00 | 8.2 (5)     | 22.2 (5)    | 7.9E-02 |
| YDR195W  | REF2   | 18.8 (5)    | 25.6 (5)    | 1.5E-01 | 0 (0)      | 0 (0)      | 0.0E+00 | 18.8 (5)    | 25.6 (5)    | 1.5E-01 |
| YDR028C  | REG1   | 19.2 (5)    | 26.4 (5)    | 9.5E-02 | 0 (0)      | 0 (0)      | 0.0E+00 | 19.2 (5)    | 26.4 (5)    | 9.5E-02 |
| YCR028CA | RIM1   | 29 (65)     | 25.5 (85)   | 2.4E-02 | 33.9 (100) | 28.6 (160) | 3.1E-04 | 32 (165)    | 27.5 (245)  | 4.9E-05 |
| YMR242C  | RPL20A | 15.7 (55)   | 26.2 (65)   | 3.0E-09 | 21.6 (20)  | 21.3 (20)  | 8.5E-01 | 17.3 (75)   | 25 (85)     | 6.4E-08 |
| YOR312C  | RPL20B | 36 (345)    | 26.4 (345)  | 4.8E-30 | 37.2 (100) | 25.3 (80)  | 2.1E-10 | 36.3 (445)  | 26.2 (425)  | 4.6E-39 |
| YLR406C  | RPL31B | 22.3 (45)   | 24.2 (45)   | 3.5E-01 | 0 (0)      | 0 (0)      | 0.0E+00 | 22.3 (45)   | 24.2 (45)   | 3.5E-01 |
| YHR200W  | RPN10  | 18.8 (5)    | 22.8 (5)    | 5.4E-01 | 0 (0)      | 0 (0)      | 0.0E+00 | 18.8 (5)    | 22.8 (5)    | 5.4E-01 |

|          |         |            |            |         |            |            |         |            |            |         |
|----------|---------|------------|------------|---------|------------|------------|---------|------------|------------|---------|
| YDR233C  | RTN1    | 29.8 (65)  | 25.8 (85)  | 9.2E-03 | 27.8 (80)  | 30.1 (120) | 1.9E-01 | 28.7 (145) | 28.3 (205) | 5.8E-01 |
| YCR009C  | RVS161  | 29.4 (45)  | 25.9 (65)  | 2.5E-02 | 13.2 (40)  | 29.7 (80)  | 4.8E-12 | 21.8 (85)  | 28 (145)   | 1.2E-04 |
| YDR129C  | SAC6    | 14.7 (30)  | 25.8 (60)  | 2.4E-05 | 0 (0)      | 0 (0)      | 0.0E+00 | 14.7 (30)  | 25.8 (60)  | 2.4E-05 |
| YER120W  | SCS2    | 16.6 (5)   | 20.4 (5)   | 6.3E-01 | 0 (0)      | 0 (0)      | 0.0E+00 | 16.6 (5)   | 20.4 (5)   | 6.3E-01 |
| YIL076W  | SEC28   | 31.2 (35)  | 25.6 (65)  | 5.7E-03 | 29.7 (60)  | 31 (80)    | 5.2E-01 | 30.3 (95)  | 28.6 (145) | 2.3E-01 |
| YGL208W  | SIP2    | 31.1 (125) | 26.4 (145) | 2.6E-04 | 30.8 (40)  | 28.3 (40)  | 2.1E-01 | 31 (165)   | 26.8 (185) | 2.1E-04 |
| YJL089W  | SIP4    | 17.4 (5)   | 18.8 (5)   | 8.4E-01 | 0 (0)      | 0 (0)      | 0.0E+00 | 17.4 (5)   | 18.8 (5)   | 8.4E-01 |
| YBL007C  | SLA1    | 8.6 (25)   | 21.9 (25)  | 3.2E-08 | 0 (0)      | 0 (0)      | 0.0E+00 | 8.6 (25)   | 21.9 (25)  | 3.2E-08 |
| YGR229C  | SMI1    | 22.8 (5)   | 21.8 (5)   | 5.2E-01 | 0 (0)      | 0 (0)      | 0.0E+00 | 22.8 (5)   | 21.8 (5)   | 5.2E-01 |
| YDR477W  | SNF1    | 38.8 (40)  | 25.5 (40)  | 2.4E-06 | 26.1 (100) | 27 (120)   | 3.5E-01 | 29.8 (140) | 26.6 (160) | 4.9E-02 |
| YOR290C  | SNF2    | 24.8 (5)   | 28.6 (5)   | 5.7E-01 | 0 (0)      | 0 (0)      | 0.0E+00 | 24.8 (5)   | 28.6 (5)   | 5.7E-01 |
| YBR289W  | SNF5    | 27.8 (25)  | 25.4 (45)  | 2.3E-01 | 0 (0)      | 0 (0)      | 0.0E+00 | 27.8 (25)  | 25.4 (45)  | 2.3E-01 |
| YDR006C  | SOK1    | 39.8 (85)  | 25.9 (105) | 3.4E-14 | 35 (100)   | 28.8 (120) | 1.8E-05 | 37.2 (185) | 27.4 (225) | 1.4E-17 |
| YJR010CA | SPC1    | 27.8 (25)  | 27.6 (25)  | 1.0E+00 | 0 (0)      | 0 (0)      | 0.0E+00 | 27.8 (25)  | 27.6 (25)  | 1.0E+00 |
| YDR523C  | SPS1    | 31.5 (45)  | 25.4 (45)  | 9.2E-03 | 33.9 (80)  | 29.8 (80)  | 3.8E-02 | 33 (125)   | 28.2 (125) | 2.2E-03 |
| YPL042C  | SSN3    | 21.2 (55)  | 26.6 (105) | 1.1E-04 | 0 (0)      | 0 (0)      | 0.0E+00 | 21.2 (55)  | 26.6 (105) | 1.1E-04 |
| YPR163C  | STM1    | 17.9 (25)  | 22.8 (25)  | 1.6E-01 | 0 (0)      | 0 (0)      | 0.0E+00 | 17.9 (25)  | 22.8 (25)  | 1.6E-01 |
| YBR231C  | SWC5    | 15.9 (10)  | 29.6 (10)  | 1.7E-03 | 0 (0)      | 0 (0)      | 0.0E+00 | 15.9 (10)  | 29.6 (10)  | 1.7E-03 |
| YJL187C  | SWE1    | 15.4 (5)   | 22 (5)     | 2.0E-01 | 0 (0)      | 0 (0)      | 0.0E+00 | 15.4 (5)   | 22 (5)     | 2.0E-01 |
| YDR146C  | SWI5    | 31 (45)    | 25.7 (85)  | 1.2E-02 | 0 (0)      | 0 (0)      | 0.0E+00 | 31 (45)    | 25.7 (85)  | 1.2E-02 |
| YDR334W  | SWR1    | 24.1 (30)  | 26.9 (30)  | 1.1E-01 | 0 (0)      | 0 (0)      | 0.0E+00 | 24.1 (30)  | 26.9 (30)  | 1.1E-01 |
| YPL129W  | TAF14   | 29.6 (65)  | 25.7 (105) | 1.2E-02 | 14.9 (60)  | 31 (80)    | 2.7E-12 | 22.6 (125) | 28 (185)   | 1.3E-04 |
| YGR162W  | TIF4631 | 27.9 (95)  | 23.7 (145) | 6.6E-03 | 33.1 (100) | 27 (100)   | 2.8E-04 | 30.6 (195) | 25 (245)   | 4.3E-07 |
| YKL056C  | TMA19   | 33.4 (45)  | 25.3 (65)  | 2.2E-04 | 37.4 (60)  | 30 (80)    | 1.6E-03 | 35.7 (105) | 27.9 (145) | 2.0E-06 |
| YDR457W  | TOM1    | 30.1 (45)  | 25.4 (65)  | 2.1E-02 | 31.4 (100) | 28.6 (160) | 8.8E-02 | 31 (145)   | 27.7 (225) | 8.7E-03 |
| YOL006C  | TOP1    | 12.4 (5)   | 30 (5)     | 7.9E-03 | 0 (0)      | 0 (0)      | 0.0E+00 | 12.4 (5)   | 30 (5)     | 7.9E-03 |
| YCR084C  | TUP1    | 23.8 (20)  | 24.2 (25)  | 8.4E-01 | 0 (0)      | 0 (0)      | 0.0E+00 | 23.8 (20)  | 24.2 (25)  | 8.4E-01 |
| YER151C  | UBP3    | 27.7 (65)  | 25.1 (105) | 2.2E-01 | 0 (0)      | 0 (0)      | 0.0E+00 | 27.7 (65)  | 25.1 (105) | 2.2E-01 |
| YDR207C  | UME6    | 14.6 (5)   | 25.6 (5)   | 7.9E-03 | 0 (0)      | 0 (0)      | 0.0E+00 | 14.6 (5)   | 25.6 (5)   | 7.9E-03 |
| YML041C  | VPS71   | 12.6 (5)   | 20.8 (5)   | 1.5E-01 | 0 (0)      | 0 (0)      | 0.0E+00 | 12.6 (5)   | 20.8 (5)   | 1.5E-01 |
| YOR043W  | WHI2    | 13.6 (5)   | 24 (5)     | 7.9E-03 | 0 (0)      | 0 (0)      | 0.0E+00 | 13.6 (5)   | 24 (5)     | 7.9E-03 |

|         |       |           |           |         |            |            |         |            |            |         |
|---------|-------|-----------|-----------|---------|------------|------------|---------|------------|------------|---------|
| YNL107W | YAF9  | 27.8 (25) | 26 (25)   | 7.4E-01 | 0 (0)      | 0 (0)      | 0.0E+00 | 27.8 (25)  | 26 (25)    | 7.4E-01 |
| YGR234W | YHB1  | 21.8 (5)  | 21.8 (5)  | 7.6E-01 | 0 (0)      | 0 (0)      | 0.0E+00 | 21.8 (5)   | 21.8 (5)   | 7.6E-01 |
| YLR200W | YKE2  | 24.5 (25) | 25.4 (25) | 7.0E-01 | 0 (0)      | 0 (0)      | 0.0E+00 | 24.5 (25)  | 25.4 (25)  | 7.0E-01 |
| YBR183W | YPC1  | 29 (45)   | 26 (85)   | 1.4E-01 | 24.1 (40)  | 27.9 (40)  | 4.0E-02 | 26.7 (85)  | 26.6 (125) | 8.8E-01 |
| YHR016C | YSC84 | 28.7 (40) | 24.1 (65) | 1.9E-02 | 27.9 (100) | 28.9 (120) | 3.3E-01 | 28.1 (140) | 27.2 (185) | 5.1E-01 |
