# Supplementary material for: Shortest-Path Network Analysis Is a Useful Approach toward Identifying Genetic Determinants of Longevity
Source: PubMed Central journal article supplement (PMC2583956; doi:10.1371/journal.pone.0003802), 2008-11-25
Supplement: pone.0003802.s007.pdf [file pone.0003802.s007.pdf]

**Table S5. Replicative life span analysis of 564 randomly selected single-gene deletion strains.** Preliminary replicative life span (RLS) analysis of these 564 single-gene deletion strains was previously described [1]. The data presented here include the previously reported RLS data for these strains and additional RLS data for these strains obtained since publication of the prior data set as part of an ongoing genome-wide study of RLS across the entire yeast ORF deletion collection [2]. RLS for each haploid deletion ( $\Delta$ ) and experiment matched wild type mother cells are shown as mean replicative life span with number of cells assayed in parentheses. *P*-value is calculated by a Wilcoxon Rank-Sum test. Pooled haploid data refers to pooled *MAT $\alpha$*  and *MATa* deletion and wild type data.

| ORF     | GENE  | <i>MAT<math>\alpha</math></i> |            |         | <i>MATa</i> |            |         | Pooled haploid mating types |            |         |
|---------|-------|-------------------------------|------------|---------|-------------|------------|---------|-----------------------------|------------|---------|
|         |       | $\Delta$                      | BY4742     | p-value | $\Delta$    | BY4741     | p-value | $\Delta$                    | WT Pooled  | p-value |
| YMR056C | AAC1  | 25.3 (105)                    | 23.9 (135) | 2.2E-01 | 28.7 (100)  | 26.8 (120) | 1.3E-01 | 26.9 (205)                  | 25.3 (255) | 2.7E-02 |
| YCR107W | AAD3  | 27.4 (20)                     | 23.8 (20)  | 3.7E-01 | 0 (0)       | 0 (0)      | 0.0E+00 | 27.4 (20)                   | 23.8 (20)  | 3.7E-01 |
| YHR047C | AAP1  | 15.8 (5)                      | 22.4 (5)   | 1.9E-01 | 0 (0)       | 0 (0)      | 0.0E+00 | 15.8 (5)                    | 22.4 (5)   | 1.9E-01 |
| YAL054C | ACS1  | 24.5 (10)                     | 26.1 (10)  | 5.7E-01 | 0 (0)       | 0 (0)      | 0.0E+00 | 24.5 (10)                   | 26.1 (10)  | 5.7E-01 |
| YGR061C | ADE6  | 25.7 (25)                     | 28.4 (25)  | 4.0E-01 | 0 (0)       | 0 (0)      | 0.0E+00 | 25.7 (25)                   | 28.4 (25)  | 4.0E-01 |
| YER170W | ADK2  | 23.4 (10)                     | 22.7 (10)  | 6.5E-01 | 0 (0)       | 0 (0)      | 0.0E+00 | 23.4 (10)                   | 22.7 (10)  | 6.5E-01 |
| YDR085C | AFR1  | 23.4 (10)                     | 29.6 (10)  | 8.1E-02 | 0 (0)       | 0 (0)      | 0.0E+00 | 23.4 (10)                   | 29.6 (10)  | 8.1E-02 |
| YHR093W | AHT1  | 28.4 (15)                     | 25 (25)    | 5.4E-01 | 0 (0)       | 0 (0)      | 0.0E+00 | 28.4 (15)                   | 25 (25)    | 5.4E-01 |
| YDR264C | AKR1  | 14.7 (25)                     | 25.8 (25)  | 9.5E-06 | 0 (0)       | 0 (0)      | 0.0E+00 | 14.7 (25)                   | 25.8 (25)  | 9.5E-06 |
| YMR169C | ALD3  | 29.4 (10)                     | 30 (10)    | 9.1E-01 | 0 (0)       | 0 (0)      | 0.0E+00 | 29.4 (10)                   | 30 (10)    | 9.1E-01 |
| YDR111C | ALT2  | 19.7 (10)                     | 29.6 (10)  | 8.2E-02 | 0 (0)       | 0 (0)      | 0.0E+00 | 19.7 (10)                   | 29.6 (10)  | 8.2E-02 |
| YDR242W | AMD2  | 23.8 (30)                     | 25.4 (30)  | 2.8E-01 | 0 (0)       | 0 (0)      | 0.0E+00 | 23.8 (30)                   | 25.4 (30)  | 2.8E-01 |
| YBR231C | AOR1  | 15.9 (10)                     | 29.6 (10)  | 1.7E-03 | 0 (0)       | 0 (0)      | 0.0E+00 | 15.9 (10)                   | 29.6 (10)  | 1.7E-03 |
| YHR018C | ARG4  | 29 (25)                       | 26.3 (25)  | 5.4E-01 | 0 (0)       | 0 (0)      | 0.0E+00 | 29 (25)                     | 26.3 (25)  | 5.4E-01 |
| YBR249C | ARO4  | 26.5 (15)                     | 28.5 (15)  | 9.7E-01 | 0 (0)       | 0 (0)      | 0.0E+00 | 26.5 (15)                   | 28.5 (15)  | 9.7E-01 |
| YHR137W | ARO9  | 20 (5)                        | 22.4 (5)   | 8.4E-01 | 0 (0)       | 0 (0)      | 0.0E+00 | 20 (5)                      | 22.4 (5)   | 8.4E-01 |
| YHR129C | ARP1  | 15.7 (20)                     | 24.5 (25)  | 3.3E-03 | 0 (0)       | 0 (0)      | 0.0E+00 | 15.7 (20)                   | 24.5 (25)  | 3.3E-03 |
| YDR101C | ARX1  | 24.4 (25)                     | 24.5 (35)  | 7.6E-01 | 0 (0)       | 0 (0)      | 0.0E+00 | 24.4 (25)                   | 24.5 (35)  | 7.6E-01 |
| YGR097W | ASK10 | 23.7 (10)                     | 29.3 (10)  | 3.1E-01 | 0 (0)       | 0 (0)      | 0.0E+00 | 23.7 (10)                   | 29.3 (10)  | 3.1E-01 |

|          |       |           |            |         |           |           |         |            |            |         |
|----------|-------|-----------|------------|---------|-----------|-----------|---------|------------|------------|---------|
| YDR321W  | ASP1  | 31.5 (20) | 26.9 (35)  | 3.5E-01 | 0 (0)     | 0 (0)     | 0.0E+00 | 31.5 (20)  | 26.9 (35)  | 3.5E-01 |
| YLR423C  | ATG17 | 18.4 (5)  | 28.8 (5)   | 2.9E-01 | 0 (0)     | 0 (0)     | 0.0E+00 | 18.4 (5)   | 28.8 (5)   | 2.9E-01 |
| YCL038C  | ATG22 | 25.7 (10) | 28.5 (10)  | 6.5E-01 | 0 (0)     | 0 (0)     | 0.0E+00 | 25.7 (10)  | 28.5 (10)  | 6.5E-01 |
| YLR431C  | ATG23 | 25.4 (20) | 26.9 (30)  | 3.4E-01 | 0 (0)     | 0 (0)     | 0.0E+00 | 25.4 (20)  | 26.9 (30)  | 3.4E-01 |
| YML081CA | ATP18 | 15.5 (14) | 24.5 (45)  | 1.1E-03 | 0 (0)     | 0 (0)     | 0.0E+00 | 15.5 (14)  | 24.5 (45)  | 1.1E-03 |
| YDR298C  | ATP5  | 23.4 (25) | 25.8 (25)  | 2.6E-01 | 0 (0)     | 0 (0)     | 0.0E+00 | 23.4 (25)  | 25.8 (25)  | 2.6E-01 |
| YOR113W  | AZF1  | 28 (45)   | 26 (45)    | 3.3E-01 | 0 (0)     | 0 (0)     | 0.0E+00 | 28 (45)    | 26 (45)    | 3.3E-01 |
| YOR134W  | BAG7  | 30.3 (20) | 25.4 (65)  | 1.6E-01 | 22.9 (20) | 22.1 (20) | 6.4E-01 | 26.6 (40)  | 24.6 (85)  | 5.7E-01 |
| YKR099W  | BAS1  | 35.6 (30) | 26.9 (30)  | 1.7E-03 | 23.1 (40) | 25.3 (60) | 1.8E-01 | 28.5 (70)  | 25.8 (90)  | 1.9E-01 |
| YNR058W  | BIO3  | 29.9 (20) | 24.8 (50)  | 1.3E-01 | 0 (0)     | 0 (0)     | 0.0E+00 | 29.9 (20)  | 24.8 (50)  | 1.3E-01 |
| YNR057C  | BIO4  | 21.8 (5)  | 28.8 (5)   | 4.5E-01 | 0 (0)     | 0 (0)     | 0.0E+00 | 21.8 (5)   | 28.8 (5)   | 4.5E-01 |
| YNR056C  | BIO5  | 20.8 (5)  | 28.8 (5)   | 3.8E-01 | 0 (0)     | 0 (0)     | 0.0E+00 | 20.8 (5)   | 28.8 (5)   | 3.8E-01 |
| YER177W  | BMH1  | 20.1 (10) | 22.7 (10)  | 6.8E-01 | 0 (0)     | 0 (0)     | 0.0E+00 | 20.1 (10)  | 22.7 (10)  | 6.8E-01 |
| YDR099W  | BMH2  | 26.1 (15) | 28.5 (15)  | 3.0E-01 | 0 (0)     | 0 (0)     | 0.0E+00 | 26.1 (15)  | 28.5 (15)  | 3.0E-01 |
| YNR051C  | BRE5  | 25.8 (80) | 26.6 (130) | 4.8E-01 | 32.8 (40) | 25.3 (60) | 6.6E-03 | 28.2 (120) | 26.1 (190) | 2.8E-01 |
| YDR275W  | BSC2  | 34.2 (25) | 27.6 (25)  | 3.4E-02 | 28.2 (20) | 29.7 (20) | 9.0E-01 | 31.6 (45)  | 28.5 (45)  | 2.0E-01 |
| YDR252W  | BTT1  | 24.8 (5)  | 29 (5)     | 7.3E-01 | 0 (0)     | 0 (0)     | 0.0E+00 | 24.8 (5)   | 29 (5)     | 7.3E-01 |
| YMR055C  | BUB2  | 22.6 (15) | 23.7 (15)  | 4.8E-01 | 0 (0)     | 0 (0)     | 0.0E+00 | 22.6 (15)  | 23.7 (15)  | 4.8E-01 |
| YLR353W  | BUD8  | 31.3 (25) | 24 (55)    | 5.2E-02 | 0 (0)     | 0 (0)     | 0.0E+00 | 31.3 (25)  | 24 (55)    | 5.2E-02 |
| YHR114W  | BZZ1  | 20.8 (5)  | 22.4 (5)   | 8.0E-01 | 0 (0)     | 0 (0)     | 0.0E+00 | 20.8 (5)   | 22.4 (5)   | 8.0E-01 |
| YLR438W  | CAR2  | 16.4 (5)  | 28.8 (5)   | 5.6E-02 | 0 (0)     | 0 (0)     | 0.0E+00 | 16.4 (5)   | 28.8 (5)   | 5.6E-02 |
| YDR270W  | CCC2  | 17.8 (5)  | 29 (5)     | 2.2E-01 | 0 (0)     | 0 (0)     | 0.0E+00 | 17.8 (5)   | 29 (5)     | 2.2E-01 |
| YDR254W  | CHL4  | 22.6 (10) | 27.4 (10)  | 2.7E-01 | 0 (0)     | 0 (0)     | 0.0E+00 | 22.6 (10)  | 27.4 (10)  | 2.7E-01 |
| YHR142W  | CHS7  | 18 (5)    | 22.4 (5)   | 4.6E-01 | 0 (0)     | 0 (0)     | 0.0E+00 | 18 (5)     | 22.4 (5)   | 4.6E-01 |
| YGR108W  | CLB1  | 24 (25)   | 28.4 (25)  | 1.5E-02 | 0 (0)     | 0 (0)     | 0.0E+00 | 24 (25)    | 28.4 (25)  | 1.5E-02 |
| YGR109C  | CLB6  | 24.1 (25) | 28.4 (25)  | 2.0E-01 | 0 (0)     | 0 (0)     | 0.0E+00 | 24.1 (25)  | 28.4 (25)  | 2.0E-01 |
| YLR433C  | CNA1  | 23.8 (20) | 26.9 (30)  | 1.9E-01 | 0 (0)     | 0 (0)     | 0.0E+00 | 23.8 (20)  | 26.9 (30)  | 1.9E-01 |
| YLL018CA | COX19 | 17.4 (5)  | 28.8 (5)   | 1.0E-01 | 0 (0)     | 0 (0)     | 0.0E+00 | 17.4 (5)   | 28.8 (5)   | 1.0E-01 |
| YIL111W  | COX5B | 27.8 (20) | 24.4 (20)  | 2.6E-01 | 0 (0)     | 0 (0)     | 0.0E+00 | 27.8 (20)  | 24.4 (20)  | 2.6E-01 |
| YHR057C  | CPR2  | 24 (5)    | 22.4 (5)   | 4.4E-01 | 0 (0)     | 0 (0)     | 0.0E+00 | 24 (5)     | 22.4 (5)   | 4.4E-01 |
| YDR304C  | CPR5  | 25.6 (5)  | 29 (5)     | 7.9E-01 | 0 (0)     | 0 (0)     | 0.0E+00 | 25.6 (5)   | 29 (5)     | 7.9E-01 |

|         |       |           |           |         |           |           |         |           |           |         |
|---------|-------|-----------|-----------|---------|-----------|-----------|---------|-----------|-----------|---------|
| YOR100C | CRC1  | 31.6 (25) | 25.3 (25) | 1.7E-02 | 25.9 (40) | 25.3 (60) | 6.7E-01 | 28.1 (65) | 25.3 (85) | 2.5E-01 |
| YLR429W | CRN1  | 30.2 (25) | 27.6 (25) | 5.6E-01 | 0 (0)     | 0 (0)     | 0.0E+00 | 30.2 (25) | 27.6 (25) | 5.6E-01 |
| YLR380W | CSR1  | 22.3 (15) | 23.7 (15) | 5.5E-01 | 0 (0)     | 0 (0)     | 0.0E+00 | 22.3 (15) | 23.7 (15) | 5.5E-01 |
| YDR256C | CTA1  | 29.9 (20) | 26.9 (35) | 4.3E-01 | 0 (0)     | 0 (0)     | 0.0E+00 | 29.9 (20) | 26.9 (35) | 4.3E-01 |
| YLR381W | CTF3  | 24.3 (10) | 22.7 (10) | 4.3E-01 | 0 (0)     | 0 (0)     | 0.0E+00 | 24.3 (10) | 22.7 (10) | 4.3E-01 |
| YHR109W | CTM1  | 22 (5)    | 22.4 (5)  | 1.0E+00 | 0 (0)     | 0 (0)     | 0.0E+00 | 22 (5)    | 22.4 (5)  | 1.0E+00 |
| YGR088W | CTT1  | 24.8 (25) | 28.4 (25) | 2.2E-01 | 0 (0)     | 0 (0)     | 0.0E+00 | 24.8 (25) | 28.4 (25) | 2.2E-01 |
| YAL012W | CYS3  | 30.2 (25) | 24.5 (25) | 1.9E-01 | 0 (0)     | 0 (0)     | 0.0E+00 | 30.2 (25) | 24.5 (25) | 1.9E-01 |
| YHR028C | DAP2  | 22 (5)    | 22.4 (5)  | 8.8E-01 | 0 (0)     | 0 (0)     | 0.0E+00 | 22 (5)    | 22.4 (5)  | 8.8E-01 |
| YOR180C | DCI1  | 29.8 (25) | 28.4 (25) | 8.3E-01 | 0 (0)     | 0 (0)     | 0.0E+00 | 29.8 (25) | 28.4 (25) | 8.3E-01 |
| YOR173W | DCS2  | 22.8 (10) | 29.3 (10) | 2.1E-01 | 0 (0)     | 0 (0)     | 0.0E+00 | 22.8 (10) | 29.3 (10) | 2.1E-01 |
| YOR163W | DDP1  | 27.8 (25) | 25.3 (25) | 2.2E-01 | 0 (0)     | 0 (0)     | 0.0E+00 | 27.8 (25) | 25.3 (25) | 2.2E-01 |
| YFL001W | DEG1  | 27.8 (35) | 24.5 (35) | 1.9E-01 | 0 (0)     | 0 (0)     | 0.0E+00 | 27.8 (35) | 24.5 (35) | 1.9E-01 |
| YLR348C | DIC1  | 23.3 (15) | 23.7 (15) | 7.7E-01 | 0 (0)     | 0 (0)     | 0.0E+00 | 23.3 (15) | 23.7 (15) | 7.7E-01 |
| YDR263C | DIN7  | 22.6 (5)  | 29 (5)    | 5.8E-01 | 0 (0)     | 0 (0)     | 0.0E+00 | 22.6 (5)  | 29 (5)    | 5.8E-01 |
| YIR004W | DJP1  | 28.6 (25) | 24 (55)   | 1.4E-01 | 0 (0)     | 0 (0)     | 0.0E+00 | 28.6 (25) | 24 (55)   | 1.4E-01 |
| YER179W | DMC1  | 22.3 (15) | 23.7 (15) | 7.7E-01 | 0 (0)     | 0 (0)     | 0.0E+00 | 22.3 (15) | 23.7 (15) | 7.7E-01 |
| YDR093W | DNF2  | 22.9 (15) | 25.2 (20) | 4.3E-01 | 0 (0)     | 0 (0)     | 0.0E+00 | 22.9 (15) | 25.2 (20) | 4.3E-01 |
| YDR069C | DOA4  | 15.8 (10) | 29.6 (10) | 1.3E-03 | 0 (0)     | 0 (0)     | 0.0E+00 | 15.8 (10) | 29.6 (10) | 1.3E-03 |
| YHR044C | DOG1  | 25.8 (15) | 25 (25)   | 9.1E-01 | 0 (0)     | 0 (0)     | 0.0E+00 | 25.8 (15) | 25 (25)   | 9.1E-01 |
| YHR043C | DOG2  | 19.8 (5)  | 22.4 (5)  | 6.9E-01 | 0 (0)     | 0 (0)     | 0.0E+00 | 19.8 (5)  | 22.4 (5)  | 6.9E-01 |
| YDR273W | DON1  | 19.8 (5)  | 29 (5)    | 4.2E-01 | 0 (0)     | 0 (0)     | 0.0E+00 | 19.8 (5)  | 29 (5)    | 4.2E-01 |
| YDR068W | DOS2  | 27.4 (20) | 26.9 (30) | 8.0E-01 | 0 (0)     | 0 (0)     | 0.0E+00 | 27.4 (20) | 26.9 (30) | 8.0E-01 |
| YDR121W | DPB4  | 25.9 (10) | 29.6 (10) | 3.3E-01 | 0 (0)     | 0 (0)     | 0.0E+00 | 25.9 (10) | 29.6 (10) | 3.3E-01 |
| YDR294C | DPL1  | 23.4 (25) | 27.6 (25) | 2.0E-01 | 0 (0)     | 0 (0)     | 0.0E+00 | 23.4 (25) | 27.6 (25) | 2.0E-01 |
| YDR284C | DPP1  | 31.7 (20) | 25.9 (55) | 2.4E-01 | 0 (0)     | 0 (0)     | 0.0E+00 | 31.7 (20) | 25.9 (55) | 2.4E-01 |
| YHR143W | DSE2  | 15.4 (5)  | 22.4 (5)  | 9.5E-02 | 0 (0)     | 0 (0)     | 0.0E+00 | 15.4 (5)  | 22.4 (5)  | 9.5E-02 |
| YNR067C | DSE4  | 27.1 (20) | 26.9 (30) | 9.4E-01 | 0 (0)     | 0 (0)     | 0.0E+00 | 27.1 (20) | 26.9 (30) | 9.4E-01 |
| YKR054C | DYN1  | 20.1 (30) | 23.5 (50) | 1.2E-01 | 0 (0)     | 0 (0)     | 0.0E+00 | 20.1 (30) | 23.5 (50) | 1.2E-01 |
| YHR132C | ECM14 | 22.2 (5)  | 22.4 (5)  | 9.8E-01 | 0 (0)     | 0 (0)     | 0.0E+00 | 22.2 (5)  | 22.4 (5)  | 9.8E-01 |
| YDR125C | ECM18 | 26.2 (20) | 29.6 (20) | 4.9E-01 | 0 (0)     | 0 (0)     | 0.0E+00 | 26.2 (20) | 29.6 (20) | 4.9E-01 |

|         |       |           |                |         |               |            |         |           |                |         |
|---------|-------|-----------|----------------|---------|---------------|------------|---------|-----------|----------------|---------|
| YLR390W | ECM19 | 23.2 (20) | 24.4 (20)      | 6.5E-01 | 0 (0)         | 0 (0)      | 0.0E+00 | 23.2 (20) | 24.4 (20)      | 6.5E-01 |
| YLR436C | ECM30 | 28.1 (20) | 26.9 (30)      | 7.2E-01 | 0 (0)         | 0 (0)      | 0.0E+00 | 28.1 (20) | 26.9 (30)      | 7.2E-01 |
| YER176W | ECM32 | 28.4 (25) | 25.4 (35)      | 4.8E-01 | 0 (0)         | 0 (0)      | 0.0E+00 | 28.4 (25) | 25.4 (35)      | 4.8E-01 |
| YLR443W | ECM7  | 13 (5)    | 28.8 (5)       | 9.5E-02 | 0 (0)         | 0 (0)      | 0.0E+00 | 13 (5)    | 28.8 (5)       | 9.5E-02 |
| YOR133W | EFT1  | 17.8 (15) | 23.8 (25)      | 1.5E-02 | 0 (0)         | 0 (0)      | 0.0E+00 | 17.8 (15) | 23.8 (25)      | 1.5E-02 |
| YOR144C | ELG1  | 25 (5)    | 32.8 (5)       | 3.8E-01 | 0 (0)         | 0 (0)      | 0.0E+00 | 25 (5)    | 32.8 (5)       | 3.8E-01 |
| YDR512C | EMI1  | 23.7 (30) | 25.3 (40)      | 3.4E-01 | 0 (0)         | 0 (0)      | 0.0E+00 | 23.7 (30) | 25.3 (40)      | 3.4E-01 |
| YIL005W | EPS1  | 24.4 (5)  | 29 (5)         | 6.9E-01 | 0 (0)         | 0 (0)      | 0.0E+00 | 24.4 (5)  | 29 (5)         | 6.9E-01 |
| YHR123W | EPT1  | 24.4 (15) | 25 (25)        | 6.3E-01 | 0 (0)         | 0 (0)      | 0.0E+00 | 24.4 (15) | 25 (25)        | 6.3E-01 |
| YHR110W | ERP5  | 15.6 (5)  | 22.4 (5)       | 2.5E-01 | 0 (0)         | 0 (0)      | 0.0E+00 | 15.6 (5)  | 22.4 (5)       | 2.5E-01 |
| YDR261C | EXG2  | 19.8 (5)  | 29 (5)         | 2.2E-01 | 0 (0)         | 0 (0)      | 0.0E+00 | 19.8 (5)  | 29 (5)         | 2.2E-01 |
| YMR052W | FAR3  | 26.8 (15) | 23.7 (15)      | 6.3E-01 | 0 (0)         | 0 (0)      | 0.0E+00 | 26.8 (15) | 23.7 (15)      | 6.3E-01 |
| YER183C | FAU1  | 24.8 (20) | 24.4 (20)      | 8.1E-01 | 0 (0)         | 0 (0)      | 0.0E+00 | 24.8 (20) | 24.4 (20)      | 8.1E-01 |
| YLR377C | FBP1  | 26.4 (45) | 24.5 (95)      | 3.9E-01 | 0 (0)         | 0 (0)      | 0.0E+00 | 26.4 (45) | 24.5 (95)      | 3.9E-01 |
| YMR058W | FET3  | 22 (10)   | 22.7 (10)      | 1.0E+00 | 0 (0)         | 0 (0)      | 0.0E+00 | 22 (10)   | 22.7 (10)      | 1.0E+00 |
| YDR130C | FIN1  | 19.9 (10) | 29.6 (10)      | 3.7E-02 | 0 (0)         | 0 (0)      | 0.0E+00 | 19.9 (10) | 29.6 (10)      | 3.7E-02 |
| YIL131C | FKH1  | 29.9 (20) | 24.8 (25)      | 1.1E-01 | 0 (0)         | 0 (0)      | 0.0E+00 | 29.9 (20) | 24.8 (25)      | 1.1E-01 |
| YAR050W | FLO1  | 21 (5)    | 28.8 (5)       | 4.1E-01 | 0 (0)         | 0 (0)      | 0.0E+00 | 21 (5)    | 28.8 (5)       | 4.1E-01 |
| YER182W | FMP10 | 23.2 (20) | 24.4 (20)      | 3.8E-01 | 0 (0)         | 0 (0)      | 0.0E+00 | 23.2 (20) | 24.4 (20)      | 3.8E-01 |
| YDR070C | FMP16 | 18.6 (10) | 29.6 (10)      | 7.2E-03 | 0 (0)         | 0 (0)      | 0.0E+00 | 18.6 (10) | 29.6 (10)      | 7.2E-03 |
| YKR065C | FMP18 | 18.8 (5)  | 29 (5)         | 3.1E-01 | 0 (0)         | 0 (0)      | 0.0E+00 | 18.8 (5)  | 29 (5)         | 3.1E-01 |
| YLR454W | FMP27 | 22.7 (20) | 26.9 (30)      | 1.1E-01 | 0 (0)         | 0 (0)      | 0.0E+00 | 22.7 (20) | 26.9 (30)      | 1.1E-01 |
| YDR493W | FMP36 | 22 (25)   | 25.4 (35)      | 7.6E-02 | 0 (0)         | 0 (0)      | 0.0E+00 | 22 (25)   | 25.4 (35)      | 7.6E-02 |
| YKR049C | FMP46 | 23.1 (20) | 28.4 (35)      | 1.5E-02 | 0 (0)         | 0 (0)      | 0.0E+00 | 23.1 (20) | 28.4 (35)      | 1.5E-02 |
| YBR262C | FMP51 | 17.3 (10) | 29.6 (10)      | 1.7E-03 | 0 (0)         | 0 (0)      | 0.0E+00 | 17.3 (10) | 29.6 (10)      | 1.7E-03 |
| YDR110W | FOB1  | 32 (1810) | 25.8<br>(1790) | 2.4E-56 | 31.8<br>(140) | 28.1 (100) | 2.1E-02 | 32 (1950) | 25.9<br>(1890) | 2.6E-57 |
| YLR449W | FPR4  | 28.6 (25) | 24.2 (25)      | 1.4E-01 | 0 (0)         | 0 (0)      | 0.0E+00 | 28.6 (25) | 24.2 (25)      | 1.4E-01 |
| YNR060W | FRE4  | 22.2 (5)  | 28.8 (5)       | 6.9E-01 | 0 (0)         | 0 (0)      | 0.0E+00 | 22.2 (5)  | 28.8 (5)       | 6.9E-01 |
| YCL058C | FYV5  | 21 (5)    | 28.8 (5)       | 6.9E-01 | 0 (0)         | 0 (0)      | 0.0E+00 | 21 (5)    | 28.8 (5)       | 6.9E-01 |
| YOR178C | GAC1  | 23.3 (10) | 29.3 (10)      | 1.5E-01 | 0 (0)         | 0 (0)      | 0.0E+00 | 23.3 (10) | 29.3 (10)      | 1.5E-01 |

|          |       |            |            |         |           |            |         |            |            |         |
|----------|-------|------------|------------|---------|-----------|------------|---------|------------|------------|---------|
| YFL021W  | GAT1  | 25.4 (25)  | 23.9 (45)  | 7.3E-01 | 0 (0)     | 0 (0)      | 0.0E+00 | 25.4 (25)  | 23.9 (45)  | 7.3E-01 |
| YDR283C  | GCN2  | 25.7 (495) | 27 (565)   | 2.8E-02 | 23.3      | 28.8 (220) | 1.1E-08 | 25.1 (675) | 27.5 (785) | 8.5E-07 |
|          |       |            |            |         | (180)     |            |         |            |            |         |
| YOR120W  | GCY1  | 26.5 (15)  | 25.1 (20)  | 3.3E-01 | 0 (0)     | 0 (0)      | 0.0E+00 | 26.5 (15)  | 25.1 (20)  | 3.3E-01 |
| YHR108W  | GGA2  | 26.6 (15)  | 25 (25)    | 4.9E-01 | 0 (0)     | 0 (0)      | 0.0E+00 | 26.6 (15)  | 25 (25)    | 4.9E-01 |
| YHR061C  | GIC1  | 24.4 (5)   | 22.4 (5)   | 7.3E-01 | 0 (0)     | 0 (0)      | 0.0E+00 | 24.4 (5)   | 22.4 (5)   | 7.3E-01 |
| YDR309C  | GIC2  | 24 (5)     | 29 (5)     | 5.5E-01 | 0 (0)     | 0 (0)      | 0.0E+00 | 24 (5)     | 29 (5)     | 5.5E-01 |
| YDR096W  | GIS1  | 31.2 (90)  | 25.2 (90)  | 2.5E-04 | 0 (0)     | 0 (0)      | 0.0E+00 | 31.2 (90)  | 25.2 (90)  | 2.5E-04 |
| YKR058W  | GLG1  | 25.8 (5)   | 29 (5)     | 8.3E-01 | 0 (0)     | 0 (0)      | 0.0E+00 | 25.8 (5)   | 29 (5)     | 8.3E-01 |
| YER040W  | GLN3  | 20.6 (45)  | 24.9 (45)  | 1.5E-02 | 0 (0)     | 0 (0)      | 0.0E+00 | 20.6 (45)  | 24.9 (45)  | 1.5E-02 |
| YDR272W  | GLO2  | 21.4 (5)   | 29 (5)     | 3.4E-01 | 0 (0)     | 0 (0)      | 0.0E+00 | 21.4 (5)   | 29 (5)     | 3.4E-01 |
| YHR183W  | GND1  | 24.2 (5)   | 22.4 (5)   | 8.4E-01 | 0 (0)     | 0 (0)      | 0.0E+00 | 24.2 (5)   | 22.4 (5)   | 8.4E-01 |
| YBR244W  | GPX2  | 19.5 (10)  | 29.6 (10)  | 2.3E-02 | 0 (0)     | 0 (0)      | 0.0E+00 | 19.5 (10)  | 29.6 (10)  | 2.3E-02 |
| YHR104W  | GRE3  | 18.6 (5)   | 22.4 (5)   | 6.0E-01 | 0 (0)     | 0 (0)      | 0.0E+00 | 18.6 (5)   | 22.4 (5)   | 6.0E-01 |
| YDR098C  | GRX3  | 27.1 (15)  | 28.5 (15)  | 1.5E-01 | 0 (0)     | 0 (0)      | 0.0E+00 | 27.1 (15)  | 28.5 (15)  | 1.5E-01 |
| YER174C  | GRX4  | 26.6 (10)  | 22.7 (10)  | 2.0E-01 | 0 (0)     | 0 (0)      | 0.0E+00 | 26.6 (10)  | 22.7 (10)  | 2.0E-01 |
| YDR108W  | GSG1  | 24.7 (15)  | 28.5 (15)  | 8.1E-02 | 0 (0)     | 0 (0)      | 0.0E+00 | 24.7 (15)  | 28.5 (15)  | 8.1E-02 |
| YDR295C  | HDA2  | 31.9 (20)  | 26.9 (35)  | 1.7E-01 | 0 (0)     | 0 (0)      | 0.0E+00 | 31.9 (20)  | 26.9 (35)  | 1.7E-01 |
| YBR248C  | HIS7  | 24.9 (10)  | 29.6 (10)  | 2.9E-01 | 0 (0)     | 0 (0)      | 0.0E+00 | 24.9 (10)  | 29.6 (10)  | 2.9E-01 |
| YLR450W  | HMG2  | 30 (25)    | 24.6 (25)  | 8.4E-02 | 0 (0)     | 0 (0)      | 0.0E+00 | 30 (25)    | 24.6 (25)  | 8.4E-02 |
| YDR305C  | HNT2  | 23 (5)     | 29 (5)     | 5.9E-01 | 0 (0)     | 0 (0)      | 0.0E+00 | 23 (5)     | 29 (5)     | 5.9E-01 |
| YDR258C  | HSP78 | 25.2 (10)  | 27.4 (10)  | 6.2E-01 | 0 (0)     | 0 (0)      | 0.0E+00 | 25.2 (10)  | 27.4 (10)  | 6.2E-01 |
| YNR032CA | HUB1  | 23.6 (5)   | 28.8 (5)   | 6.0E-01 | 0 (0)     | 0 (0)      | 0.0E+00 | 23.6 (5)   | 28.8 (5)   | 6.0E-01 |
| YHR094C  | HXT1  | 17.4 (5)   | 22.4 (5)   | 2.9E-01 | 0 (0)     | 0 (0)      | 0.0E+00 | 17.4 (5)   | 22.4 (5)   | 2.9E-01 |
| YHR092C  | HXT4  | 21.4 (5)   | 22.4 (5)   | 8.8E-01 | 0 (0)     | 0 (0)      | 0.0E+00 | 21.4 (5)   | 22.4 (5)   | 8.8E-01 |
| YOR126C  | IAH1  | 24.2 (5)   | 32.8 (5)   | 5.4E-01 | 0 (0)     | 0 (0)      | 0.0E+00 | 24.2 (5)   | 32.8 (5)   | 5.4E-01 |
| YOR136W  | IDH2  | 31.8 (200) | 26.1 (235) | 2.7E-09 | 30 (80)   | 25.7 (100) | 5.2E-03 | 31.3 (280) | 26 (335)   | 6.1E-11 |
| YLR384C  | IKI3  | 27.5 (10)  | 22.7 (10)  | 3.4E-01 | 0 (0)     | 0 (0)      | 0.0E+00 | 27.5 (10)  | 22.7 (10)  | 3.4E-01 |
| YLR432W  | IMD3  | 24.8 (20)  | 26.9 (30)  | 4.3E-01 | 0 (0)     | 0 (0)      | 0.0E+00 | 24.8 (20)  | 26.9 (30)  | 4.3E-01 |
| YHR046C  | INM1  | 36.1 (20)  | 23.2 (25)  | 8.1E-04 | 22.7 (40) | 25.3 (60)  | 3.2E-02 | 27.2 (60)  | 24.6 (85)  | 8.4E-01 |
| YDR123C  | INO2  | 29.3 (50)  | 26.8 (50)  | 3.1E-01 | 0 (0)     | 0 (0)      | 0.0E+00 | 29.3 (50)  | 26.8 (50)  | 3.1E-01 |

|         |       |            |            |         |            |            |         |            |            |         |
|---------|-------|------------|------------|---------|------------|------------|---------|------------|------------|---------|
| YIL002C | INP51 | 30.1 (150) | 26.6 (150) | 4.1E-03 | 33.6 (140) | 30.4 (140) | 2.6E-02 | 31.8 (290) | 28.4 (290) | 1.4E-04 |
| YOR109W | INP53 | 32 (45)    | 24.5 (45)  | 1.1E-03 | 32.8 (140) | 29.8 (180) | 5.1E-02 | 32.6 (185) | 28.7 (225) | 2.5E-03 |
| YDR315C | IPK1  | 36.6 (20)  | 25.9 (55)  | 1.4E-03 | 25.6 (40)  | 25.3 (60)  | 8.3E-01 | 29.3 (60)  | 25.6 (115) | 9.9E-02 |
| YDR072C | IPT1  | 20.6 (10)  | 29.6 (10)  | 2.5E-02 | 0 (0)      | 0 (0)      | 0.0E+00 | 20.6 (10)  | 29.6 (10)  | 2.5E-02 |
| YHR079C | IRE1  | 27 (145)   | 27.8 (145) | 6.2E-01 | 0 (0)      | 0 (0)      | 0.0E+00 | 27 (145)   | 27.8 (145) | 6.2E-01 |
| YER180C | ISC10 | 22.9 (15)  | 23.7 (15)  | 7.2E-01 | 0 (0)      | 0 (0)      | 0.0E+00 | 22.9 (15)  | 23.7 (15)  | 7.2E-01 |
| YBR245C | ISW1  | 18.8 (10)  | 29.6 (10)  | 2.1E-02 | 0 (0)      | 0 (0)      | 0.0E+00 | 18.8 (10)  | 29.6 (10)  | 2.1E-02 |
| YHR158C | KEL1  | 27.7 (30)  | 23.8 (65)  | 1.4E-01 | 23 (20)    | 23.7 (20)  | 6.5E-01 | 25.8 (50)  | 23.7 (85)  | 5.0E-01 |
| YDR122W | KIN1  | 24.4 (40)  | 25.9 (40)  | 7.0E-01 | 0 (0)      | 0 (0)      | 0.0E+00 | 24.4 (40)  | 25.9 (40)  | 7.0E-01 |
| YHR082C | KSP1  | 27.7 (15)  | 25 (25)    | 4.2E-01 | 0 (0)      | 0 (0)      | 0.0E+00 | 27.7 (15)  | 25 (25)    | 4.2E-01 |
| YOR099W | KTR1  | 23.5 (10)  | 29.3 (10)  | 2.7E-01 | 0 (0)      | 0 (0)      | 0.0E+00 | 23.5 (10)  | 29.3 (10)  | 2.7E-01 |
| YKR061W | KTR2  | 15.4 (5)   | 29 (5)     | 1.5E-01 | 0 (0)      | 0 (0)      | 0.0E+00 | 15.4 (5)   | 29 (5)     | 1.5E-01 |
| YIL085C | KTR7  | 26.6 (20)  | 24.4 (20)  | 5.0E-01 | 0 (0)      | 0 (0)      | 0.0E+00 | 26.6 (20)  | 24.4 (20)  | 5.0E-01 |
| YOR171C | LCB4  | 29.9 (20)  | 25.4 (65)  | 1.6E-01 | 0 (0)      | 0 (0)      | 0.0E+00 | 29.9 (20)  | 25.4 (65)  | 1.6E-01 |
| YOR123C | LEO1  | 26.7 (15)  | 27 (25)    | 6.3E-01 | 0 (0)      | 0 (0)      | 0.0E+00 | 26.7 (15)  | 27 (25)    | 6.3E-01 |
| YOR108W | LEU9  | 27.3 (15)  | 27 (25)    | 1.0E+00 | 0 (0)      | 0 (0)      | 0.0E+00 | 27.3 (15)  | 27 (25)    | 1.0E+00 |
| YHR156C | LIN1  | 34.5 (15)  | 25 (25)    | 2.4E-02 | 27.7 (40)  | 25.3 (60)  | 3.5E-01 | 29.6 (55)  | 25.2 (85)  | 2.6E-02 |
| YHR081W | LRP1  | 24.4 (5)   | 22.4 (5)   | 6.0E-01 | 0 (0)      | 0 (0)      | 0.0E+00 | 24.4 (5)   | 22.4 (5)   | 6.0E-01 |
| YOR142W | LSC1  | 23.9 (10)  | 29.3 (10)  | 2.9E-01 | 0 (0)      | 0 (0)      | 0.0E+00 | 23.9 (10)  | 29.3 (10)  | 2.9E-01 |
| YGR057C | LST7  | 18.4 (5)   | 32.8 (5)   | 8.7E-02 | 0 (0)      | 0 (0)      | 0.0E+00 | 18.4 (5)   | 32.8 (5)   | 8.7E-02 |
| YAL024C | LTE1  | 27.9 (15)  | 23.7 (15)  | 3.3E-01 | 0 (0)      | 0 (0)      | 0.0E+00 | 27.9 (15)  | 23.7 (15)  | 3.3E-01 |
| YIL094C | LYS12 | 29.5 (45)  | 25.1 (80)  | 1.7E-01 | 27.1 (80)  | 27.7 (120) | 4.9E-01 | 28 (125)   | 26.6 (200) | 4.7E-01 |
| YNR050C | LYS9  | 31.2 (20)  | 24.8 (50)  | 2.4E-02 | 27.3 (40)  | 25.3 (60)  | 8.4E-01 | 28.6 (60)  | 25 (110)   | 8.1E-02 |
| YLR427W | MAG2  | 23.8 (5)   | 28.8 (5)   | 8.6E-01 | 0 (0)      | 0 (0)      | 0.0E+00 | 23.8 (5)   | 28.8 (5)   | 8.6E-01 |
| YBR299W | MAL32 | 23.8 (10)  | 22.7 (10)  | 1.0E+00 | 0 (0)      | 0 (0)      | 0.0E+00 | 23.8 (10)  | 22.7 (10)  | 1.0E+00 |
| YDR318W | MCM21 | 28.8 (20)  | 26.9 (35)  | 6.9E-01 | 0 (0)      | 0 (0)      | 0.0E+00 | 28.8 (20)  | 26.9 (35)  | 6.9E-01 |
| YBR227C | MCX1  | 20 (10)    | 29.6 (10)  | 5.3E-02 | 0 (0)      | 0 (0)      | 0.0E+00 | 20 (10)    | 29.6 (10)  | 5.3E-02 |
| YLR368W | MDM30 | 28.7 (20)  | 23.8 (20)  | 2.0E-01 | 0 (0)      | 0 (0)      | 0.0E+00 | 28.7 (20)  | 23.8 (20)  | 2.0E-01 |
| YGR100W | MDR1  | 23.8 (5)   | 32.8 (5)   | 3.1E-01 | 0 (0)      | 0 (0)      | 0.0E+00 | 23.8 (5)   | 32.8 (5)   | 3.1E-01 |

|         |        |           |           |         |           |           |         |           |           |         |
|---------|--------|-----------|-----------|---------|-----------|-----------|---------|-----------|-----------|---------|
| YGR121C | MEP1   | 24.3 (10) | 29.3 (10) | 2.1E-01 | 0 (0)     | 0 (0)     | 0.0E+00 | 24.3 (10) | 29.3 (10) | 2.1E-01 |
| YDR253C | MET32  | 28.7 (15) | 29.1 (20) | 5.1E-01 | 0 (0)     | 0 (0)     | 0.0E+00 | 28.7 (15) | 29.1 (20) | 5.1E-01 |
| YDR461W | MFA1   | 23.3 (20) | 24.4 (20) | 6.5E-01 | 0 (0)     | 0 (0)     | 0.0E+00 | 23.3 (20) | 24.4 (20) | 6.5E-01 |
| YDR296W | MHR1   | 23 (5)    | 29 (5)    | 4.6E-01 | 0 (0)     | 0 (0)     | 0.0E+00 | 23 (5)    | 29 (5)    | 4.6E-01 |
| YHR015W | MIP6   | 20.8 (5)  | 22.4 (5)  | 8.4E-01 | 0 (0)     | 0 (0)     | 0.0E+00 | 20.8 (5)  | 22.4 (5)  | 8.4E-01 |
| YDR245W | MNN10  | 32.5 (20) | 25.9 (55) | 1.1E-01 | 31.3 (20) | 27.7 (40) | 1.3E-01 | 31.9 (40) | 26.7 (95) | 2.2E-02 |
| YNR059W | MNT4   | 23.8 (5)  | 28.8 (5)  | 8.0E-01 | 0 (0)     | 0 (0)     | 0.0E+00 | 23.8 (5)  | 28.8 (5)  | 8.0E-01 |
| YOR177C | MPC54  | 32.7 (25) | 28.4 (25) | 1.6E-01 | 0 (0)     | 0 (0)     | 0.0E+00 | 32.7 (25) | 28.4 (25) | 1.6E-01 |
| YGR084C | MRP13  | 24.6 (5)  | 32.8 (5)  | 4.0E-01 | 0 (0)     | 0 (0)     | 0.0E+00 | 24.6 (5)  | 32.8 (5)  | 4.0E-01 |
| YDR116C | MRPL1  | 23.5 (10) | 29.6 (10) | 6.9E-02 | 0 (0)     | 0 (0)     | 0.0E+00 | 23.5 (10) | 29.6 (10) | 6.9E-02 |
| YDR322W | MRPL35 | 22.4 (5)  | 29 (5)    | 4.1E-01 | 0 (0)     | 0 (0)     | 0.0E+00 | 22.4 (5)  | 29 (5)    | 4.1E-01 |
| YML009C | MRPL39 | 21.4 (20) | 26.9 (30) | 3.2E-02 | 0 (0)     | 0 (0)     | 0.0E+00 | 21.4 (20) | 26.9 (30) | 3.2E-02 |
| YDR337W | MRPS28 | 34.3 (15) | 29.4 (15) | 3.3E-01 | 0 (0)     | 0 (0)     | 0.0E+00 | 34.3 (15) | 29.4 (15) | 3.3E-01 |
| YKR052C | MRS4   | 19.1 (20) | 27.2 (25) | 3.3E-03 | 0 (0)     | 0 (0)     | 0.0E+00 | 19.1 (20) | 27.2 (25) | 3.3E-03 |
| YHR039C | MSC7   | 18.6 (5)  | 22.4 (5)  | 4.5E-01 | 0 (0)     | 0 (0)     | 0.0E+00 | 18.6 (5)  | 22.4 (5)  | 4.5E-01 |
| YDR097C | MSH6   | 30.7 (20) | 26.2 (30) | 1.2E-01 | 0 (0)     | 0 (0)     | 0.0E+00 | 30.7 (20) | 26.2 (30) | 1.2E-01 |
| YDR335W | MSN5   | 29.1 (15) | 29.4 (15) | 8.2E-01 | 0 (0)     | 0 (0)     | 0.0E+00 | 29.1 (15) | 29.4 (15) | 8.2E-01 |
| YDR268W | MSW1   | 35 (35)   | 26.9 (35) | 2.8E-03 | 30.2 (20) | 21.3 (20) | 1.2E-02 | 33.2 (55) | 24.8 (55) | 1.1E-04 |
| YDR277C | MTH1   | 28.9 (30) | 28.4 (35) | 8.9E-01 | 0 (0)     | 0 (0)     | 0.0E+00 | 28.9 (30) | 28.4 (35) | 8.9E-01 |
| YGR055W | MUP1   | 24.3 (15) | 27 (25)   | 3.6E-01 | 0 (0)     | 0 (0)     | 0.0E+00 | 24.3 (15) | 27 (25)   | 3.6E-01 |
| YHR086W | NAM8   | 24.9 (25) | 22.5 (45) | 3.4E-01 | 0 (0)     | 0 (0)     | 0.0E+00 | 24.9 (25) | 22.5 (45) | 3.4E-01 |
| YKR048C | NAP1   | 24.6 (45) | 27.2 (45) | 6.3E-02 | 0 (0)     | 0 (0)     | 0.0E+00 | 24.6 (45) | 27.2 (45) | 6.3E-02 |
| YHR124W | NDT80  | 24.2 (5)  | 22.4 (5)  | 6.6E-01 | 0 (0)     | 0 (0)     | 0.0E+00 | 24.2 (5)  | 22.4 (5)  | 6.6E-01 |
| YOR156C | NFI1   | 23.1 (10) | 29.3 (10) | 2.6E-01 | 0 (0)     | 0 (0)     | 0.0E+00 | 23.1 (10) | 29.3 (10) | 2.6E-01 |
| YKR103W | NFT1   | 26.1 (20) | 26.1 (25) | 9.5E-01 | 0 (0)     | 0 (0)     | 0.0E+00 | 26.1 (20) | 26.1 (25) | 9.5E-01 |
| YKR104W | NFT1   | 22.4 (5)  | 28.8 (5)  | 6.0E-01 | 0 (0)     | 0 (0)     | 0.0E+00 | 22.4 (5)  | 28.8 (5)  | 6.0E-01 |
| YLR351C | NIT3   | 27.8 (20) | 24.4 (20) | 2.5E-01 | 0 (0)     | 0 (0)     | 0.0E+00 | 27.8 (20) | 24.4 (20) | 2.5E-01 |
| YHR077C | NMD2   | 24 (5)    | 22.4 (5)  | 1.0E+00 | 0 (0)     | 0 (0)     | 0.0E+00 | 24 (5)    | 22.4 (5)  | 1.0E+00 |
| YLR363C | NMD4   | 29.5 (25) | 24 (55)   | 3.3E-02 | 16.9 (40) | 21.1 (20) | 2.5E-02 | 21.8 (65) | 23.2 (75) | 1.1E-01 |
| YHR133C | NSG1   | 24.6 (5)  | 22.4 (5)  | 7.5E-01 | 0 (0)     | 0 (0)     | 0.0E+00 | 24.6 (5)  | 22.4 (5)  | 7.5E-01 |
| YIL136W | OM45   | 31.2 (35) | 25.4 (35) | 1.3E-01 | 19.2 (40) | 21.1 (20) | 3.7E-01 | 24.8 (75) | 23.8 (55) | 9.1E-01 |

|         |        |           |           |         |            |            |         |            |            |         |
|---------|--------|-----------|-----------|---------|------------|------------|---------|------------|------------|---------|
| YLR350W | ORM2   | 22.6 (10) | 22.7 (10) | 7.0E-01 | 0 (0)      | 0 (0)      | 0.0E+00 | 22.6 (10)  | 22.7 (10)  | 7.0E-01 |
| YOR130C | ORT1   | 27.8 (25) | 28.4 (25) | 3.8E-01 | 0 (0)      | 0 (0)      | 0.0E+00 | 27.8 (25)  | 28.4 (25)  | 3.8E-01 |
| YHR073W | OSH3   | 24.3 (15) | 25 (25)   | 4.3E-01 | 0 (0)      | 0 (0)      | 0.0E+00 | 24.3 (15)  | 25 (25)    | 4.3E-01 |
| YHR179W | OYE2   | 18.2 (5)  | 22.4 (5)  | 4.5E-01 | 0 (0)      | 0 (0)      | 0.0E+00 | 18.2 (5)   | 22.4 (5)   | 4.5E-01 |
| YGR078C | PAC10  | 21.3 (35) | 26.2 (45) | 3.8E-02 | 0 (0)      | 0 (0)      | 0.0E+00 | 21.3 (35)  | 26.2 (45)  | 3.8E-02 |
| YMR174C | PAI3   | 28.3 (25) | 27.5 (35) | 9.9E-01 | 0 (0)      | 0 (0)      | 0.0E+00 | 28.3 (25)  | 27.5 (35)  | 9.9E-01 |
| YDR251W | PAM1   | 29.9 (20) | 26.9 (35) | 2.2E-01 | 0 (0)      | 0 (0)      | 0.0E+00 | 29.9 (20)  | 26.9 (35)  | 2.2E-01 |
| YLR461W | PAU4   | 32.1 (20) | 26.9 (30) | 8.3E-02 | 0 (0)      | 0 (0)      | 0.0E+00 | 32.1 (20)  | 26.9 (30)  | 8.3E-02 |
| YBR233W | PBP2   | 24 (10)   | 29.6 (10) | 1.2E-01 | 0 (0)      | 0 (0)      | 0.0E+00 | 24 (10)    | 29.6 (10)  | 1.2E-01 |
| YKR097W | PCK1   | 20.2 (5)  | 28.8 (5)  | 2.6E-01 | 0 (0)      | 0 (0)      | 0.0E+00 | 20.2 (5)   | 28.8 (5)   | 2.6E-01 |
| YGR101W | PCP1   | 16.8 (5)  | 32.8 (5)  | 9.5E-02 | 0 (0)      | 0 (0)      | 0.0E+00 | 16.8 (5)   | 32.8 (5)   | 9.5E-02 |
| YER178W | PDA1   | 18.7 (40) | 23.2 (70) | 5.3E-03 | 0 (0)      | 0 (0)      | 0.0E+00 | 18.7 (40)  | 23.2 (70)  | 5.3E-03 |
| YGR087C | PDC6   | 24.5 (25) | 24.2 (45) | 7.6E-01 | 0 (0)      | 0 (0)      | 0.0E+00 | 24.5 (25)  | 24.2 (45)  | 7.6E-01 |
| YOR153W | PDR5   | 23.1 (10) | 29.3 (10) | 2.1E-01 | 0 (0)      | 0 (0)      | 0.0E+00 | 23.1 (10)  | 29.3 (10)  | 2.1E-01 |
| YDR323C | PEP7   | 24.5 (10) | 27.4 (10) | 6.2E-01 | 0 (0)      | 0 (0)      | 0.0E+00 | 24.5 (10)  | 27.4 (10)  | 6.2E-01 |
| YDR079W | PET100 | 25.2 (10) | 29.6 (10) | 3.1E-01 | 0 (0)      | 0 (0)      | 0.0E+00 | 25.2 (10)  | 29.6 (10)  | 3.1E-01 |
| YJR034W | PET191 | 23 (15)   | 23.7 (15) | 5.5E-01 | 0 (0)      | 0 (0)      | 0.0E+00 | 23 (15)    | 23.7 (15)  | 5.5E-01 |
| YDR265W | PEX10  | 26.8 (25) | 28.1 (25) | 7.2E-01 | 0 (0)      | 0 (0)      | 0.0E+00 | 26.8 (25)  | 28.1 (25)  | 7.2E-01 |
| YHR160C | PEX18  | 22.6 (5)  | 22.4 (5)  | 7.9E-01 | 0 (0)      | 0 (0)      | 0.0E+00 | 22.6 (5)   | 22.4 (5)   | 7.9E-01 |
| YDR329C | PEX3   | 22.8 (5)  | 29 (5)    | 3.4E-01 | 0 (0)      | 0 (0)      | 0.0E+00 | 22.8 (5)   | 29 (5)     | 3.4E-01 |
| YDR244W | PEX5   | 27.3 (20) | 26.9 (35) | 8.7E-01 | 25.7 (20)  | 28.7 (20)  | 4.0E-01 | 26.5 (40)  | 27.5 (55)  | 6.5E-01 |
| YGR077C | PEX8   | 19.6 (5)  | 32.8 (5)  | 1.7E-01 | 0 (0)      | 0 (0)      | 0.0E+00 | 19.6 (5)   | 32.8 (5)   | 1.7E-01 |
| YDR281C | PHM6   | 29.7 (20) | 26.9 (35) | 3.0E-01 | 0 (0)      | 0 (0)      | 0.0E+00 | 29.7 (20)  | 26.9 (35)  | 3.0E-01 |
| YDR313C | PIB1   | 34.9 (55) | 27.9 (55) | 5.3E-04 | 28.4 (100) | 26.8 (120) | 3.4E-01 | 30.7 (155) | 27.2 (175) | 3.0E-03 |
| YHR034W | PIH1   | 19.2 (5)  | 22.4 (5)  | 4.0E-01 | 0 (0)      | 0 (0)      | 0.0E+00 | 19.2 (5)   | 22.4 (5)   | 4.0E-01 |
| YOR104W | PIN2   | 23.6 (5)  | 32.8 (5)  | 4.2E-01 | 0 (0)      | 0 (0)      | 0.0E+00 | 23.6 (5)   | 32.8 (5)   | 4.2E-01 |
| YDR276C | PMP3   | 28.6 (15) | 29.1 (20) | 9.9E-01 | 0 (0)      | 0 (0)      | 0.0E+00 | 28.6 (15)  | 29.1 (20)  | 9.9E-01 |
| YIL122W | POG1   | 21.1 (15) | 23.7 (15) | 2.7E-01 | 0 (0)      | 0 (0)      | 0.0E+00 | 21.1 (15)  | 23.7 (15)  | 2.7E-01 |
| YHR075C | PPE1   | 25.7 (15) | 25 (25)   | 6.8E-01 | 0 (0)      | 0 (0)      | 0.0E+00 | 25.7 (15)  | 25 (25)    | 6.8E-01 |
| YDR075W | PPH3   | 23.8 (10) | 29.6 (10) | 4.4E-02 | 0 (0)      | 0 (0)      | 0.0E+00 | 23.8 (10)  | 29.6 (10)  | 4.4E-02 |



|         |        |            |           |         |            |            |         |            |            |         |
|---------|--------|------------|-----------|---------|------------|------------|---------|------------|------------|---------|
| YDR300C | PRO1   | 28.8 (20)  | 26.9 (35) | 9.5E-01 | 0 (0)      | 0 (0)      | 0.0E+00 | 28.8 (20)  | 26.9 (35)  | 9.5E-01 |
| YDR055W | PST1   | 25.3 (15)  | 28.5 (15) | 2.0E-01 | 0 (0)      | 0 (0)      | 0.0E+00 | 25.3 (15)  | 28.5 (15)  | 2.0E-01 |
| YLR376C | PSY3   | 23.6 (15)  | 23.7 (15) | 9.5E-01 | 0 (0)      | 0 (0)      | 0.0E+00 | 23.6 (15)  | 23.7 (15)  | 9.5E-01 |
| YER089C | PTC2   | 21.8 (15)  | 23.7 (15) | 3.2E-01 | 0 (0)      | 0 (0)      | 0.0E+00 | 21.8 (15)  | 23.7 (15)  | 3.2E-01 |
| YHR076W | PTC7   | 24 (5)     | 22.4 (5)  | 9.4E-01 | 0 (0)      | 0 (0)      | 0.0E+00 | 24 (5)     | 22.4 (5)   | 9.4E-01 |
| YKR093W | PTR2   | 26.8 (20)  | 26.1 (25) | 5.8E-01 | 26.2 (20)  | 30.9 (20)  | 9.3E-02 | 26.5 (40)  | 28.2 (45)  | 4.3E-01 |
| YHR037W | PUT2   | 22 (5)     | 22.4 (5)  | 1.0E+00 | 0 (0)      | 0 (0)      | 0.0E+00 | 22 (5)     | 22.4 (5)   | 1.0E+00 |
| YKR090W | PXL1   | 23.2 (5)   | 28.8 (5)  | 1.0E+00 | 0 (0)      | 0 (0)      | 0.0E+00 | 23.2 (5)   | 28.8 (5)   | 1.0E+00 |
| YER173W | RAD24  | 20 (10)    | 22.7 (10) | 4.3E-01 | 0 (0)      | 0 (0)      | 0.0E+00 | 20 (10)    | 22.7 (10)  | 4.3E-01 |
| YDR076W | RAD55  | 12 (10)    | 29.6 (10) | 6.6E-04 | 0 (0)      | 0 (0)      | 0.0E+00 | 12 (10)    | 29.6 (10)  | 6.6E-04 |
| YOR101W | RAS1   | 30.6 (60)  | 26.7 (75) | 3.8E-02 | 21.5 (40)  | 23.8 (40)  | 4.2E-01 | 26.9 (100) | 25.7 (115) | 4.3E-01 |
| YHR157W | REC104 | 26.9 (15)  | 25 (25)   | 7.6E-01 | 0 (0)      | 0 (0)      | 0.0E+00 | 26.9 (15)  | 25 (25)    | 7.6E-01 |
| YBR260C | RGD1   | 24.6 (10)  | 29.6 (10) | 1.6E-01 | 0 (0)      | 0 (0)      | 0.0E+00 | 24.6 (10)  | 29.6 (10)  | 1.6E-01 |
| YOR107W | RGS2   | 34.2 (25)  | 25.3 (25) | 2.3E-03 | 23.1 (40)  | 25.3 (60)  | 1.3E-01 | 27.3 (65)  | 25.3 (85)  | 5.1E-01 |
| YLR453C | RIF2   | 23.7 (20)  | 26.9 (30) | 2.7E-01 | 0 (0)      | 0 (0)      | 0.0E+00 | 23.7 (20)  | 26.9 (30)  | 2.7E-01 |
| YDR255C | RMD5   | 27.5 (15)  | 27.1 (15) | 7.7E-01 | 0 (0)      | 0 (0)      | 0.0E+00 | 27.5 (15)  | 27.1 (15)  | 7.7E-01 |
| YDR257C | RMS1   | 27.5 (45)  | 26.4 (45) | 8.3E-01 | 0 (0)      | 0 (0)      | 0.0E+00 | 27.5 (45)  | 26.4 (45)  | 8.3E-01 |
| YDR279W | RNH202 | 25.1 (15)  | 29.1 (20) | 9.5E-02 | 0 (0)      | 0 (0)      | 0.0E+00 | 25.1 (15)  | 29.1 (20)  | 9.5E-02 |
| YGR070W | ROM1   | 24.9 (20)  | 25.9 (65) | 4.8E-01 | 0 (0)      | 0 (0)      | 0.0E+00 | 24.9 (20)  | 25.9 (65)  | 4.8E-01 |
| YLR371W | ROM2   | 38 (50)    | 25.5 (50) | 1.8E-08 | 29.3 (40)  | 25.3 (60)  | 4.7E-02 | 34.2 (90)  | 25.4 (110) | 1.0E-08 |
| YBR229C | ROT2   | 23.1 (10)  | 29.6 (10) | 1.4E-01 | 0 (0)      | 0 (0)      | 0.0E+00 | 23.1 (10)  | 29.6 (10)  | 1.4E-01 |
| YGR085C | RPL11B | 27.6 (25)  | 25 (45)   | 6.1E-01 | 0 (0)      | 0 (0)      | 0.0E+00 | 27.6 (25)  | 25 (45)    | 6.1E-01 |
| YLR344W | RPL26A | 26.8 (40)  | 24.3 (65) | 2.8E-01 | 0 (0)      | 0 (0)      | 0.0E+00 | 26.8 (40)  | 24.3 (65)  | 2.8E-01 |
| YDL075W | RPL31A | 34.8 (455) | 26 (375)  | 6.0E-21 | 37.6 (120) | 25.7 (180) | 5.0E-17 | 35.4 (575) | 25.9 (555) | 1.8E-34 |
| YDR500C | RPL37B | 31.5 (40)  | 23.3 (55) | 1.2E-04 | 29.7 (80)  | 24.4 (80)  | 3.8E-03 | 30.3 (120) | 23.9 (135) | 6.9E-06 |
| YLR448W | RPL6B  | 29.6 (130) | 26 (170)  | 2.9E-03 | 33.5 (40)  | 25.3 (60)  | 1.1E-04 | 30.5 (170) | 25.8 (230) | 9.8E-06 |
| YLR441C | RPS1A  | 29.9 (50)  | 27 (70)   | 3.7E-01 | 26 (40)    | 25.3 (60)  | 6.0E-01 | 28.1 (90)  | 26.2 (130) | 7.1E-01 |
| YKR057W | RPS21A | 28.5 (40)  | 26.4 (95) | 5.9E-01 | 27.4 (60)  | 26.4 (80)  | 9.9E-01 | 27.9 (100) | 26.4 (175) | 7.6E-01 |
| YLR367W | RPS22B | 26.4 (35)  | 25 (75)   | 8.3E-01 | 23.3 (40)  | 25.3 (60)  | 9.0E-02 | 24.7 (75)  | 25.1 (135) | 2.9E-01 |
| YGR118W | RPS23A | 26.8 (45)  | 26.4 (65) | 3.4E-01 | 0 (0)      | 0 (0)      | 0.0E+00 | 26.8 (45)  | 26.4 (65)  | 3.4E-01 |

|         |        |           |           |         |           |           |         |            |            |         |
|---------|--------|-----------|-----------|---------|-----------|-----------|---------|------------|------------|---------|
| YHR021C | RPS27B | 21.2 (35) | 27 (45)   | 4.2E-03 | 0 (0)     | 0 (0)     | 0.0E+00 | 21.2 (35)  | 27 (45)    | 4.2E-03 |
| YOR167C | RPS28A | 26.7 (35) | 26.4 (45) | 6.8E-01 | 0 (0)     | 0 (0)     | 0.0E+00 | 26.7 (35)  | 26.4 (45)  | 6.8E-01 |
| YLR388W | RPS29A | 24.1 (40) | 24.9 (70) | 8.4E-01 | 19.7 (20) | 24.2 (20) | 9.0E-02 | 22.6 (60)  | 24.7 (90)  | 1.7E-01 |
| YOR182C | RPS30B | 24.3 (15) | 28.8 (25) | 1.7E-01 | 0 (0)     | 0 (0)     | 0.0E+00 | 24.3 (15)  | 28.8 (25)  | 1.7E-01 |
| YHR038W | RRF1   | 23.8 (5)  | 22.4 (5)  | 6.4E-01 | 0 (0)     | 0 (0)     | 0.0E+00 | 23.8 (5)   | 22.4 (5)   | 6.4E-01 |
| YHR031C | RRM3   | 18.2 (25) | 25.7 (45) | 3.9E-04 | 22.8 (20) | 30.7 (40) | 4.7E-02 | 20.2 (45)  | 28 (85)    | 1.6E-04 |
| YDR083W | RRP8   | 29.5 (40) | 27.4 (50) | 5.8E-01 | 22.6 (40) | 21.1 (20) | 5.9E-01 | 26 (80)    | 25.6 (70)  | 9.6E-01 |
| YGR056W | RSC1   | 28 (25)   | 25.3 (25) | 4.5E-01 | 0 (0)     | 0 (0)     | 0.0E+00 | 28 (25)    | 25.3 (25)  | 4.5E-01 |
| YLR357W | RSC2   | 20.4 (10) | 22.7 (10) | 5.4E-01 | 0 (0)     | 0 (0)     | 0.0E+00 | 20.4 (10)  | 22.7 (10)  | 5.4E-01 |
| YDR289C | RTT103 | 24.3 (15) | 29.1 (20) | 9.5E-02 | 0 (0)     | 0 (0)     | 0.0E+00 | 24.3 (15)  | 29.1 (20)  | 9.5E-02 |
| YHR154W | RTT107 | 18.3 (15) | 25 (25)   | 4.2E-02 | 0 (0)     | 0 (0)     | 0.0E+00 | 18.3 (15)  | 25 (25)    | 4.2E-02 |
| YOR138C | RUP1   | 21.8 (5)  | 32.8 (5)  | 3.1E-01 | 0 (0)     | 0 (0)     | 0.0E+00 | 21.8 (5)   | 32.8 (5)   | 3.1E-01 |
| YDR129C | SAC6   | 14.7 (30) | 25.8 (60) | 2.4E-05 | 0 (0)     | 0 (0)     | 0.0E+00 | 14.7 (30)  | 25.8 (60)  | 2.4E-05 |
| YDR502C | SAM2   | 26.3 (35) | 24.5 (35) | 5.4E-01 | 0 (0)     | 0 (0)     | 0.0E+00 | 26.3 (35)  | 24.5 (35)  | 5.4E-01 |
| YHR103W | SBE22  | 24.4 (15) | 25 (25)   | 7.9E-01 | 0 (0)     | 0 (0)     | 0.0E+00 | 24.4 (15)  | 25 (25)    | 7.9E-01 |
| YOR165W | SEY1   | 16.6 (5)  | 32.8 (5)  | 1.1E-01 | 0 (0)     | 0 (0)     | 0.0E+00 | 16.6 (5)   | 32.8 (5)   | 1.1E-01 |
| YOR140W | SFL1   | 23.9 (25) | 28.4 (25) | 8.5E-02 | 0 (0)     | 0 (0)     | 0.0E+00 | 23.9 (25)  | 28.4 (25)  | 8.5E-02 |
| YBR258C | SHG1   | 22.5 (10) | 29.6 (10) | 3.4E-02 | 0 (0)     | 0 (0)     | 0.0E+00 | 22.5 (10)  | 29.6 (10)  | 3.4E-02 |
| YBR263W | SHM1   | 28.5 (15) | 28.5 (15) | 6.9E-01 | 0 (0)     | 0 (0)     | 0.0E+00 | 28.5 (15)  | 28.5 (15)  | 6.9E-01 |
| YDR078C | SHU2   | 24.8 (10) | 29.6 (10) | 3.3E-01 | 0 (0)     | 0 (0)     | 0.0E+00 | 24.8 (10)  | 29.6 (10)  | 3.3E-01 |
| YGR112W | SHY1   | 14.8 (5)  | 32.8 (5)  | 5.6E-02 | 0 (0)     | 0 (0)     | 0.0E+00 | 14.8 (5)   | 32.8 (5)   | 5.6E-02 |
| YOR137C | SIA1   | 29.8 (25) | 28.4 (25) | 9.6E-01 | 0 (0)     | 0 (0)     | 0.0E+00 | 29.8 (25)  | 28.4 (25)  | 9.6E-01 |
| YMR175W | SIP18  | 18.6 (20) | 28.2 (30) | 5.6E-04 | 0 (0)     | 0 (0)     | 0.0E+00 | 18.6 (20)  | 28.2 (30)  | 5.6E-04 |
| YKR101W | SIR1   | 19.4 (5)  | 28.8 (5)  | 4.6E-01 | 0 (0)     | 0 (0)     | 0.0E+00 | 19.4 (5)   | 28.8 (5)   | 4.6E-01 |
| YDL047W | SIT4   | 25.9 (80) | 28.3 (85) | 2.3E-01 | 0 (0)     | 0 (0)     | 0.0E+00 | 25.9 (80)  | 28.3 (85)  | 2.3E-01 |
| YDR515W | SLF1   | 25.5 (20) | 24.4 (20) | 9.4E-01 | 0 (0)     | 0 (0)     | 0.0E+00 | 25.5 (20)  | 24.4 (20)  | 9.4E-01 |
| YHR030C | SLT2   | 24.2 (45) | 27 (45)   | 8.6E-02 | 0 (0)     | 0 (0)     | 0.0E+00 | 24.2 (45)  | 27 (45)    | 8.6E-02 |
| YBR228W | SLX1   | 25.9 (35) | 24.1 (40) | 5.1E-01 | 0 (0)     | 0 (0)     | 0.0E+00 | 25.9 (35)  | 24.1 (40)  | 5.1E-01 |
| YGR081C | SLX9   | 22.2 (10) | 29.3 (10) | 1.8E-01 | 0 (0)     | 0 (0)     | 0.0E+00 | 22.2 (10)  | 29.3 (10)  | 1.8E-01 |
| YHR050W | SMF2   | 23.9 (25) | 26.3 (25) | 1.1E-01 | 0 (0)     | 0 (0)     | 0.0E+00 | 23.9 (25)  | 26.3 (25)  | 1.1E-01 |
| YDR477W | SNF1   | 38.8 (40) | 25.5 (40) | 2.4E-06 | 26.1      | 27 (120)  | 3.5E-01 | 29.8 (140) | 26.6 (160) | 4.9E-02 |

|         |        |            |            |         |           |           |         |         |            |            |         |
|---------|--------|------------|------------|---------|-----------|-----------|---------|---------|------------|------------|---------|
| YDR073W | SNF11  | 30.5 (30)  | 28.4 (30)  | 6.9E-01 | (100)     | 0 (0)     | 0 (0)   | 0.0E+00 | 30.5 (30)  | 28.4 (30)  | 6.9E-01 |
| YHR163W | SOL3   | 28.9 (15)  | 25 (25)    | 7.5E-01 | 0 (0)     | 0 (0)     | 0.0E+00 | 0.0E+00 | 28.9 (15)  | 25 (25)    | 7.5E-01 |
| YAL047C | SPC72  | 4 (5)      | 28.8 (5)   | 7.9E-03 | 0 (0)     | 0 (0)     | 0.0E+00 | 0.0E+00 | 4 (5)      | 28.8 (5)   | 7.9E-03 |
| YHR136C | SPL2   | 15.6 (5)   | 22.4 (5)   | 1.3E-01 | 0 (0)     | 0 (0)     | 0.0E+00 | 0.0E+00 | 15.6 (5)   | 22.4 (5)   | 1.3E-01 |
| YHR152W | SPO12  | 24.2 (5)   | 22.4 (5)   | 1.0E+00 | 0 (0)     | 0 (0)     | 0.0E+00 | 0.0E+00 | 24.2 (5)   | 22.4 (5)   | 1.0E+00 |
| YHR014W | SPO13  | 28.3 (35)  | 26.5 (45)  | 4.1E-01 | 0 (0)     | 0 (0)     | 0.0E+00 | 0.0E+00 | 28.3 (35)  | 26.5 (45)  | 4.1E-01 |
| YHR153C | SPO16  | 17 (5)     | 22.4 (5)   | 3.1E-01 | 0 (0)     | 0 (0)     | 0.0E+00 | 0.0E+00 | 17 (5)     | 22.4 (5)   | 3.1E-01 |
| YDR104C | SPO71  | 27.3 (15)  | 30.1 (20)  | 3.9E-01 | 0 (0)     | 0 (0)     | 0.0E+00 | 0.0E+00 | 27.3 (15)  | 30.1 (20)  | 3.9E-01 |
| YGR059W | SPR3   | 28.8 (25)  | 25.3 (25)  | 2.4E-01 | 0 (0)     | 0 (0)     | 0.0E+00 | 0.0E+00 | 28.8 (25)  | 25.3 (25)  | 2.4E-01 |
| YHR139C | SPS100 | 27.5 (15)  | 25 (25)    | 9.6E-01 | 0 (0)     | 0 (0)     | 0.0E+00 | 0.0E+00 | 27.5 (15)  | 25 (25)    | 9.6E-01 |
| YGR104C | SRB5   | 22.2 (5)   | 32.8 (5)   | 2.1E-01 | 0 (0)     | 0 (0)     | 0.0E+00 | 0.0E+00 | 22.2 (5)   | 32.8 (5)   | 2.1E-01 |
| YKR091W | SRL3   | 18.4 (5)   | 28.8 (5)   | 2.5E-01 | 0 (0)     | 0 (0)     | 0.0E+00 | 0.0E+00 | 18.4 (5)   | 28.8 (5)   | 2.5E-01 |
| YKR092C | SRP40  | 22.6 (25)  | 24.2 (25)  | 6.1E-01 | 0 (0)     | 0 (0)     | 0.0E+00 | 0.0E+00 | 22.6 (25)  | 24.2 (25)  | 6.1E-01 |
| YDR293C | SSD1   | 26.7 (105) | 27.5 (105) | 4.9E-01 | 0 (0)     | 0 (0)     | 0.0E+00 | 0.0E+00 | 26.7 (105) | 27.5 (105) | 4.9E-01 |
| YHR066W | SSF1   | 38.5 (20)  | 24.6 (65)  | 2.1E-03 | 27.4 (40) | 25.3 (60) | 3.3E-01 | 3.3E-01 | 31.1 (60)  | 24.9 (125) | 6.1E-03 |
| YDR312W | SSF2   | 22.3 (10)  | 27.4 (10)  | 4.7E-01 | 0 (0)     | 0 (0)     | 0.0E+00 | 0.0E+00 | 22.3 (10)  | 27.4 (10)  | 4.7E-01 |
| YLR452C | SST2   | 31 (25)    | 25.7 (25)  | 6.8E-02 | 22.7 (40) | 21.1 (20) | 3.9E-01 | 3.9E-01 | 25.9 (65)  | 23.6 (45)  | 3.0E-01 |
| YMR053C | STB2   | 29 (40)    | 24.4 (40)  | 3.1E-01 | 20.6 (60) | 21.2 (40) | 5.2E-01 | 5.2E-01 | 24 (100)   | 22.8 (80)  | 8.8E-01 |
| YHR178W | STB5   | 20.2 (5)   | 22.4 (5)   | 4.0E-01 | 0 (0)     | 0 (0)     | 0.0E+00 | 0.0E+00 | 20.2 (5)   | 22.4 (5)   | 4.0E-01 |
| YLR362W | STE11  | 22.7 (45)  | 24.9 (50)  | 1.6E-01 | 23.1 (20) | 30.9 (20) | 6.8E-03 | 6.8E-03 | 22.8 (65)  | 26.6 (70)  | 1.2E-02 |
| YLR389C | STE23  | 24.2 (15)  | 23.7 (15)  | 9.5E-01 | 0 (0)     | 0 (0)     | 0.0E+00 | 0.0E+00 | 24.2 (15)  | 23.7 (15)  | 9.5E-01 |
| YLR375W | STP3   | 24.8 (25)  | 25.4 (35)  | 2.4E-01 | 0 (0)     | 0 (0)     | 0.0E+00 | 0.0E+00 | 24.8 (25)  | 25.4 (35)  | 2.4E-01 |
| YMR054W | STV1   | 24.1 (25)  | 25.7 (40)  | 4.6E-01 | 0 (0)     | 0 (0)     | 0.0E+00 | 0.0E+00 | 24.1 (25)  | 25.7 (40)  | 4.6E-01 |
| YDR310C | SUM1   | 23.7 (10)  | 27.4 (10)  | 4.5E-01 | 0 (0)     | 0 (0)     | 0.0E+00 | 0.0E+00 | 23.7 (10)  | 27.4 (10)  | 4.5E-01 |
| YDR297W | SUR2   | 29.8 (25)  | 25.9 (25)  | 6.8E-02 | 0 (0)     | 0 (0)     | 0.0E+00 | 0.0E+00 | 29.8 (25)  | 25.9 (25)  | 6.8E-02 |
| YLR372W | SUR4   | 27.6 (35)  | 24.5 (35)  | 3.6E-01 | 0 (0)     | 0 (0)     | 0.0E+00 | 0.0E+00 | 27.6 (35)  | 24.5 (35)  | 3.6E-01 |
| YDR320C | SWA2   | 26.2 (15)  | 29.1 (20)  | 2.9E-01 | 0 (0)     | 0 (0)     | 0.0E+00 | 0.0E+00 | 26.2 (15)  | 29.1 (20)  | 2.9E-01 |
| YDR126W | SWF1   | 19.7 (20)  | 27.8 (30)  | 2.0E-03 | 0 (0)     | 0 (0)     | 0.0E+00 | 0.0E+00 | 19.7 (20)  | 27.8 (30)  | 2.0E-03 |
| YDR260C | SWM1   | 31.1 (20)  | 26.9 (35)  | 1.9E-01 | 0 (0)     | 0 (0)     | 0.0E+00 | 0.0E+00 | 31.1 (20)  | 26.9 (35)  | 1.9E-01 |
| YOR179C | SYC1   | 28.3 (25)  | 28.4 (25)  | 8.6E-01 | 0 (0)     | 0 (0)     | 0.0E+00 | 0.0E+00 | 28.3 (25)  | 28.4 (25)  | 8.6E-01 |

|         |       |            |            |         |               |            |         |            |            |         |
|---------|-------|------------|------------|---------|---------------|------------|---------|------------|------------|---------|
| YLR354C | TAL1  | 29.2 (45)  | 24.5 (95)  | 1.3E-02 | 0 (0)         | 0 (0)      | 0.0E+00 | 29.2 (45)  | 24.5 (95)  | 1.3E-02 |
| YBR223C | TDP1  | 22.4 (10)  | 29.6 (10)  | 1.8E-01 | 0 (0)         | 0 (0)      | 0.0E+00 | 22.4 (10)  | 29.6 (10)  | 1.8E-01 |
| YBR240C | THI2  | 32.5 (30)  | 28.4 (30)  | 3.4E-01 | 0 (0)         | 0 (0)      | 0.0E+00 | 32.5 (30)  | 28.4 (30)  | 3.4E-01 |
| YHR167W | THP2  | 19 (5)     | 22.4 (5)   | 3.1E-01 | 0 (0)         | 0 (0)      | 0.0E+00 | 19 (5)     | 22.4 (5)   | 3.1E-01 |
| YKR059W | TIF1  | 30.1 (75)  | 26.7 (85)  | 2.5E-02 | 27.2<br>(120) | 23.8 (100) | 6.6E-03 | 28.3 (195) | 25.1 (185) | 1.3E-03 |
| YDR105C | TMS1  | 23.9 (10)  | 29.6 (10)  | 1.5E-01 | 0 (0)         | 0 (0)      | 0.0E+00 | 23.9 (10)  | 29.6 (10)  | 1.5E-01 |
| YER175C | TMT1  | 23.8 (65)  | 25 (75)    | 1.1E-01 | 0 (0)         | 0 (0)      | 0.0E+00 | 23.8 (65)  | 25 (75)    | 1.1E-01 |
| YMR060C | TOM37 | 17.2 (5)   | 28.8 (5)   | 4.2E-01 | 0 (0)         | 0 (0)      | 0.0E+00 | 17.2 (5)   | 28.8 (5)   | 4.2E-01 |
| YHR117W | TOM71 | 24.6 (5)   | 22.4 (5)   | 6.9E-01 | 0 (0)         | 0 (0)      | 0.0E+00 | 24.6 (5)   | 22.4 (5)   | 6.9E-01 |
| YJR066W | TOR1  | 33.3 (630) | 25.3 (640) | 6.0E-40 | 34 (80)       | 28.5 (100) | 3.5E-04 | 33.4 (710) | 25.7 (740) | 3.1E-42 |
| YGR096W | TPC1  | 21.7 (25)  | 28.4 (25)  | 1.4E-02 | 0 (0)         | 0 (0)      | 0.0E+00 | 21.7 (25)  | 28.4 (25)  | 1.4E-02 |
| YKR050W | TRK2  | 16.6 (5)   | 29 (5)     | 2.4E-01 | 0 (0)         | 0 (0)      | 0.0E+00 | 16.6 (5)   | 29 (5)     | 2.4E-01 |
| YDR120C | TRM1  | 22.5 (10)  | 29.6 (10)  | 1.5E-01 | 0 (0)         | 0 (0)      | 0.0E+00 | 22.5 (10)  | 29.6 (10)  | 1.5E-01 |
| YKR056W | TRM2  | 22.8 (10)  | 27.4 (10)  | 3.6E-01 | 0 (0)         | 0 (0)      | 0.0E+00 | 22.8 (10)  | 27.4 (10)  | 3.6E-01 |
| YHR106W | TRR2  | 26.3 (25)  | 26.3 (25)  | 9.1E-01 | 0 (0)         | 0 (0)      | 0.0E+00 | 26.3 (25)  | 26.3 (25)  | 9.1E-01 |
| YOR115C | TRS33 | 25.3 (10)  | 29.3 (10)  | 4.5E-01 | 0 (0)         | 0 (0)      | 0.0E+00 | 25.3 (10)  | 29.3 (10)  | 4.5E-01 |
| YLR425W | TUS1  | 17.6 (5)   | 28.8 (5)   | 2.1E-01 | 0 (0)         | 0 (0)      | 0.0E+00 | 17.6 (5)   | 28.8 (5)   | 2.1E-01 |
| YDR100W | TVP15 | 15.6 (10)  | 29.6 (10)  | 1.1E-03 | 0 (0)         | 0 (0)      | 0.0E+00 | 15.6 (10)  | 29.6 (10)  | 1.1E-03 |
| YDR084C | TVP23 | 21.4 (10)  | 29.6 (10)  | 1.2E-02 | 0 (0)         | 0 (0)      | 0.0E+00 | 21.4 (10)  | 29.6 (10)  | 1.2E-02 |
| YKR088C | TVP38 | 24.4 (5)   | 28.8 (5)   | 1.0E+00 | 0 (0)         | 0 (0)      | 0.0E+00 | 24.4 (5)   | 28.8 (5)   | 1.0E+00 |
| YGR080W | TWF1  | 17.4 (5)   | 32.8 (5)   | 5.6E-02 | 0 (0)         | 0 (0)      | 0.0E+00 | 17.4 (5)   | 32.8 (5)   | 5.6E-02 |
| YHR111W | UBA4  | 20 (5)     | 22.4 (5)   | 7.4E-01 | 0 (0)         | 0 (0)      | 0.0E+00 | 20 (5)     | 22.4 (5)   | 7.4E-01 |
| YDR092W | UBC13 | 22.2 (10)  | 29.6 (10)  | 1.6E-01 | 0 (0)         | 0 (0)      | 0.0E+00 | 22.2 (10)  | 29.6 (10)  | 1.6E-01 |
| YDR059C | UBC5  | 22.2 (10)  | 29.6 (10)  | 1.7E-01 | 0 (0)         | 0 (0)      | 0.0E+00 | 22.2 (10)  | 29.6 (10)  | 1.7E-01 |
| YKR098C | UBP11 | 21.6 (5)   | 28.8 (5)   | 5.7E-01 | 0 (0)         | 0 (0)      | 0.0E+00 | 21.6 (5)   | 28.8 (5)   | 5.7E-01 |
| YOR124C | UBP2  | 28.5 (15)  | 27 (25)    | 6.0E-01 | 0 (0)         | 0 (0)      | 0.0E+00 | 28.5 (15)  | 27 (25)    | 6.0E-01 |
| YML021C | UNG1  | 15.8 (5)   | 28.8 (5)   | 1.7E-01 | 0 (0)         | 0 (0)      | 0.0E+00 | 15.8 (5)   | 28.8 (5)   | 1.7E-01 |
| YGR072W | UPF3  | 24.6 (25)  | 26.7 (25)  | 2.5E-01 | 0 (0)         | 0 (0)      | 0.0E+00 | 24.6 (25)  | 26.7 (25)  | 2.5E-01 |
| YNL229C | URE2  | 31.9 (25)  | 24.6 (45)  | 1.2E-03 | 30.6 (40)     | 25.3 (60)  | 2.1E-02 | 31.1 (65)  | 25 (105)   | 3.7E-04 |
| YKR060W | UTP30 | 20.6 (5)   | 29 (5)     | 3.9E-01 | 0 (0)         | 0 (0)      | 0.0E+00 | 20.6 (5)   | 29 (5)     | 3.9E-01 |

|          |         |           |           |         |           |           |         |           |            |         |
|----------|---------|-----------|-----------|---------|-----------|-----------|---------|-----------|------------|---------|
| YLR386W  | VAC14   | 18.5 (10) | 22.7 (10) | 3.4E-01 | 0 (0)     | 0 (0)     | 0.0E+00 | 18.5 (10) | 22.7 (10)  | 3.4E-01 |
| YOR106W  | VAM3    | 14.4 (5)  | 32.8 (5)  | 3.2E-02 | 0 (0)     | 0 (0)     | 0.0E+00 | 14.4 (5)  | 32.8 (5)   | 3.2E-02 |
| YDR247W  | VHS1    | 34 (20)   | 25.9 (55) | 2.6E-02 | 25.4 (40) | 25.3 (60) | 4.0E-01 | 28.2 (60) | 25.6 (115) | 4.3E-01 |
| YLR373C  | VID22   | 12.2 (10) | 22.7 (10) | 3.4E-02 | 0 (0)     | 0 (0)     | 0.0E+00 | 12.2 (10) | 22.7 (10)  | 3.4E-02 |
| YGR105W  | VMA21   | 10.7 (14) | 24.9 (45) | 2.7E-06 | 0 (0)     | 0 (0)     | 0.0E+00 | 10.7 (14) | 24.9 (45)  | 2.7E-06 |
| YHR060W  | VMA22   | 12.6 (5)  | 22.4 (5)  | 5.6E-02 | 0 (0)     | 0 (0)     | 0.0E+00 | 12.6 (5)  | 22.4 (5)   | 5.6E-02 |
| YLR447C  | VMA6    | 12 (5)    | 28.8 (5)  | 3.2E-02 | 0 (0)     | 0 (0)     | 0.0E+00 | 12 (5)    | 28.8 (5)   | 3.2E-02 |
| YOR132W  | VPS17   | 25.8 (5)  | 32.8 (5)  | 4.5E-01 | 0 (0)     | 0 (0)     | 0.0E+00 | 25.8 (5)  | 32.8 (5)   | 4.5E-01 |
| YLR360W  | VPS38   | 29.3 (25) | 25.4 (35) | 5.5E-01 | 0 (0)     | 0 (0)     | 0.0E+00 | 29.3 (25) | 25.4 (35)  | 5.5E-01 |
| YDR080W  | VPS41   | 16.7 (10) | 29.6 (10) | 4.5E-03 | 0 (0)     | 0 (0)     | 0.0E+00 | 16.7 (10) | 29.6 (10)  | 4.5E-03 |
| YJR044C  | VPS55   | 26.8 (20) | 24.4 (20) | 7.6E-01 | 0 (0)     | 0 (0)     | 0.0E+00 | 26.8 (20) | 24.4 (20)  | 7.6E-01 |
| YHR134W  | WSS1    | 14.2 (5)  | 22.4 (5)  | 1.5E-01 | 0 (0)     | 0 (0)     | 0.0E+00 | 14.2 (5)  | 22.4 (5)   | 1.5E-01 |
| YHR161C  | YAP1801 | 25.7 (15) | 25 (25)   | 7.3E-01 | 0 (0)     | 0 (0)     | 0.0E+00 | 25.7 (15) | 25 (25)    | 7.3E-01 |
| YDR259C  | YAP6    | 24.1 (10) | 27.4 (10) | 5.7E-01 | 0 (0)     | 0 (0)     | 0.0E+00 | 24.1 (10) | 27.4 (10)  | 5.7E-01 |
| YHR135C  | YCK1    | 23.4 (5)  | 22.4 (5)  | 6.9E-01 | 0 (0)     | 0 (0)     | 0.0E+00 | 23.4 (5)  | 22.4 (5)   | 6.9E-01 |
| YDR057W  | YOS9    | 26.2 (90) | 29 (90)   | 9.5E-03 | 0 (0)     | 0 (0)     | 0.0E+00 | 26.2 (90) | 29 (90)    | 9.5E-03 |
| YBR264C  | YPT10   | 25 (30)   | 26.5 (30) | 6.0E-01 | 0 (0)     | 0 (0)     | 0.0E+00 | 25 (30)   | 26.5 (30)  | 6.0E-01 |
| YHR105W  | YPT35   | 28.8 (25) | 24.6 (65) | 4.1E-01 | 0 (0)     | 0 (0)     | 0.0E+00 | 28.8 (25) | 24.6 (65)  | 4.1E-01 |
| YOR172W  | YRM1    | 30.6 (25) | 28.4 (25) | 5.4E-01 | 0 (0)     | 0 (0)     | 0.0E+00 | 30.6 (25) | 28.4 (25)  | 5.4E-01 |
| YOR162C  | YRR1    | 29.7 (20) | 29 (35)   | 7.1E-01 | 0 (0)     | 0 (0)     | 0.0E+00 | 29.7 (20) | 29 (35)    | 7.1E-01 |
| YNR065C  | YSN1    | 24.8 (5)  | 28.8 (5)  | 8.9E-01 | 0 (0)     | 0 (0)     | 0.0E+00 | 24.8 (5)  | 28.8 (5)   | 8.9E-01 |
| YDR285W  | ZIP1    | 28.3 (20) | 27.2 (25) | 8.8E-01 | 21.2 (20) | 29.7 (20) | 2.7E-02 | 24.7 (40) | 28.3 (45)  | 8.9E-02 |
| YAL058CA |         | 23.6 (5)  | 28.8 (5)  | 9.5E-01 | 0 (0)     | 0 (0)     | 0.0E+00 | 23.6 (5)  | 28.8 (5)   | 9.5E-01 |
| YBR224W  |         | 24.3 (10) | 29.6 (10) | 1.7E-01 | 0 (0)     | 0 (0)     | 0.0E+00 | 24.3 (10) | 29.6 (10)  | 1.7E-01 |
| YBR225W  |         | 17.6 (10) | 29.6 (10) | 2.5E-02 | 0 (0)     | 0 (0)     | 0.0E+00 | 17.6 (10) | 29.6 (10)  | 2.5E-02 |
| YBR226C  |         | 31.8 (20) | 29.6 (20) | 4.9E-01 | 0 (0)     | 0 (0)     | 0.0E+00 | 31.8 (20) | 29.6 (20)  | 4.9E-01 |
| YBR230C  |         | 21.4 (10) | 29.6 (10) | 1.5E-01 | 0 (0)     | 0 (0)     | 0.0E+00 | 21.4 (10) | 29.6 (10)  | 1.5E-01 |
| YBR235W  |         | 24.3 (10) | 29.6 (10) | 6.8E-02 | 0 (0)     | 0 (0)     | 0.0E+00 | 24.3 (10) | 29.6 (10)  | 6.8E-02 |
| YBR238C  |         | 34.9 (20) | 27.9 (20) | 1.3E-02 | 33.9 (40) | 25.3 (60) | 1.9E-03 | 34.2 (60) | 25.9 (80)  | 4.4E-05 |
| YBR239C  |         | 24.1 (10) | 29.6 (10) | 3.6E-01 | 0 (0)     | 0 (0)     | 0.0E+00 | 24.1 (10) | 29.6 (10)  | 3.6E-01 |
| YBR241C  |         | 23.8 (10) | 29.6 (10) | 2.4E-01 | 0 (0)     | 0 (0)     | 0.0E+00 | 23.8 (10) | 29.6 (10)  | 2.4E-01 |

|         |           |           |         |           |           |         |           |            |         |
|---------|-----------|-----------|---------|-----------|-----------|---------|-----------|------------|---------|
| YBR242W | 27.7 (25) | 26.6 (30) | 5.7E-01 | 0 (0)     | 0 (0)     | 0.0E+00 | 27.7 (25) | 26.6 (30)  | 5.7E-01 |
| YBR246W | 25 (10)   | 29.6 (10) | 3.1E-01 | 0 (0)     | 0 (0)     | 0.0E+00 | 25 (10)   | 29.6 (10)  | 3.1E-01 |
| YBR250W | 25.5 (10) | 29.6 (10) | 2.7E-01 | 0 (0)     | 0 (0)     | 0.0E+00 | 25.5 (10) | 29.6 (10)  | 2.7E-01 |
| YBR255W | 34.1 (20) | 25.5 (50) | 1.7E-03 | 31.6 (40) | 25.3 (60) | 2.1E-03 | 32.4 (60) | 25.3 (110) | 1.3E-05 |
| YBR259W | 27.1 (30) | 28.4 (30) | 4.5E-01 | 0 (0)     | 0 (0)     | 0.0E+00 | 27.1 (30) | 28.4 (30)  | 4.5E-01 |
| YBR261C | 33.1 (20) | 27.9 (20) | 1.8E-01 | 0 (0)     | 0 (0)     | 0.0E+00 | 33.1 (20) | 27.9 (20)  | 1.8E-01 |
| YBR266C | 37.3 (80) | 27.3 (80) | 1.4E-07 | 36.4 (40) | 24.8 (40) | 1.4E-06 | 37 (120)  | 26.5 (120) | 1.5E-12 |
| YBR267W | 37.5 (50) | 27.3 (50) | 4.6E-05 | 36.5 (40) | 24.8 (40) | 1.9E-05 | 37.1 (90) | 26.2 (90)  | 3.7E-09 |
| YCL006C | 31.5 (25) | 25.1 (55) | 3.2E-02 | 0 (0)     | 0 (0)     | 0.0E+00 | 31.5 (25) | 25.1 (55)  | 3.2E-02 |
| YCL022C | 22 (5)    | 28.8 (5)  | 4.6E-01 | 0 (0)     | 0 (0)     | 0.0E+00 | 22 (5)    | 28.8 (5)   | 4.6E-01 |
| YCL023C | 31.7 (10) | 28.5 (10) | 4.3E-01 | 0 (0)     | 0 (0)     | 0.0E+00 | 31.7 (10) | 28.5 (10)  | 4.3E-01 |
| YCL074W | 17.8 (5)  | 28.8 (5)  | 3.8E-01 | 0 (0)     | 0 (0)     | 0.0E+00 | 17.8 (5)  | 28.8 (5)   | 3.8E-01 |
| YCL075W | 28.4 (30) | 26.9 (30) | 7.5E-01 | 0 (0)     | 0 (0)     | 0.0E+00 | 28.4 (30) | 26.9 (30)  | 7.5E-01 |
| YCL076W | 23 (5)    | 28.8 (5)  | 6.9E-01 | 0 (0)     | 0 (0)     | 0.0E+00 | 23 (5)    | 28.8 (5)   | 6.9E-01 |
| YDL061W | 25.5 (10) | 22.7 (10) | 4.3E-01 | 0 (0)     | 0 (0)     | 0.0E+00 | 25.5 (10) | 22.7 (10)  | 4.3E-01 |
| YDR049W | 22.4 (10) | 29.6 (10) | 4.5E-02 | 0 (0)     | 0 (0)     | 0.0E+00 | 22.4 (10) | 29.6 (10)  | 4.5E-02 |
| YDR051C | 22.1 (10) | 29.6 (10) | 5.3E-02 | 0 (0)     | 0 (0)     | 0.0E+00 | 22.1 (10) | 29.6 (10)  | 5.3E-02 |
| YDR056C | 28.7 (20) | 26.9 (30) | 7.8E-01 | 0 (0)     | 0 (0)     | 0.0E+00 | 28.7 (20) | 26.9 (30)  | 7.8E-01 |
| YDR061W | 25.1 (10) | 29.6 (10) | 2.7E-01 | 0 (0)     | 0 (0)     | 0.0E+00 | 25.1 (10) | 29.6 (10)  | 2.7E-01 |
| YDR063W | 23.8 (10) | 29.6 (10) | 6.9E-02 | 0 (0)     | 0 (0)     | 0.0E+00 | 23.8 (10) | 29.6 (10)  | 6.9E-02 |
| YDR065W | 15.6 (10) | 29.6 (10) | 2.8E-03 | 0 (0)     | 0 (0)     | 0.0E+00 | 15.6 (10) | 29.6 (10)  | 2.8E-03 |
| YDR066C | 27.5 (15) | 28.5 (15) | 9.7E-01 | 0 (0)     | 0 (0)     | 0.0E+00 | 27.5 (15) | 28.5 (15)  | 9.7E-01 |
| YDR067C | 25.6 (10) | 29.6 (10) | 5.2E-01 | 0 (0)     | 0 (0)     | 0.0E+00 | 25.6 (10) | 29.6 (10)  | 5.2E-01 |
| YDR089W | 20.8 (10) | 29.6 (10) | 3.4E-02 | 0 (0)     | 0 (0)     | 0.0E+00 | 20.8 (10) | 29.6 (10)  | 3.4E-02 |
| YDR090C | 25 (20)   | 27.6 (35) | 1.0E-01 | 0 (0)     | 0 (0)     | 0.0E+00 | 25 (20)   | 27.6 (35)  | 1.0E-01 |
| YDR094W | 23.6 (10) | 29.6 (10) | 1.4E-01 | 0 (0)     | 0 (0)     | 0.0E+00 | 23.6 (10) | 29.6 (10)  | 1.4E-01 |
| YDR095C | 20.1 (10) | 29.6 (10) | 3.6E-03 | 0 (0)     | 0 (0)     | 0.0E+00 | 20.1 (10) | 29.6 (10)  | 3.6E-03 |
| YDR102C | 26.7 (20) | 29.6 (20) | 2.3E-01 | 0 (0)     | 0 (0)     | 0.0E+00 | 26.7 (20) | 29.6 (20)  | 2.3E-01 |
| YDR107C | 24.7 (10) | 29.6 (10) | 4.5E-01 | 0 (0)     | 0 (0)     | 0.0E+00 | 24.7 (10) | 29.6 (10)  | 4.5E-01 |
| YDR109C | 25 (10)   | 29.6 (10) | 2.0E-01 | 0 (0)     | 0 (0)     | 0.0E+00 | 25 (10)   | 29.6 (10)  | 2.0E-01 |
| YDR112W | 20.9 (10) | 29.6 (10) | 4.5E-02 | 0 (0)     | 0 (0)     | 0.0E+00 | 20.9 (10) | 29.6 (10)  | 4.5E-02 |

|         |           |           |         |           |           |         |           |           |         |
|---------|-----------|-----------|---------|-----------|-----------|---------|-----------|-----------|---------|
| YDR117C | 23.2 (10) | 29.6 (10) | 1.7E-01 | 0 (0)     | 0 (0)     | 0.0E+00 | 23.2 (10) | 29.6 (10) | 1.7E-01 |
| YDR119W | 29.4 (25) | 29.9 (30) | 7.7E-01 | 0 (0)     | 0 (0)     | 0.0E+00 | 29.4 (25) | 29.9 (30) | 7.7E-01 |
| YDR124W | 35.4 (20) | 27.9 (20) | 1.5E-02 | 22.6 (40) | 25.3 (60) | 8.2E-02 | 26.8 (60) | 25.9 (80) | 9.2E-01 |
| YDR128W | 19.6 (10) | 29.6 (10) | 8.0E-03 | 0 (0)     | 0 (0)     | 0.0E+00 | 19.6 (10) | 29.6 (10) | 8.0E-03 |
| YDR131C | 24.7 (10) | 29.6 (10) | 1.6E-01 | 0 (0)     | 0 (0)     | 0.0E+00 | 24.7 (10) | 29.6 (10) | 1.6E-01 |
| YDR132C | 17.9 (10) | 29.6 (10) | 1.0E-02 | 0 (0)     | 0 (0)     | 0.0E+00 | 17.9 (10) | 29.6 (10) | 1.0E-02 |
| YDR133C | 22.9 (10) | 29.6 (10) | 1.2E-01 | 0 (0)     | 0 (0)     | 0.0E+00 | 22.9 (10) | 29.6 (10) | 1.2E-01 |
| YDR134C | 19.8 (10) | 29.6 (10) | 1.0E-02 | 0 (0)     | 0 (0)     | 0.0E+00 | 19.8 (10) | 29.6 (10) | 1.0E-02 |
| YDR248C | 34.6 (25) | 29.5 (25) | 2.5E-02 | 24 (40)   | 25.3 (60) | 2.4E-01 | 28.1 (65) | 26.5 (85) | 4.6E-01 |
| YDR249C | 25 (15)   | 29.1 (20) | 6.6E-02 | 0 (0)     | 0 (0)     | 0.0E+00 | 25 (15)   | 29.1 (20) | 6.6E-02 |
| YDR250C | 33.5 (30) | 28.4 (35) | 5.1E-02 | 0 (0)     | 0 (0)     | 0.0E+00 | 33.5 (30) | 28.4 (35) | 5.1E-02 |
| YDR262W | 21.4 (5)  | 29 (5)    | 4.6E-01 | 0 (0)     | 0 (0)     | 0.0E+00 | 21.4 (5)  | 29 (5)    | 4.6E-01 |
| YDR266C | 30.4 (20) | 26.9 (35) | 3.0E-01 | 0 (0)     | 0 (0)     | 0.0E+00 | 30.4 (20) | 26.9 (35) | 3.0E-01 |
| YDR274C | 35.6 (30) | 28.4 (35) | 8.7E-03 | 19.7 (40) | 21.1 (20) | 2.1E-01 | 26.5 (70) | 25.7 (55) | 8.0E-01 |
| YDR278C | 34.1 (15) | 29.4 (15) | 3.8E-01 | 0 (0)     | 0 (0)     | 0.0E+00 | 34.1 (15) | 29.4 (15) | 3.8E-01 |
| YDR282C | 17 (5)    | 29 (5)    | 9.5E-02 | 0 (0)     | 0 (0)     | 0.0E+00 | 17 (5)    | 29 (5)    | 9.5E-02 |
| YDR286C | 28 (20)   | 26.9 (35) | 8.3E-01 | 0 (0)     | 0 (0)     | 0.0E+00 | 28 (20)   | 26.9 (35) | 8.3E-01 |
| YDR287W | 10 (5)    | 29 (5)    | 3.2E-02 | 0 (0)     | 0 (0)     | 0.0E+00 | 10 (5)    | 29 (5)    | 3.2E-02 |
| YDR291W | 18.6 (5)  | 29 (5)    | 2.5E-01 | 0 (0)     | 0 (0)     | 0.0E+00 | 18.6 (5)  | 29 (5)    | 2.5E-01 |
| YDR306C | 27.8 (20) | 26.9 (35) | 6.5E-01 | 0 (0)     | 0 (0)     | 0.0E+00 | 27.8 (20) | 26.9 (35) | 6.5E-01 |
| YDR307W | 35.1 (20) | 26.9 (35) | 5.6E-03 | 23.2 (40) | 23.8 (40) | 7.1E-01 | 27.2 (60) | 25.2 (75) | 4.7E-01 |
| YDR314C | 35.9 (15) | 29.4 (15) | 4.5E-01 | 29.7 (20) | 21.3 (20) | 4.7E-03 | 32.4 (35) | 24.7 (35) | 1.1E-02 |
| YDR316W | 16.8 (5)  | 29 (5)    | 1.5E-01 | 0 (0)     | 0 (0)     | 0.0E+00 | 16.8 (5)  | 29 (5)    | 1.5E-01 |
| YDR317W | 28.1 (20) | 26.9 (35) | 6.7E-01 | 0 (0)     | 0 (0)     | 0.0E+00 | 28.1 (20) | 26.9 (35) | 6.7E-01 |
| YDR319C | 30.7 (20) | 26.9 (35) | 3.4E-01 | 0 (0)     | 0 (0)     | 0.0E+00 | 30.7 (20) | 26.9 (35) | 3.4E-01 |
| YDR326C | 28.4 (25) | 25.4 (35) | 4.0E-01 | 0 (0)     | 0 (0)     | 0.0E+00 | 28.4 (25) | 25.4 (35) | 4.0E-01 |
| YDR330W | 25.4 (5)  | 29 (5)    | 1.0E+00 | 0 (0)     | 0 (0)     | 0.0E+00 | 25.4 (5)  | 29 (5)    | 1.0E+00 |
| YDR333C | 19.2 (5)  | 29 (5)    | 2.1E-01 | 0 (0)     | 0 (0)     | 0.0E+00 | 19.2 (5)  | 29 (5)    | 2.1E-01 |
| YDR334W | 24.1 (30) | 26.9 (30) | 1.1E-01 | 0 (0)     | 0 (0)     | 0.0E+00 | 24.1 (30) | 26.9 (30) | 1.1E-01 |
| YDR336W | 26.8 (25) | 27.6 (25) | 6.8E-01 | 0 (0)     | 0 (0)     | 0.0E+00 | 26.8 (25) | 27.6 (25) | 6.8E-01 |
| YDR417C | 28.5 (20) | 22.7 (20) | 6.2E-02 | 0 (0)     | 0 (0)     | 0.0E+00 | 28.5 (20) | 22.7 (20) | 6.2E-02 |

|         |           |           |         |           |           |         |           |            |         |
|---------|-----------|-----------|---------|-----------|-----------|---------|-----------|------------|---------|
| YDR444W | 27.3 (10) | 22.7 (10) | 3.8E-01 | 0 (0)     | 0 (0)     | 0.0E+00 | 27.3 (10) | 22.7 (10)  | 3.8E-01 |
| YDR506C | 27.3 (30) | 25.3 (40) | 5.1E-01 | 0 (0)     | 0 (0)     | 0.0E+00 | 27.3 (30) | 25.3 (40)  | 5.1E-01 |
| YER181C | 27.6 (25) | 24 (55)   | 3.1E-01 | 0 (0)     | 0 (0)     | 0.0E+00 | 27.6 (25) | 24 (55)    | 3.1E-01 |
| YER184C | 21.2 (10) | 22.7 (10) | 4.0E-01 | 0 (0)     | 0 (0)     | 0.0E+00 | 21.2 (10) | 22.7 (10)  | 4.0E-01 |
| YER185W | 25.6 (20) | 24.4 (20) | 9.9E-01 | 0 (0)     | 0 (0)     | 0.0E+00 | 25.6 (20) | 24.4 (20)  | 9.9E-01 |
| YER186C | 31.6 (25) | 24 (55)   | 8.0E-03 | 24.4 (40) | 25.3 (60) | 3.3E-01 | 27.2 (65) | 24.7 (115) | 2.8E-01 |
| YER187W | 32.8 (35) | 25.4 (35) | 2.5E-02 | 24 (40)   | 25.3 (60) | 1.4E-01 | 28.1 (75) | 25.3 (95)  | 5.1E-01 |
| YGL199C | 21.2 (10) | 25.1 (10) | 3.2E-01 | 0 (0)     | 0 (0)     | 0.0E+00 | 21.2 (10) | 25.1 (10)  | 3.2E-01 |
| YGL214W | 31.7 (25) | 27.1 (35) | 2.0E-01 | 0 (0)     | 0 (0)     | 0.0E+00 | 31.7 (25) | 27.1 (35)  | 2.0E-01 |
| YGL217C | 30.2 (25) | 27.1 (35) | 3.5E-01 | 0 (0)     | 0 (0)     | 0.0E+00 | 30.2 (25) | 27.1 (35)  | 3.5E-01 |
| YGL235W | 32.6 (25) | 27.1 (35) | 4.0E-02 | 0 (0)     | 0 (0)     | 0.0E+00 | 32.6 (25) | 27.1 (35)  | 4.0E-02 |
| YGR011W | 26.8 (25) | 27.1 (35) | 8.1E-01 | 0 (0)     | 0 (0)     | 0.0E+00 | 26.8 (25) | 27.1 (35)  | 8.1E-01 |
| YGR018C | 25.7 (10) | 28.5 (10) | 8.8E-01 | 0 (0)     | 0 (0)     | 0.0E+00 | 25.7 (10) | 28.5 (10)  | 8.8E-01 |
| YGR022C | 23.7 (10) | 28.5 (10) | 6.0E-01 | 0 (0)     | 0 (0)     | 0.0E+00 | 23.7 (10) | 28.5 (10)  | 6.0E-01 |
| YGR054W | 23.7 (10) | 29.3 (10) | 2.9E-01 | 0 (0)     | 0 (0)     | 0.0E+00 | 23.7 (10) | 29.3 (10)  | 2.9E-01 |
| YGR058W | 19.8 (5)  | 32.8 (5)  | 1.6E-01 | 0 (0)     | 0 (0)     | 0.0E+00 | 19.8 (5)  | 32.8 (5)   | 1.6E-01 |
| YGR064W | 27.4 (25) | 28.4 (25) | 8.5E-01 | 0 (0)     | 0 (0)     | 0.0E+00 | 27.4 (25) | 28.4 (25)  | 8.5E-01 |
| YGR066C | 25.5 (20) | 25.9 (65) | 3.5E-01 | 0 (0)     | 0 (0)     | 0.0E+00 | 25.5 (20) | 25.9 (65)  | 3.5E-01 |
| YGR067C | 27.2 (15) | 27 (25)   | 9.7E-01 | 0 (0)     | 0 (0)     | 0.0E+00 | 27.2 (15) | 27 (25)    | 9.7E-01 |
| YGR068C | 26.6 (25) | 25.3 (25) | 8.2E-01 | 0 (0)     | 0 (0)     | 0.0E+00 | 26.6 (25) | 25.3 (25)  | 8.2E-01 |
| YGR069W | 27.8 (25) | 25.3 (25) | 2.1E-01 | 0 (0)     | 0 (0)     | 0.0E+00 | 27.8 (25) | 25.3 (25)  | 2.1E-01 |
| YGR071C | 13.8 (5)  | 32.8 (5)  | 3.2E-02 | 0 (0)     | 0 (0)     | 0.0E+00 | 13.8 (5)  | 32.8 (5)   | 3.2E-02 |
| YGR079W | 22.6 (10) | 29.3 (10) | 1.2E-01 | 0 (0)     | 0 (0)     | 0.0E+00 | 22.6 (10) | 29.3 (10)  | 1.2E-01 |
| YGR107W | 29.8 (25) | 25.3 (25) | 3.5E-01 | 0 (0)     | 0 (0)     | 0.0E+00 | 29.8 (25) | 25.3 (25)  | 3.5E-01 |
| YGR111W | 22.2 (5)  | 32.8 (5)  | 2.9E-01 | 0 (0)     | 0 (0)     | 0.0E+00 | 22.2 (5)  | 32.8 (5)   | 2.9E-01 |
| YGR122W | 23.9 (10) | 29.3 (10) | 2.9E-01 | 0 (0)     | 0 (0)     | 0.0E+00 | 23.9 (10) | 29.3 (10)  | 2.9E-01 |
| YHR022C | 21.8 (5)  | 22.4 (5)  | 8.4E-01 | 0 (0)     | 0 (0)     | 0.0E+00 | 21.8 (5)  | 22.4 (5)   | 8.4E-01 |
| YHR029C | 21 (5)    | 22.4 (5)  | 5.1E-01 | 0 (0)     | 0 (0)     | 0.0E+00 | 21 (5)    | 22.4 (5)   | 5.1E-01 |
| YHR033W | 23.8 (5)  | 22.4 (5)  | 8.7E-01 | 0 (0)     | 0 (0)     | 0.0E+00 | 23.8 (5)  | 22.4 (5)   | 8.7E-01 |
| YHR035W | 22 (5)    | 22.4 (5)  | 9.4E-01 | 0 (0)     | 0 (0)     | 0.0E+00 | 22 (5)    | 22.4 (5)   | 9.4E-01 |
| YHR048W | 23.6 (5)  | 22.4 (5)  | 8.9E-01 | 0 (0)     | 0 (0)     | 0.0E+00 | 23.6 (5)  | 22.4 (5)   | 8.9E-01 |



|          |           |           |         |           |           |         |           |           |         |
|----------|-----------|-----------|---------|-----------|-----------|---------|-----------|-----------|---------|
| YHR049CA | 24.4 (5)  | 22.4 (5)  | 4.8E-01 | 0 (0)     | 0 (0)     | 0.0E+00 | 24.4 (5)  | 22.4 (5)  | 4.8E-01 |
| YHR049W  | 23.8 (5)  | 22.4 (5)  | 9.5E-01 | 0 (0)     | 0 (0)     | 0.0E+00 | 23.8 (5)  | 22.4 (5)  | 9.5E-01 |
| YHR078W  | 21 (5)    | 22.4 (5)  | 1.0E+00 | 0 (0)     | 0 (0)     | 0.0E+00 | 21 (5)    | 22.4 (5)  | 1.0E+00 |
| YHR080C  | 23.8 (5)  | 22.4 (5)  | 7.3E-01 | 0 (0)     | 0 (0)     | 0.0E+00 | 23.8 (5)  | 22.4 (5)  | 7.3E-01 |
| YHR087W  | 23.1 (15) | 25 (25)   | 5.1E-01 | 0 (0)     | 0 (0)     | 0.0E+00 | 23.1 (15) | 25 (25)   | 5.1E-01 |
| YHR095W  | 16.8 (5)  | 22.4 (5)  | 1.5E-01 | 0 (0)     | 0 (0)     | 0.0E+00 | 16.8 (5)  | 22.4 (5)  | 1.5E-01 |
| YHR096W  | 26.5 (15) | 25 (25)   | 9.2E-01 | 0 (0)     | 0 (0)     | 0.0E+00 | 26.5 (15) | 25 (25)   | 9.2E-01 |
| YHR097C  | 26.8 (15) | 25 (25)   | 4.4E-01 | 0 (0)     | 0 (0)     | 0.0E+00 | 26.8 (15) | 25 (25)   | 4.4E-01 |
| YHR100C  | 15 (5)    | 22.4 (5)  | 2.2E-01 | 0 (0)     | 0 (0)     | 0.0E+00 | 15 (5)    | 22.4 (5)  | 2.2E-01 |
| YHR112C  | 24.6 (5)  | 22.4 (5)  | 6.0E-01 | 0 (0)     | 0 (0)     | 0.0E+00 | 24.6 (5)  | 22.4 (5)  | 6.0E-01 |
| YHR113W  | 28.6 (20) | 24.6 (65) | 2.4E-01 | 0 (0)     | 0 (0)     | 0.0E+00 | 28.6 (20) | 24.6 (65) | 2.4E-01 |
| YHR115C  | 20.2 (5)  | 22.4 (5)  | 7.4E-01 | 0 (0)     | 0 (0)     | 0.0E+00 | 20.2 (5)  | 22.4 (5)  | 7.4E-01 |
| YHR116W  | 10 (5)    | 22.4 (5)  | 1.6E-02 | 0 (0)     | 0 (0)     | 0.0E+00 | 10 (5)    | 22.4 (5)  | 1.6E-02 |
| YHR121W  | 24.4 (5)  | 22.4 (5)  | 7.4E-01 | 0 (0)     | 0 (0)     | 0.0E+00 | 24.4 (5)  | 22.4 (5)  | 7.4E-01 |
| YHR125W  | 20.6 (5)  | 22.4 (5)  | 6.5E-01 | 0 (0)     | 0 (0)     | 0.0E+00 | 20.6 (5)  | 22.4 (5)  | 6.5E-01 |
| YHR126C  | 19 (25)   | 26.3 (25) | 2.9E-03 | 0 (0)     | 0 (0)     | 0.0E+00 | 19 (25)   | 26.3 (25) | 2.9E-03 |
| YHR130C  | 35 (30)   | 24.7 (35) | 1.1E-04 | 23.7 (40) | 25.3 (60) | 2.1E-01 | 28.6 (70) | 25 (95)   | 1.0E-01 |
| YHR138C  | 28 (25)   | 26.3 (25) | 3.0E-01 | 0 (0)     | 0 (0)     | 0.0E+00 | 28 (25)   | 26.3 (25) | 3.0E-01 |
| YHR139CA | 27.5 (15) | 25 (25)   | 3.1E-01 | 0 (0)     | 0 (0)     | 0.0E+00 | 27.5 (15) | 25 (25)   | 3.1E-01 |
| YHR151C  | 27.2 (30) | 24.7 (35) | 4.6E-01 | 0 (0)     | 0 (0)     | 0.0E+00 | 27.2 (30) | 24.7 (35) | 4.6E-01 |
| YHR155W  | 19.4 (5)  | 22.4 (5)  | 6.0E-01 | 0 (0)     | 0 (0)     | 0.0E+00 | 19.4 (5)  | 22.4 (5)  | 6.0E-01 |
| YHR159W  | 22 (5)    | 22.4 (5)  | 8.9E-01 | 0 (0)     | 0 (0)     | 0.0E+00 | 22 (5)    | 22.4 (5)  | 8.9E-01 |
| YHR182W  | 17.2 (5)  | 22.4 (5)  | 2.9E-01 | 0 (0)     | 0 (0)     | 0.0E+00 | 17.2 (5)  | 22.4 (5)  | 2.9E-01 |
| YIL001W  | 31.8 (25) | 27.6 (25) | 1.5E-01 | 0 (0)     | 0 (0)     | 0.0E+00 | 31.8 (25) | 27.6 (25) | 1.5E-01 |
| YIL056W  | 21 (10)   | 22.7 (10) | 6.5E-01 | 0 (0)     | 0 (0)     | 0.0E+00 | 21 (10)   | 22.7 (10) | 6.5E-01 |
| YIL102C  | 26.5 (25) | 25.2 (25) | 8.2E-01 | 0 (0)     | 0 (0)     | 0.0E+00 | 26.5 (25) | 25.2 (25) | 8.2E-01 |
| YIL158W  | 23.8 (25) | 25.4 (35) | 2.4E-01 | 0 (0)     | 0 (0)     | 0.0E+00 | 23.8 (25) | 25.4 (35) | 2.4E-01 |
| YJR039W  | 25 (10)   | 22.7 (10) | 3.6E-01 | 0 (0)     | 0 (0)     | 0.0E+00 | 25 (10)   | 22.7 (10) | 3.6E-01 |
| YKR045C  | 28.2 (20) | 28.4 (35) | 7.3E-01 | 0 (0)     | 0 (0)     | 0.0E+00 | 28.2 (20) | 28.4 (35) | 7.3E-01 |
| YKR047W  | 23.2 (5)  | 29 (5)    | 6.5E-01 | 0 (0)     | 0 (0)     | 0.0E+00 | 23.2 (5)  | 29 (5)    | 6.5E-01 |
| YKR051W  | 25.4 (5)  | 29 (5)    | 8.8E-01 | 0 (0)     | 0 (0)     | 0.0E+00 | 25.4 (5)  | 29 (5)    | 8.8E-01 |

|          |           |           |         |           |           |         |           |           |         |
|----------|-----------|-----------|---------|-----------|-----------|---------|-----------|-----------|---------|
| YKR064W  | 25.6 (20) | 28.4 (35) | 1.3E-01 | 0 (0)     | 0 (0)     | 0.0E+00 | 25.6 (20) | 28.4 (35) | 1.3E-01 |
| YKR087C  | 9.2 (5)   | 28.8 (5)  | 1.6E-02 | 0 (0)     | 0 (0)     | 0.0E+00 | 9.2 (5)   | 28.8 (5)  | 1.6E-02 |
| YKR089C  | 23.3 (20) | 26.9 (30) | 1.1E-01 | 0 (0)     | 0 (0)     | 0.0E+00 | 23.3 (20) | 26.9 (30) | 1.1E-01 |
| YKR100C  | 20.8 (5)  | 28.8 (5)  | 5.8E-01 | 0 (0)     | 0 (0)     | 0.0E+00 | 20.8 (5)  | 28.8 (5)  | 5.8E-01 |
| YKR105C  | 29.3 (20) | 24.8 (50) | 8.3E-02 | 21.2 (40) | 21.1 (20) | 9.7E-01 | 23.9 (60) | 23.7 (70) | 9.9E-01 |
| YLR262CA | 29.8 (20) | 26.9 (30) | 3.3E-01 | 0 (0)     | 0 (0)     | 0.0E+00 | 29.8 (20) | 26.9 (30) | 3.3E-01 |
| YLR345W  | 19.2 (15) | 23.7 (15) | 1.2E-01 | 0 (0)     | 0 (0)     | 0.0E+00 | 19.2 (15) | 23.7 (15) | 1.2E-01 |
| YLR349W  | 30.1 (25) | 25.4 (35) | 1.4E-01 | 0 (0)     | 0 (0)     | 0.0E+00 | 30.1 (25) | 25.4 (35) | 1.4E-01 |
| YLR352W  | 23.4 (25) | 24 (55)   | 8.2E-01 | 0 (0)     | 0 (0)     | 0.0E+00 | 23.4 (25) | 24 (55)   | 8.2E-01 |
| YLR356W  | 19 (10)   | 22.7 (10) | 3.0E-01 | 0 (0)     | 0 (0)     | 0.0E+00 | 19 (10)   | 22.7 (10) | 3.0E-01 |
| YLR364W  | 27.6 (25) | 25.4 (35) | 4.5E-01 | 0 (0)     | 0 (0)     | 0.0E+00 | 27.6 (25) | 25.4 (35) | 4.5E-01 |
| YLR365W  | 23.8 (15) | 23.7 (15) | 7.4E-01 | 0 (0)     | 0 (0)     | 0.0E+00 | 23.8 (15) | 23.7 (15) | 7.4E-01 |
| YLR366W  | 30.9 (30) | 25.5 (40) | 8.5E-02 | 0 (0)     | 0 (0)     | 0.0E+00 | 30.9 (30) | 25.5 (40) | 8.5E-02 |
| YLR374C  | 19 (10)   | 22.7 (10) | 7.6E-01 | 0 (0)     | 0 (0)     | 0.0E+00 | 19 (10)   | 22.7 (10) | 7.6E-01 |
| YLR385C  | 26.4 (25) | 25.4 (35) | 7.7E-01 | 0 (0)     | 0 (0)     | 0.0E+00 | 26.4 (25) | 25.4 (35) | 7.7E-01 |
| YLR387C  | 25.9 (25) | 25.4 (35) | 6.1E-01 | 0 (0)     | 0 (0)     | 0.0E+00 | 25.9 (25) | 25.4 (35) | 6.1E-01 |
| YLR422W  | 33.9 (30) | 26.9 (30) | 2.4E-02 | 20.8 (40) | 21.1 (20) | 7.0E-01 | 26.4 (70) | 24.5 (50) | 6.5E-01 |
| YLR426W  | 18.6 (25) | 25.8 (25) | 7.6E-03 | 0 (0)     | 0 (0)     | 0.0E+00 | 18.6 (25) | 25.8 (25) | 7.6E-03 |
| YLR428C  | 28.2 (20) | 26.9 (30) | 7.7E-01 | 0 (0)     | 0 (0)     | 0.0E+00 | 28.2 (20) | 26.9 (30) | 7.7E-01 |
| YLR434C  | 22.8 (5)  | 28.8 (5)  | 4.5E-01 | 0 (0)     | 0 (0)     | 0.0E+00 | 22.8 (5)  | 28.8 (5)  | 4.5E-01 |
| YLR437C  | 21.8 (20) | 26.9 (30) | 5.0E-02 | 0 (0)     | 0 (0)     | 0.0E+00 | 21.8 (20) | 26.9 (30) | 5.0E-02 |
| YLR444C  | 23.4 (20) | 26.9 (30) | 1.1E-01 | 0 (0)     | 0 (0)     | 0.0E+00 | 23.4 (20) | 26.9 (30) | 1.1E-01 |
| YLR445W  | 13 (5)    | 28.8 (5)  | 3.2E-02 | 0 (0)     | 0 (0)     | 0.0E+00 | 13 (5)    | 28.8 (5)  | 3.2E-02 |
| YLR446W  | 24.2 (5)  | 28.8 (5)  | 6.9E-01 | 0 (0)     | 0 (0)     | 0.0E+00 | 24.2 (5)  | 28.8 (5)  | 6.9E-01 |
| YLR456W  | 21.6 (5)  | 28.8 (5)  | 5.2E-01 | 0 (0)     | 0 (0)     | 0.0E+00 | 21.6 (5)  | 28.8 (5)  | 5.2E-01 |
| YLR460C  | 19.5 (20) | 26.9 (30) | 7.2E-03 | 0 (0)     | 0 (0)     | 0.0E+00 | 19.5 (20) | 26.9 (30) | 7.2E-03 |
| YML010CB | 23.9 (30) | 26.9 (30) | 2.4E-01 | 0 (0)     | 0 (0)     | 0.0E+00 | 23.9 (30) | 26.9 (30) | 2.4E-01 |
| YMR052CA | 26.2 (25) | 25.4 (35) | 8.9E-01 | 0 (0)     | 0 (0)     | 0.0E+00 | 26.2 (25) | 25.4 (35) | 8.9E-01 |
| YMR057C  | 28.2 (25) | 24 (55)   | 4.4E-01 | 0 (0)     | 0 (0)     | 0.0E+00 | 28.2 (25) | 24 (55)   | 4.4E-01 |
| YMR158CB | 19.6 (5)  | 28.8 (5)  | 2.9E-01 | 0 (0)     | 0 (0)     | 0.0E+00 | 19.6 (5)  | 28.8 (5)  | 2.9E-01 |
| YMR194CA | 21.4 (5)  | 28.8 (5)  | 6.9E-01 | 0 (0)     | 0 (0)     | 0.0E+00 | 21.4 (5)  | 28.8 (5)  | 6.9E-01 |

|          |           |           |         |           |           |         |           |            |         |
|----------|-----------|-----------|---------|-----------|-----------|---------|-----------|------------|---------|
| YMR326C  | 15.6 (5)  | 28.8 (5)  | 1.3E-01 | 0 (0)     | 0 (0)     | 0.0E+00 | 15.6 (5)  | 28.8 (5)   | 1.3E-01 |
| YNR061C  | 26.9 (20) | 26.9 (30) | 4.6E-01 | 0 (0)     | 0 (0)     | 0.0E+00 | 26.9 (20) | 26.9 (30)  | 4.6E-01 |
| YNR062C  | 23.4 (20) | 26.9 (30) | 1.2E-01 | 0 (0)     | 0 (0)     | 0.0E+00 | 23.4 (20) | 26.9 (30)  | 1.2E-01 |
| YNR063W  | 22.4 (5)  | 28.8 (5)  | 6.8E-01 | 0 (0)     | 0 (0)     | 0.0E+00 | 22.4 (5)  | 28.8 (5)   | 6.8E-01 |
| YNR064C  | 18.2 (5)  | 28.8 (5)  | 3.3E-01 | 0 (0)     | 0 (0)     | 0.0E+00 | 18.2 (5)  | 28.8 (5)   | 3.3E-01 |
| YNR066C  | 14 (5)    | 28.8 (5)  | 4.0E-02 | 0 (0)     | 0 (0)     | 0.0E+00 | 14 (5)    | 28.8 (5)   | 4.0E-02 |
| YNR068C  | 12.4 (5)  | 28.8 (5)  | 5.6E-02 | 0 (0)     | 0 (0)     | 0.0E+00 | 12.4 (5)  | 28.8 (5)   | 5.6E-02 |
| YOR008CA | 29.2 (20) | 26.9 (30) | 1.9E-01 | 0 (0)     | 0 (0)     | 0.0E+00 | 29.2 (20) | 26.9 (30)  | 1.9E-01 |
| YOR097C  | 30.6 (25) | 25.3 (25) | 2.2E-01 | 0 (0)     | 0 (0)     | 0.0E+00 | 30.6 (25) | 25.3 (25)  | 2.2E-01 |
| YOR105W  | 25.3 (25) | 25.3 (25) | 8.2E-01 | 0 (0)     | 0 (0)     | 0.0E+00 | 25.3 (25) | 25.3 (25)  | 8.2E-01 |
| YOR111W  | 28.3 (40) | 25.4 (85) | 2.3E-01 | 32.1 (20) | 31 (40)   | 7.2E-01 | 29.5 (60) | 27.2 (125) | 2.1E-01 |
| YOR112W  | 25.8 (25) | 25.3 (25) | 9.4E-01 | 0 (0)     | 0 (0)     | 0.0E+00 | 25.8 (25) | 25.3 (25)  | 9.4E-01 |
| YOR114W  | 25.8 (5)  | 32.8 (5)  | 5.5E-01 | 0 (0)     | 0 (0)     | 0.0E+00 | 25.8 (5)  | 32.8 (5)   | 5.5E-01 |
| YOR118W  | 28.6 (20) | 25.9 (65) | 6.0E-01 | 0 (0)     | 0 (0)     | 0.0E+00 | 28.6 (20) | 25.9 (65)  | 6.0E-01 |
| YOR121C  | 21.2 (5)  | 32.8 (5)  | 2.2E-01 | 0 (0)     | 0 (0)     | 0.0E+00 | 21.2 (5)  | 32.8 (5)   | 2.2E-01 |
| YOR129C  | 18 (5)    | 32.8 (5)  | 1.3E-01 | 0 (0)     | 0 (0)     | 0.0E+00 | 18 (5)    | 32.8 (5)   | 1.3E-01 |
| YOR131C  | 23.7 (10) | 29.3 (10) | 3.6E-01 | 0 (0)     | 0 (0)     | 0.0E+00 | 23.7 (10) | 29.3 (10)  | 3.6E-01 |
| YOR135C  | 31 (20)   | 25.4 (65) | 7.3E-02 | 29.5 (40) | 24.8 (40) | 2.4E-03 | 30 (60)   | 25.2 (105) | 3.2E-04 |
| YOR139C  | 25.6 (10) | 29.3 (10) | 5.0E-01 | 0 (0)     | 0 (0)     | 0.0E+00 | 25.6 (10) | 29.3 (10)  | 5.0E-01 |
| YOR152C  | 21.8 (5)  | 32.8 (5)  | 1.3E-01 | 0 (0)     | 0 (0)     | 0.0E+00 | 21.8 (5)  | 32.8 (5)   | 1.3E-01 |
| YOR154W  | 25.6 (5)  | 32.8 (5)  | 3.8E-01 | 0 (0)     | 0 (0)     | 0.0E+00 | 25.6 (5)  | 32.8 (5)   | 3.8E-01 |
| YOR161C  | 22.9 (10) | 29.3 (10) | 1.6E-01 | 0 (0)     | 0 (0)     | 0.0E+00 | 22.9 (10) | 29.3 (10)  | 1.6E-01 |
| YOR164C  | 22.6 (5)  | 32.8 (5)  | 3.1E-01 | 0 (0)     | 0 (0)     | 0.0E+00 | 22.6 (5)  | 32.8 (5)   | 3.1E-01 |
| YOR166C  | 33.7 (25) | 28.4 (25) | 6.3E-02 | 0 (0)     | 0 (0)     | 0.0E+00 | 33.7 (25) | 28.4 (25)  | 6.3E-02 |
| YOR170W  | 23.3 (10) | 29.3 (10) | 2.1E-01 | 0 (0)     | 0 (0)     | 0.0E+00 | 23.3 (10) | 29.3 (10)  | 2.1E-01 |
| YOR175C  | 22.9 (10) | 29.3 (10) | 9.6E-02 | 0 (0)     | 0 (0)     | 0.0E+00 | 22.9 (10) | 29.3 (10)  | 9.6E-02 |

**References:**

1. Kaeberlein M, Powers RW, 3rd, Steffen KK, Westman EA, Hu D, et al. (2005) Regulation of yeast replicative life span by TOR and Sch9 in response to nutrients. *Science* 310: 1193-1196.
2. Kaeberlein M, Kennedy BK (2005) Large-scale identification in yeast of conserved ageing genes. *Mech Ageing Dev* 126: 17-21.
