# Supplementary material for: Shortest-Path Network Analysis Is a Useful Approach toward Identifying Genetic Determinants of Longevity
Source: PubMed Central journal article supplement (PMC2583956; doi:10.1371/journal.pone.0003802), 2008-11-25
Supplement: pone.0003802.s008.pdf [file pone.0003802.s008.pdf]

**Table S6. Genes contained in both the randomly selected set of 564 single-gene deletion strains and the predicted longevity associated genes in the binding shortest path longevity network.** (A) Replicative life span for each haploid deletion ( $\Delta$ ) and experiment matched wild type mother cells are shown as mean replicative life span with number of cells assayed in parentheses. *P*-value is calculated by a Wilcoxon Rank-Sum test. Pooled haploid data refers to pooled *MAT $\alpha$*  and *MATa* deletion and wild type data. The binding shortest path longevity network is still enriched for both (B) long-lived and (C) short-lived deletion strains, relative to the set of randomly selected deletion strains (R564), when these 11 genes are excluded from the analysis. The *p*-value category refers to the results of a Fisher's exact test comparing the frequency of (B) increased or (C) decreased RLS in the R564 set to the Binding SPLN. \*Denotes removal of the 11 overlapping ORFs. Statistical analysis with the 11 overlapping ORFs included is shown in Tables 1 and 2.

## A

| ORF     | GENE | <i>MAT<math>\alpha</math></i> |           |         | <i>MATa</i> |            |         | Pooled haploid mating types |            |         |
|---------|------|-------------------------------|-----------|---------|-------------|------------|---------|-----------------------------|------------|---------|
|         |      | $\Delta$                      | BY4742    | p-value | $\Delta$    | BY4741     | p-value | $\Delta$                    | WT Pooled  | p-value |
| YDR101C | ARX1 | 24.4 (25)                     | 24.5 (35) | 7.6E-01 | 0 (0)       | 0 (0)      | 0.0E+00 | 24.4 (25)                   | 24.5 (35)  | 7.6E-01 |
| YER177W | BMH1 | 20.1 (10)                     | 22.7 (10) | 6.8E-01 | 0 (0)       | 0 (0)      | 0.0E+00 | 20.1 (10)                   | 22.7 (10)  | 6.8E-01 |
| YDR099W | BMH2 | 26.1 (15)                     | 28.5 (15) | 3.0E-01 | 0 (0)       | 0 (0)      | 0.0E+00 | 26.1 (15)                   | 28.5 (15)  | 3.0E-01 |
| YHR142W | CHS7 | 18 (5)                        | 22.4 (5)  | 4.6E-01 | 0 (0)       | 0 (0)      | 0.0E+00 | 18 (5)                      | 22.4 (5)   | 4.6E-01 |
| YOR144C | ELG1 | 25 (5)                        | 32.8 (5)  | 3.8E-01 | 0 (0)       | 0 (0)      | 0.0E+00 | 25 (5)                      | 32.8 (5)   | 3.8E-01 |
| YDR283C | GCN2 | 25.7 (495)                    | 27 (565)  | 2.8E-02 | 23.3 (180)  | 28.8 (220) | 1.1E-08 | 25.1 (675)                  | 27.5 (785) | 8.5E-07 |
| YKR048C | NAP1 | 24.6 (45)                     | 27.2 (45) | 6.3E-02 | 0 (0)       | 0 (0)      | 0.0E+00 | 24.6 (45)                   | 27.2 (45)  | 6.3E-02 |
| YLR350W | ORM2 | 22.6 (10)                     | 22.7 (10) | 7.0E-01 | 0 (0)       | 0 (0)      | 0.0E+00 | 22.6 (10)                   | 22.7 (10)  | 7.0E-01 |
| YGR087C | PDC6 | 24.5 (25)                     | 24.2 (45) | 7.6E-01 | 0 (0)       | 0 (0)      | 0.0E+00 | 24.5 (25)                   | 24.2 (45)  | 7.6E-01 |
| YDR129C | SAC6 | 14.7 (30)                     | 25.8 (60) | 2.4E-05 | 0 (0)       | 0 (0)      | 0.0E+00 | 14.7 (30)                   | 25.8 (60)  | 2.4E-05 |
| YDR477W | SNF1 | 38.8 (40)                     | 25.5 (40) | 2.4E-06 | 26.1 (100)  | 27 (120)   | 3.5E-01 | 29.8 (140)                  | 26.6 (160) | 4.9E-02 |

**B**

| <b>Dataset</b>     | <b>Both Haploid Mating Types</b> | <b><i>p</i> - value</b> | <b>Pooled &lt; 0.05</b> | <b><i>p</i> - value</b> |
|--------------------|----------------------------------|-------------------------|-------------------------|-------------------------|
| Binding SPLN* (77) | 9.1 % (7)                        | -                       | 16.9% (13)              | -                       |
| R564* (553)        | 2.7% (15)                        | 0.01                    | 4.2% (23)               | 1.2 x 10 <sup>-4</sup>  |

**C**

| <b>Dataset</b>     | <b>Mean RLS &lt; 15</b> | <b><i>p</i> - value</b> | <b>Mean RLS &lt; 20</b> | <b><i>p</i> - value</b> |
|--------------------|-------------------------|-------------------------|-------------------------|-------------------------|
| Binding SPLN* (77) | 16.9 % (13)             | -                       | 41.6% (32)              | -                       |
| R564* (553)        | 3.4% (19)               | 2.6 x 10 <sup>-5</sup>  | 17.4% (96)              | 4.0 x 10 <sup>-6</sup>  |
