# Supplementary material for: Shortest-Path Network Analysis Is a Useful Approach toward Identifying Genetic Determinants of Longevity
Source: PubMed Central journal article supplement (PMC2583956; doi:10.1371/journal.pone.0003802), 2008-11-25
Supplement: pone.0003802.s010.pdf [file pone.0003802.s010.pdf]

**Table S8. The first neighbors longevity network has less predictive power than the Binding SPLN. (A)** The first neighbors longevity network consists of 1375

gene/proteins, of which RLS data is has been obtained for 937 corresponding single-gene deletion mutants. The percentage of single-gene deletion strains that are long-lived in both mating types, long-lived when data from both mating types are pooled, or short-lived (mean life span < 15 or < 20 generations) is shown for the first neighbors longevity network and compared to the current dataset for the entire deletion collection (DELSET). The number of strains in each category is shown in parentheses. The *p*-value category refers to the results of a 2-tailed Fisher’s Exact test comparing the DELSET to the First Neighbors in each category. **(B)** The components of the first neighbors longevity network.

**A.**

| Dataset                              | DELSET (4681) | First Neighbors (968) | p-value              |
|--------------------------------------|---------------|-----------------------|----------------------|
| Long-lived both haploid mating types | 1.5% (72)     | 1.9% (18)             | 0.48                 |
| Long-lived pooled                    | 6.1% (288)    | 6.6% (62)             | 0.55                 |
| Short-lived < 15                     | 5% (231)      | 8.2% (76)             | $2.0 \times 10^{-4}$ |
| Short-lived < 20                     | 17.5% (818)   | 23.6% (221)           | $1.8 \times 10^{-5}$ |

**B.**

|            |             |            |             |            |             |
|------------|-------------|------------|-------------|------------|-------------|
| <b>ORF</b> | <b>Gene</b> | <b>ORF</b> | <b>Gene</b> | <b>ORF</b> | <b>Gene</b> |
| YAL003W    | EFB1        | YBR039W    | ATP3        | YBR275C    | RIF1        |
| YAL005C    | SSA1        | YBR040W    | FIG1        | YBR039W    | ATP3        |
| YAL013W    | DEP1        | YBR052C    | RFS1        | YBR040W    | FIG1        |
| YAL016W    | TPD3        | YBR060C    | ORC2        | YBR052C    | RFS1        |
| YAL021C    | CCR4        | YBR083W    | TEC1        | YBR060C    | ORC2        |
| YAL024C    | LTE1        | YBR084W    | MIS1        | YBR083W    | TEC1        |
| YAL026C    | DRS2        | YBR085W    | AAC3        | YBR084W    | MIS1        |
| YAL028W    | FRT2        | YBR087W    | RFC5        | YBR085W    | AAC3        |
| YAL030W    | SNC1        | YBR093C    | PHO5        | YBR087W    | RFC5        |
| YAL038W    | CDC19       | YBR095C    | RXT2        | YBR093C    | PHO5        |
| YAL040C    | CLN3        | YBR103W    | SIF2        | YBR095C    | RXT2        |

|          |        |         |        |         |        |
|----------|--------|---------|--------|---------|--------|
| YAL055W  | PEX22  | YBR112C | CYC8   | YBR103W | SIF2   |
| YAL056W  | GPB2   | YBR122C | MRPL36 | YBR112C | CYC8   |
| YAR010C  |        | YBR125C | PTC4   | YBR122C | MRPL36 |
| YAR014C  | BUD14  | YBR126C | TPS1   | YBR125C | PTC4   |
| YAR019C  | CDC15  | YBR128C | ATG14  | YBR126C | TPS1   |
| YBL003C  | HTA2   | YBR130C | SHE3   | YBR128C | ATG14  |
| YBL004W  | UTP20  | YBR133C | HSL7   | YBR130C | SHE3   |
| YBL007C  | SLA1   | YBR135W | CKS1   | YBR133C | HSL7   |
| YBL008W  | HIR1   | YBR136W | MEC1   | YBR135W | CKS1   |
| YBL014C  | RRN6   | YBR139W |        | YBR136W | MEC1   |
| YBL015W  | ACH1   | YBR140C | IRA1   | YBR139W |        |
| YBL016W  | FUS3   | YBR142W | MAK5   | YBR140C | IRA1   |
| YBL022C  | PIM1   | YBR143C | SUP45  | YBR142W | MAK5   |
| YBL032W  | HEK2   | YBR150C | TBS1   | YBR143C | SUP45  |
| YBL034C  | STU1   | YBR154C | RPB5   | YBR150C | TBS1   |
| YBL038W  | MRPL16 | YBR160W | CDC28  | YBR154C | RPB5   |
| YBL046W  | PSY4   | YBR164C | ARL1   | YBR160W | CDC28  |
| YBL047C  | EDE1   | YBR169C | SSE2   | YBR164C | ARL1   |
| YBL051C  | PIN4   | YBR183W | YPC1   | YBR169C | SSE2   |
| YBL061C  | SKT5   | YBR184W |        | YBR183W | YPC1   |
| YBL075C  | SSA3   | YBR193C | MED8   | YBR184W |        |
| YBL076C  | ILS1   | YBR195C | MSI1   | YBR193C | MED8   |
| YBL084C  | CDC27  | YBR198C | TAF5   | YBR195C | MSI1   |
| YBL085W  | BOI1   | YBR202W | MCM7   | YBR198C | TAF5   |
| YBL098W  | BNA4   | YBR205W | KTR3   | YBR202W | MCM7   |
| YBL100WC |        | YBR218C | PYC2   | YBR205W | KTR3   |
| YBL103C  | RTG3   | YBR225W |        | YBR218C | PYC2   |
| YBL104C  |        | YBR227C | MCX1   | YBR225W |        |
| YBL105C  | PKC1   | YBR231C | SWC5   | YBR227C | MCX1   |
| YBL108W  |        | YBR238C |        | YBR231C | SWC5   |
| YBR009C  | HHF1   | YBR245C | ISW1   | YBR238C |        |
| YBR010W  | HHT1   | YBR247C | ENP1   | YBR245C | ISW1   |
| YBR011C  | IPP1   | YBR248C | HIS7   | YBR247C | ENP1   |
| YBR018C  | GAL7   | YBR249C | ARO4   | YBR248C | HIS7   |
| YBR019C  | GAL10  | YBR252W | DUT1   | YBR249C | ARO4   |
| YBR023C  | CHS3   | YBR255W |        | YBR252W | DUT1   |
| YBR025C  | OLA1   | YBR264C | YPT10  | YBR255W |        |
| YBR028C  |        | YBR266C | SLM6   | YBR264C | YPT10  |
| YBR029C  | CDS1   | YBR267W | REI1   | YBR266C | SLM6   |
| YBR031W  | RPL4A  | YBR268W | MRPL37 | YBR267W | REI1   |
| YBR036C  | CSG2   | YBR274W | CHK1   | YBR268W | MRPL37 |
| YBR274W  | CHK1   | YDL058W | USO1   | YDR054C | CDC34  |
| YBR275C  | RIF1   | YDL059C | RAD59  | YDR060W | MAK21  |
| YBR276C  | PPS1   | YDL060W | TSR1   | YDR061W |        |
| YBR279W  | PAF1   | YDL065C | PEX19  | YDR074W | TPS2   |
| YBR281C  | DUG2   | YDL074C | BRE1   | YDR075W | PPH3   |
| YBR287W  |        | YDL076C | RXT3   | YDR076W | RAD55  |
| YBR289W  | SNF5   | YDL085W | NDE2   | YDR085C | AFR1   |
| YBR290W  | BSD2   | YDL097C | RPN6   | YDR088C | SLU7   |
| YCL009C  | ILV6   | YDL100C | GET3   | YDR091C | RLI1   |
| YCL016C  | DCC1   | YDL108W | KIN28  | YDR096W | GIS1   |
| YCL025C  | AGP1   | YDL110C | TMA17  | YDR099W | BMH2   |
| YCL029C  | BIK1   | YDL112W | TRM3   | YDR101C | ARX1   |
| YCL030C  | HIS4   | YDL117W | CYK3   | YDR103W | STE5   |

|          |           |         |        |          |        |
|----------|-----------|---------|--------|----------|--------|
| YCL035C  | GRX1      | YDL120W | YFH1   | YDR108W  | GSG1   |
| YCL040W  | GLK1      | YDL124W |        | YDR110W  | FOB1   |
| YCL046W  |           | YDL126C | CDC48  | YDR115W  |        |
| YCL061C  | MRC1      | YDL127W | PCL2   | YDR126W  | SWF1   |
| YCL065W  |           | YDL129W |        | YDR129C  | SAC6   |
| YCL076W  |           | YDL132W | CDC53  | YDR137W  | RGP1   |
| YCR005C  | CIT2      | YDL134C | PPH21  | YDR138W  | HPR1   |
| YCR009C  | RVS161    | YDL137W | ARF2   | YDR141C  | DOP1   |
| YCR018C  | SRD1      | YDL140C | RPO21  | YDR143C  | SAN1   |
| YCR018CA |           | YDL147W | RPN5   | YDR146C  | SWI5   |
| YCR019W  | MAK32     | YDL150W | RPC53  | YDR148C  | KGD2   |
| YCR030C  | SYP1      | YDL153C | SAS10  | YDR162C  | NBP2   |
| YCR033W  | SNT1      | YDL155W | CLB3   | YDR168W  | CDC37  |
| YCR036W  | RBK1      | YDL160C | DHH1   | YDR170WA |        |
| YCR038C  | BUD5      | YDL166C | FAP7   | YDR172W  | SUP35  |
| YCR039C  | MATALPHA2 | YDL185W | TFP1   | YDR181C  | SAS4   |
| YCR040W  | MATALPHA1 | YDL188C | PPH22  | YDR188W  | CCT6   |
| YCR041W  |           | YDL191W | RPL35A | YDR190C  | RVB1   |
| YCR046C  | IMG1      | YDL192W | ARF1   | YDR195W  | REF2   |
| YCR053W  | THR4      | YDL195W | SEC31  | YDR196C  |        |
| YCR057C  | PWP2      | YDL203C |        | YDR200C  | VPS64  |
| YCR061W  |           | YDL213C | NOP6   | YDR201W  | SPC19  |
| YCR066W  | RAD18     | YDL214C | PRR2   | YDR207C  | UME6   |
| YCR071C  | IMG2      | YDL220C | CDC13  | YDR208W  | MSS4   |
| YCR084C  | TUP1      | YDL226C | GCS1   | YDR212W  | TCP1   |
| YCR093W  | CDC39     | YDL240W | LRG1   | YDR214W  | AHA1   |
| YCR096C  | HMRA2     | YDR001C | NTH1   | YDR216W  | ADR1   |
| YCR098C  | GIT1      | YDR004W | RAD57  | YDR217C  | RAD9   |
| YCR105W  | ADH7      | YDR006C | SOK1   | YDR224C  | HTB1   |
| YDL002C  | NHP10     | YDR007W | TRP1   | YDR226W  | ADK1   |
| YDL003W  | MCD1      | YDR009W | GAL3   | YDR227W  | SIR4   |
| YDL007W  | RPT2      | YDR017C | KCS1   | YDR233C  | RTN1   |
| YDL022W  | GPD1      | YDR023W | SES1   | YDR235W  | PRP42  |
| YDL029W  | ARP2      | YDR026C |        | YDR237W  | MRPL7  |
| YDL035C  | GPR1      | YDR027C | VPS54  | YDR257C  | SET7   |
| YDL040C  | NAT1      | YDR028C | REG1   | YDR259C  | YAP6   |
| YDL042C  | SIR2      | YDR032C | PST2   | YDR264C  | AKR1   |
| YDL047W  | SIT4      | YDR037W | KRS1   | YDR265W  | PEX10  |
| YDL051W  | LHP1      | YDR040C | ENA1   | YDR285W  | ZIP1   |
| YDL056W  | MBP1      | YDR050C | TPI1   | YDR287W  | INM2   |
| YDR288W  | NSE3      | YDR510W | SMT3   | YER093C  | TSC11  |
| YDR292C  | SRP101    | YDR516C | EMI2   | YER095W  | RAD51  |
| YDR293C  | SSD1      | YDR522C | SPS2   | YER099C  | PRS2   |
| YDR295C  | HDA2      | YDR543C |        | YER103W  | SSA4   |
| YDR296W  | MHR1      | YDR544C |        | YER109C  | FLO8   |
| YDR297W  | SUR2      | YDR545W | YRF1-1 | YER110C  | KAP123 |
| YDR298C  | ATP5      | YEL002C | WBP1   | YER111C  | SWI4   |
| YDR301W  | CFT1      | YEL003W | GIM4   | YER114C  | BOI2   |
| YDR309C  | GIC2      | YEL009C | GCN4   | YER120W  | SCS2   |
| YDR310C  | SUM1      | YEL013W | VAC8   | YER123W  | YCK3   |
| YDR320C  | SWA2      | YEL015W | EDC3   | YER125W  | RSP5   |
| YDR322W  | MRPL35    | YEL021W | URA3   | YER132C  | PMD1   |
| YDR328C  | SKP1      | YEL024W | RIP1   | YER133W  | GLC7   |
| YDR331W  | GPI8      | YEL025C |        | YER138C  |        |

|          |         |         |        |          |        |
|----------|---------|---------|--------|----------|--------|
| YDR334W  | SWR1    | YEL026W | SNU13  | YER146W  | LSM5   |
| YDR341C  |         | YEL030W | ECM10  | YER148W  | SPT15  |
| YDR342C  | HXT7    | YEL031W | SPF1   | YER149C  | PEA2   |
| YDR343C  | HXT6    | YEL032W | MCM3   | YER151C  | UBP3   |
| YDR353W  | TRR1    | YEL034W | HYP2   | YER154W  | OXA1   |
| YDR363W  | ESC2    | YEL040W | UTR2   | YER155C  | BEM2   |
| YDR363WA | SEM1    | YEL043W |        | YER160C  |        |
| YDR365C  | ESF1    | YEL044W | IES6   | YER169W  | RPH1   |
| YDR369C  | XRS2    | YEL054C | RPL12A | YER172C  | BRR2   |
| YDR373W  | FRQ1    | YEL055C | POL5   | YER173W  | RAD24  |
| YDR377W  | ATP17   | YEL056W | HAT2   | YER177W  | BMH1   |
| YDR380W  | ARO10   | YEL058W | PCM1   | YFL007W  | BLM10  |
| YDR381W  | YRA1    | YEL060C | PRB1   | YFL022C  | FRS2   |
| YDR385W  | EFT2    | YEL061C | CIN8   | YFL031W  | HAC1   |
| YDR388W  | RVS167  | YER005W | YND1   | YFL033C  | RIM15  |
| YDR389W  | SAC7    | YER006W | NUG1   | YFL034CB | MOB2   |
| YDR392W  | SPT3    | YER009W | NTF2   | YFL037W  | TUB2   |
| YDR394W  | RPT3    | YER016W | BIM1   | YFL039C  | ACT1   |
| YDR395W  | SXM1    | YER020W | GPA2   | YFL042C  |        |
| YDR398W  | UTP5    | YER021W | RPN3   | YFL045C  | SEC53  |
| YDR405W  | MRP20   | YER022W | SRB4   | YFR001W  | LOC1   |
| YDR410C  | STE14   | YER023W | PRO3   | YFR004W  | RPN11  |
| YDR412W  | RRP17   | YER025W | GCD11  | YFR005C  | SAD1   |
| YDR415C  |         | YER027C | GAL83  | YFR009W  | GCN20  |
| YDR418W  | RPL12B  | YER033C | ZRG8   | YFR010W  | UBP6   |
| YDR419W  | RAD30   | YER040W | GLN3   | YFR013W  | IOC3   |
| YDR427W  | RPN9    | YER042W | MXR1   | YFR017C  |        |
| YDR428C  | BNA7    | YER043C | SAH1   | YFR019W  | FAB1   |
| YDR436W  | PPZ2    | YER050C | RSM18  | YFR021W  | ATG18  |
| YDR440W  | DOT1    | YER052C | HOM3   | YFR028C  | CDC14  |
| YDR446W  | ECM11   | YER057C | HMF1   | YFR037C  | RSC8   |
| YDR448W  | ADA2    | YER062C | HOR2   | YFR040W  | SAP155 |
| YDR460W  | TFB3    | YER069W | ARG5,6 | YFR044C  | DUG1   |
| YDR462W  | MRPL28  | YER070W | RNR1   | YFR047C  | BNA6   |
| YDR485C  | VPS72   | YER082C | UTP7   | YFR051C  | RET2   |
| YDR490C  | PKH1    | YER083C | GET2   | YFR052W  | RPN12  |
| YDR496C  | PUF6    | YER088C | DOT6   | YFR053C  | HXK1   |
| YDR505C  | PSP1    | YER090W | TRP2   | YGL001C  | ERG26  |
| YDR507C  | GIN4    | YER091C | MET6   | YGL004C  | RPN14  |
| YGL008C  | PMA1    | YGL241W | KAP114 | YGR232W  | NAS6   |
| YGL009C  | LEU1    | YGL244W | RTF1   | YGR233C  | PHO81  |
| YGL014W  | PUF4    | YGL245W | GUS1   | YGR234W  | YHB1   |
| YGL016W  | KAP122  | YGL246C | RAI1   | YGR239C  | PEX21  |
| YGL019W  | CKB1    | YGL248W | PDE1   | YGR240C  | PFK1   |
| YGL020C  | GET1    | YGL251C | HFM1   | YGR244C  | LSC2   |
| YGL023C  | PIB2    | YGL252C | RTG2   | YGR245C  | SDA1   |
| YGL025C  | PGD1    | YGL255W | ZRT1   | YGR248W  | SOL4   |
| YGL026C  | TRP5    | YGR006W | PRP18  | YGR249W  | MGA1   |
| YGL027C  | CWH41   | YGR017W |        | YGR252W  | GCN5   |
| YGL035C  | MIG1    | YGR023W | MTL1   | YGR255C  | COQ6   |
| YGL037C  | PNC1    | YGR040W | KSS1   | YGR256W  | GND2   |
| YGL045W  | RIM8    | YGR060W | ERG25  | YGR260W  | TNA1   |
| YGL048C  | RPT6    | YGR061C | ADE6   | YGR262C  | BUD32  |
| YGL049C  | TIF4632 | YGR063C | SPT4   | YGR267C  | FOL2   |

|         |        |         |         |          |        |
|---------|--------|---------|---------|----------|--------|
| YGL054C | ERV14  | YGR066C |         | YGR282C  | BGL2   |
| YGL058W | RAD6   | YGR070W | ROM1    | YHL003C  | LAG1   |
| YGL064C | MRH4   | YGR076C | MRPL25  | YHL007C  | STE20  |
| YGL068W | MNP1   | YGR078C | PAC10   | YHL011C  | PRS3   |
| YGL071W | AFT1   | YGR083C | GCD2    | YHL030W  | ECM29  |
| YGL073W | HSF1   | YGR086C | PIL1    | YHL034C  | SBP1   |
| YGL080W |        | YGR087C | PDC6    | YHL048W  | COS8   |
| YGL084C | GUP1   | YGR090W | UTP22   | YHR001WA | QCR10  |
| YGL086W | MAD1   | YGR094W | VAS1    | YHR005C  | GPA1   |
| YGL099W | LSG1   | YGR100W | MDR1    | YHR008C  | SOD2   |
| YGL111W | NSA1   | YGR104C | SRB5    | YHR013C  | ARD1   |
| YGL115W | SNF4   | YGR108W | CLB1    | YHR014W  | SPO13  |
| YGL116W | CDC20  | YGR111W |         | YHR016C  | YSC84  |
| YGL120C | PRP43  | YGR113W | DAM1    | YHR020W  |        |
| YGL121C | GPG1   | YGR116W | SPT6    | YHR023W  | MYO1   |
| YGL127C | SOH1   | YGR121C | MEP1    | YHR031C  | RRM3   |
| YGL130W | CEG1   | YGR122W |         | YHR033W  |        |
| YGL131C | SNT2   | YGR130C |         | YHR039C  | MSC7   |
| YGL137W | SEC27  | YGR132C | PHB1    | YHR041C  | SRB2   |
| YGL153W | PEX14  | YGR133W | PEX4    | YHR042W  | NCP1   |
| YGL158W | RCK1   | YGR150C |         | YHR052W  | CIC1   |
| YGL163C | RAD54  | YGR152C | RSR1    | YHR053C  | CUP1-1 |
| YGL175C | SAE2   | YGR154C | GTO1    | YHR061C  | GIC1   |
| YGL178W | MPT5   | YGR155W | CYS4    | YHR064C  | SSZ1   |
| YGL179C | TOS3   | YGR159C | NSR1    | YHR074W  | QNS1   |
| YGL190C | CDC55  | YGR161C | RTS3    | YHR084W  | STE12  |
| YGL191W | COX13  | YGR162W | TIF4631 | YHR091C  | MSR1   |
| YGL193C |        | YGR170W | PSD2    | YHR098C  | SFB3   |
| YGL194C | HOS2   | YGR183C | QCR9    | YHR099W  | TRA1   |
| YGL195W | GCN1   | YGR192C | TDH3    | YHR102W  | KIC1   |
| YGL197W | MDS3   | YGR194C | XKS1    | YHR104W  | GRE3   |
| YGL201C | MCM6   | YGR196C | FYV8    | YHR106W  | TRR2   |
| YGL207W | SPT16  | YGR200C | ELP2    | YHR110W  | ERP5   |
| YGL208W | SIP2   | YGR202C | PCT1    | YHR112C  |        |
| YGL234W | ADE5,7 | YGR214W | RPS0A   | YHR114W  | BZZ1   |
| YGL236C | MTO1   | YGR220C | MRPL9   | YHR115C  | DMA1   |
| YGL238W | CSE1   | YGR229C | SMI1    | YHR118C  | ORC6   |
| YGL240W | DOC1   | YGR231C | PHB2    | YHR119W  | SET1   |
| YHR128W | FUR1   | YIL142W | CCT2    | YJR007W  | SUI2   |
| YHR129C | ARP1   | YIL143C | SSL2    | YJR010CA | SPC1   |
| YHR135C | YCK1   | YIL147C | SLN1    | YJR016C  | ILV3   |
| YHR142W | CHS7   | YIL150C | MCM10   | YJR017C  | ESS1   |
| YHR149C | SKG6   | YIL153W | RRD1    | YJR025C  | BNA1   |
| YHR152W | SPO12  | YIL156W | UBP7    | YJR027W  |        |
| YHR158C | KEL1   | YIL159W | BNR1    | YJR028W  |        |
| YHR165C | PRP8   | YIR002C | MPH1    | YJR032W  | CPR7   |
| YHR166C | CDC23  | YIR019C | MUC1    | YJR035W  | RAD26  |
| YHR169W | DBP8   | YIR023W | DAL81   | YJR042W  | NUP85  |
| YHR170W | NMD3   | YIR038C | GTT1    | YJR043C  | POL32  |
| YHR174W | ENO2   | YJL003W | COX16   | YJR046W  | TAH11  |
| YHR179W | OYE2   | YJL005W | CYR1    | YJR048W  | CYC1   |
| YHR183W | GND1   | YJL008C | CCT8    | YJR049C  | UTR1   |
| YHR186C | KOG1   | YJL014W | CCT3    | YJR053W  | BFA1   |
| YHR187W | IKI1   | YJL015C |         | YJR057W  | CDC8   |

|         |        |         |        |         |        |
|---------|--------|---------|--------|---------|--------|
| YHR191C | CTF8   | YJL016W |        | YJR065C | ARP3   |
| YHR193C | EGD2   | YJL020C | BBC1   | YJR066W | TOR1   |
| YHR194W | MDM31  | YJL023C | PET130 | YJR067C | YAE1   |
| YHR200W | RPN10  | YJL026W | RNR2   | YJR068W | RFC2   |
| YHR205W | SCH9   | YJL030W | MAD2   | YJR072C | NPA3   |
| YHR206W | SKN7   | YJL033W | HCA4   | YJR073C | OPI3   |
| YIL002C | INP51  | YJL052W | TDH1   | YJR075W | HOC1   |
| YIL004C | BET1   | YJL063C | MRPL8  | YJR076C | CDC11  |
| YIL020C | HIS6   | YJL076W | NET1   | YJR077C | MIR1   |
| YIL026C | IRR1   | YJL080C | SCP160 | YJR078W | BNA2   |
| YIL028W |        | YJL089W | SIP4   | YJR079W |        |
| YIL033C | BCY1   | YJL092W | SRS2   | YJR083C | ACF4   |
| YIL035C | CKA1   | YJL095W | BCK1   | YJR090C | GRR1   |
| YIL037C | PRM2   | YJL098W | SAP185 | YJR091C | JSN1   |
| YIL038C | NOT3   | YJL106W | IME2   | YJR094C | IME1   |
| YIL043C | CBR1   | YJL109C | UTP10  | YJR104C | SOD1   |
| YIL049W | DFG10  | YJL110C | GZF3   | YJR109C | CPA2   |
| YIL051C | MMF1   | YJL114W |        | YJR112W | NNF1   |
| YIL053W | RHR2   | YJL115W | ASF1   | YJR117W | STE24  |
| YIL061C | SNP1   | YJL116C | NCA3   | YJR118C | ILM1   |
| YIL069C | RPS24B | YJL122W | ALB1   | YJR130C | STR2   |
| YIL075C | RPN2   | YJL123C |        | YJR134C | SGM1   |
| YIL076W | SEC28  | YJL125C | GCD14  | YJR135C | MCM22  |
| YIL078W | THS1   | YJL128C | PBS2   | YJR138W | IML1   |
| YIL084C | SDS3   | YJL129C | TRK1   | YJR140C | HIR3   |
| YIL094C | LYS12  | YJL130C | URA2   | YJR144W | MGM101 |
| YIL095W | PRK1   | YJL138C | TIF2   | YJR145C | RPS4A  |
| YIL106W | MOB1   | YJL140W | RPB4   | YJR152W | DAL5   |
| YIL112W | HOS4   | YJL141C | YAK1   | YKL003C | MRP17  |
| YIL119C | RPI1   | YJL143W | TIM17  | YKL008C | LAC1   |
| YIL123W | SIM1   | YJL153C | INO1   | YKL010C | UFD4   |
| YIL125W | KGD1   | YJL164C | TPK1   | YKL014C | URB1   |
| YIL126W | STH1   | YJL168C | SET2   | YKL015W | PUT3   |
| YIL128W | MET18  | YJL176C | SWI3   | YKL016C | ATP7   |
| YIL129C | TAO3   | YJL187C | SWE1   | YKL038W | RGT1   |
| YIL131C | FKH1   | YJL197W | UBP12  | YKL043W | PHD1   |
| YIL136W | OM45   | YJL207C | LAA1   | YKL048C | ELM1   |
| YKL049C | CSE4   | YKR039W | GAP1   | YLR178C | TFS1   |
| YKL052C | ASK1   | YKR042W | UTH1   | YLR180W | SAM1   |
| YKL056C | TMA19  | YKR043C |        | YLR182W | SWI6   |
| YKL059C | MPE1   | YKR048C | NAP1   | YLR189C | ATG26  |
| YKL060C | FBA1   | YKR056W | TRM2   | YLR191W | PEX13  |
| YKL062W | MSN4   | YKR067W | GPT2   | YLR197W | SIK1   |
| YKL063C |        | YKR085C | MRPL20 | YLR200W | YKE2   |
| YKL067W | YNK1   | YKR096W |        | YLR210W | CLB4   |
| YKL071W |        | YKR101W | SIR1   | YLR215C | CDC123 |
| YKL073W | LHS1   | YLL013C | PUF3   | YLR216C | CPR6   |
| YKL080W | VMA5   | YLL016W |        | YLR223C | IFH1   |
| YKL081W | TEF4   | YLL021W | SPA2   | YLR229C | CDC42  |
| YKL085W | MDH1   | YLL024C | SSA2   | YLR231C | BNA5   |
| YKL087C | CYT2   | YLL026W | HSP104 | YLR233C | EST1   |
| YKL093W | MBR1   | YLL028W | TPO1   | YLR238W | FAR10  |
| YKL095W | YJU2   | YLL031C | GPI13  | YLR246W | ERF2   |
| YKL101W | HSL1   | YLL033W | IRC19  | YLR249W | YEF3   |

|         |        |       |         |        |          |        |
|---------|--------|-------|---------|--------|----------|--------|
| YKL104C | GFA1   |       | YLL039C | UBI4   | YLR258W  | GSY2   |
| YKL109W | HAP4   |       | YLL040C | VPS13  | YLR259C  | HSP60  |
| YKL112W | ABF1   |       | YLL050C | COF1   | YLR262C  | YPT6   |
| YKL113C | RAD27  |       | YLL060C | GTT2   | YLR265C  | NEJ1   |
| YKL119C | VPH2   |       | YLR006C | SSK1   | YLR274W  | MCM5   |
| YKL127W | PGM1   |       | YLR022C | SDO1   | YLR278C  |        |
| YKL134C |        | 1-Oct | YLR027C | AAT2   | YLR285W  | NNT1   |
| YKL135C | APL2   |       | YLR039C | RIC1   | YLR286C  | CTS1   |
| YKL139W | CTK1   |       | YLR044C | PDC1   | YLR287CA | RPS30A |
| YKL140W | TGL1   |       | YLR048W | RPS0B  | YLR291C  | GCD7   |
| YKL143W | LTV1   |       | YLR053C |        | YLR292C  | SEC72  |
| YKL145W | RPT1   |       | YLR055C | SPT8   | YLR294C  |        |
| YKL149C | DBR1   |       | YLR059C | REX2   | YLR296W  |        |
| YKL150W | MCR1   |       | YLR074C | BUD20  | YLR303W  | MET17  |
| YKL152C | GPM1   |       | YLR079W | SIC1   | YLR304C  | ACO1   |
| YKL155C | RSM22  |       | YLR080W | EMP46  | YLR306W  | UBC12  |
| YKL165C | MCD4   |       | YLR085C | ARP6   | YLR310C  | CDC25  |
| YKL166C | TPK3   |       | YLR086W | SMC4   | YLR313C  | SPH1   |
| YKL167C | MRP49  |       | YLR095C | IOC2   | YLR320W  | MMS22  |
| YKL180W | RPL17A |       | YLR103C | CDC45  | YLR324W  | PEX30  |
| YKL182W | FAS1   |       | YLR106C | MDN1   | YLR332W  | MID2   |
| YKL185W | ASH1   |       | YLR109W | AHP1   | YLR342W  | FKS1   |
| YKL189W | HYM1   |       | YLR113W | HOG1   | YLR347C  | KAP95  |
| YKL190W | CNB1   |       | YLR116W | MSL5   | YLR350W  | ORM2   |
| YKL193C | SDS22  |       | YLR117C | CLF1   | YLR353W  | BUD8   |
| YKL195W | MIA40  |       | YLR120C | YPS1   | YLR355C  | ILV5   |
| YKL203C | TOR2   |       | YLR131C | ACE2   | YLR362W  | STE11  |
| YKL204W | EAP1   |       | YLR133W | CKI1   | YLR370C  | ARC18  |
| YKL210W | UBA1   |       | YLR134W | PDC5   | YLR371W  | ROM2   |
| YKL217W | JEN1   |       | YLR135W | SLX4   | YLR372W  | SUR4   |
| YKL218C | SRY1   |       | YLR143W |        | YLR384C  | IKI3   |
| YKR006C | MRPL13 |       | YLR169W |        | YLR386W  | VAC14  |
| YKR008W | RSC4   |       | YLR171W |        | YLR387C  | REH1   |
| YKR026C | GCN3   |       | YLR174W | IDP2   | YLR396C  | VPS33  |
| YKR029C | SET3   |       | YLR175W | CBF5   | YLR398C  | SKI2   |
| YKR034W | DAL80  |       | YLR177W |        | YLR403W  | SFP1   |
| YLR406C | RPL31B |       | YMR012W | CLU1   | YMR238W  | DFG5   |
| YLR410W | VIP1   |       | YMR016C | SOK2   | YMR242C  | RPL20A |
| YLR417W | VPS36  |       | YMR026C | PEX12  | YMR246W  | FAA4   |
| YLR418C | CDC73  |       | YMR028W | TAP42  | YMR250W  | GAD1   |
| YLR421C | RPN13  |       | YMR029C | FAR8   | YMR255W  | GFD1   |
| YLR425W | TUS1   |       | YMR037C | MSN2   | YMR256C  | COX7   |
| YLR429W | CRN1   |       | YMR039C | SUB1   | YMR260C  | TIF11  |
| YLR438W | CAR2   |       | YMR042W | ARG80  | YMR261C  | TPS3   |
| YLR440C | SEC39  |       | YMR047C | NUP116 | YMR263W  | SAP30  |
| YLR442C | SIR3   |       | YMR048W | CSM3   | YMR266W  | RSN1   |
| YLR447C | VMA6   |       | YMR049C | ERB1   | YMR267W  | PPA2   |
| YLR448W | RPL6B  |       | YMR052W | FAR3   | YMR268C  | PRP24  |
| YLR452C | SST2   |       | YMR059W | SEN15  | YMR270C  | RRN9   |
| YLR453C | RIF2   |       | YMR061W | RNA14  | YMR272C  | SCS7   |
| YLR463C |        |       | YMR068W | AVO2   | YMR273C  | ZDS1   |
| YLR465C | BSC3   |       | YMR072W | ABF2   | YMR274C  | RCE1   |
| YLR467W | YRF1-5 |       | YMR074C |        | YMR277W  | FCP1   |
| YML006C | GIS4   |       | YMR075W | RCO1   | YMR280C  | CAT8   |

|         |        |         |        |         |        |
|---------|--------|---------|--------|---------|--------|
| YML007W | YAP1   | YMR077C | VPS20  | YMR284W | YKU70  |
| YML008C | ERG6   | YMR078C | CTF18  | YMR285C | NGL2   |
| YML009C | MRPL39 | YMR081C | ISF1   | YMR290C | HAS1   |
| YML010W | SPT5   | YMR086W |        | YMR291W |        |
| YML011C | RAD33  | YMR092C | AIP1   | YMR293C |        |
| YML017W | PSP2   | YMR097C | MTG1   | YMR294W | JNM1   |
| YML025C | YML6   | YMR105C | PGM2   | YMR298W | LIP1   |
| YML028W | TSA1   | YMR106C | YKU80  | YMR303C | ADH2   |
| YML032C | RAD52  | YMR109W | MYO5   | YMR304W | UBP15  |
| YML041C | VPS71  | YMR125W | STO1   | YMR307W | GAS1   |
| YML046W | PRP39  | YMR127C | SAS2   | YMR312W | ELP6   |
| YML048W | GSF2   | YMR128W | ECM16  | YMR319C | FET4   |
| YML049C | RSE1   | YMR139W | RIM11  | YNL002C | RLP7   |
| YML054C | CYB2   | YMR144W |        | YNL004W | HRB1   |
| YML057W | CMP2   | YMR149W | SWP1   | YNL005C | MRP7   |
| YML059C | NTE1   | YMR153W | NUP53  | YNL006W | LST8   |
| YML064C | TEM1   | YMR154C | RIM13  | YNL007C | SIS1   |
| YML065W | ORC1   | YMR163C | INP2   | YNL009W | IDP3   |
| YML069W | POB3   | YMR164C | MSS11  | YNL014W | HEF3   |
| YML073C | RPL6A  | YMR172W | HOT1   | YNL021W | HDA1   |
| YML074C | FPR3   | YMR175W | SIP18  | YNL025C | SSN8   |
| YML078W | CPR3   | YMR182C | RGM1   | YNL027W | CRZ1   |
| YML085C | TUB1   | YMR186W | HSC82  | YNL030W | HHF2   |
| YML087C |        | YMR190C | SGS1   | YNL037C | IDH1   |
| YML089C |        | YMR193W | MRPL24 | YNL038W | GPI15  |
| YML091C | RPM2   | YMR194W | RPL36A | YNL055C | POR1   |
| YML094W | GIM5   | YMR198W | CIK1   | YNL061W | NOP2   |
| YML098W | TAF13  | YMR200W | ROT1   | YNL063W | MTQ1   |
| YML099C | ARG81  | YMR219W | ESC1   | YNL064C | YDJ1   |
| YML100W | TSL1   | YMR224C | MRE11  | YNL066W | SUN4   |
| YML109W | ZDS2   | YMR225C | MRPL44 | YNL073W | MSK1   |
| YML110C | COQ5   | YMR226C |        | YNL076W | MKS1   |
| YML126C | ERG13  | YMR227C | TAF7   | YNL079C | TPM1   |
| YML128C | MSC1   | YMR228W | MTF1   | YNL085W | MKT1   |
| YMR011W | HXT2   | YMR229C | RRP5   | YNL088W | TOP2   |
| YNL090W | RHO2   | YNL271C | BNI1   | YOL110W | SHR5   |
| YNL093W | YPT53  | YNL273W | TOF1   | YOL115W | PAP2   |
| YNL097C | PHO23  | YNL280C | ERG24  | YOL121C | RPS19A |
| YNL098C | RAS2   | YNL283C | WSC2   | YOL130W | ALR1   |
| YNL101W | AVT4   | YNL284C | MRPL10 | YOL139C | CDC33  |
| YNL102W | POL1   | YNL289W | PCL1   | YOL148C | SPT20  |
| YNL107W | YAF9   | YNL290W | RFC3   | YOL149W | DCP1   |
| YNL110C | NOP15  | YNL298W | CLA4   | YOL151W | GRE2   |
| YNL113W | RPC19  | YNL302C | RPS19B | YOL156W | HXT11  |
| YNL116W | DMA2   | YNL304W | YPT11  | YOR007C | SGT2   |
| YNL118C | DCP2   | YNL307C | MCK1   | YOR008C | SLG1   |
| YNL123W | NMA111 | YNL308C | KRI1   | YOR014W | RTS1   |
| YNL124W | NAF1   | YNL309W | STB1   | YOR018W | ROD1   |
| YNL127W | FAR11  | YNL314W | DAL82  | YOR026W | BUB3   |
| YNL129W | NRK1   | YNL327W | EGT2   | YOR027W | STI1   |
| YNL131W | TOM22  | YNL329C | PEX6   | YOR028C | CIN5   |
| YNL132W | KRE33  | YNL334C | SNO2   | YOR030W | DFG16  |
| YNL135C | FPR1   | YNL337W |        | YOR032C | HMS1   |
| YNL138W | SRV2   | YNL338W |        | YOR038C | HIR2   |



|         |        |          |        |         |        |
|---------|--------|----------|--------|---------|--------|
| YNL139C | THO2   | YNL339C  | YRF1-6 | YOR039W | CKB2   |
| YNL142W | MEP2   | YNR001C  | CIT1   | YOR041C |        |
| YNL145W | MFA2   | YNR003C  | RPC34  | YOR043W | WHI2   |
| YNL151C | RPC31  | YNR008W  | LRO1   | YOR046C | DBP5   |
| YNL153C | GIM3   | YNR016C  | ACC1   | YOR047C | STD1   |
| YNL154C | YCK2   | YNR023W  | SNF12  | YOR052C |        |
| YNL167C | SKO1   | YNR035C  | ARC35  | YOR057W | SGT1   |
| YNL172W | APC1   | YNR037C  | RSM19  | YOR061W | CKA2   |
| YNL175C | NOP13  | YNR050C  | LYS9   | YOR064C | YNG1   |
| YNL183C | NPR1   | YNR051C  | BRE5   | YOR070C | GYP1   |
| YNL186W | UBP10  | YNR052C  | POP2   | YOR074C | CDC21  |
| YNL187W |        | YNR053C  | NOG2   | YOR080W | DIA2   |
| YNL189W | SRP1   | YNR065C  |        | YOR089C | VPS21  |
| YNL192W | CHS1   | YOL004W  | SIN3   | YOR092W | ECM3   |
| YNL197C | WHI3   | YOL006C  | TOP1   | YOR098C | NUP1   |
| YNL199C | GCR2   | YOL012C  | HTZ1   | YOR101W | RAS1   |
| YNL201C | PSY2   | YOL017W  | ESC8   | YOR107W | RGS2   |
| YNL204C | SPS18  | YOL025W  | LAG2   | YOR116C | RPO31  |
| YNL206C | RTT106 | YOL026C  | MIM1   | YOR117W | RPT5   |
| YNL207W | RIO2   | YOL041C  | NOP12  | YOR122C | PFY1   |
| YNL214W | PEX17  | YOL044W  | PEX15  | YOR133W | EFT1   |
| YNL216W | RAP1   | YOL051W  | GAL11  | YOR135C | IRC14  |
| YNL229C | URE2   | YOL061W  | PRS5   | YOR136W | IDH2   |
| YNL233W | BNI4   | YOL067C  | RTG1   | YOR140W | SFL1   |
| YNL236W | SIN4   | YOL068C  | HST1   | YOR142W | LSC1   |
| YNL239W | LAP3   | YOL077C  | BRX1   | YOR144C | ELG1   |
| YNL248C | RPA49  | YOL078W  | AVO1   | YOR149C | SMP3   |
| YNL250W | RAD50  | YOL081W  | IRA2   | YOR150W | MRPL23 |
| YNL251C | NRD1   | YOL086C  | ADH1   | YOR156C | NFI1   |
| YNL252C | MRPL17 | YOL094C  | RFC4   | YOR174W | MED4   |
| YNL259C | ATX1   | YOL097C  | WRS1   | YOR177C | MPC54  |
| YNL261W | ORC5   | YOL107W  |        | YOR181W | LAS17  |
| YNL262W | POL2   | YOL108C  | INO4   | YOR191W | ULS1   |
| YNL264C | PDR17  | YOL109W  | ZEO1   | YOR198C | BFR1   |
| YOR199W |        | YPL042C  | SSN3   | YPL256C | CLN2   |
| YOR201C | MRM1   | YPL043W  | NOP4   | YPL258C | THI21  |
| YOR202W | HIS3   | YPL045W  | VPS16  | YPL259C | APM1   |
| YOR207C | RET1   | YPL046C  | ELC1   | YPL266W | DIM1   |
| YOR209C | NPT1   | YPL048W  | CAM1   | YPL268W | PLC1   |
| YOR210W | RPB10  | YPL049C  | DIG1   | YPL271W | ATP15  |
| YOR212W | STE4   | YPL055C  | LGE1   | YPR009W | SUT2   |
| YOR213C | SAS5   | YPL059W  | GRX5   | YPR010C | RPA135 |
| YOR215C |        | YPL061W  | ALD6   | YPR016C | TIF6   |
| YOR217W | RFC1   | YPL066W  |        | YPR018W | RLF2   |
| YOR224C | RPB8   | YPL075W  | GCR1   | YPR019W | MCM4   |
| YOR230W | WTM1   | YPL076W  | GPI2   | YPR020W | ATP20  |
| YOR232W | MGE1   | YPL078C  | ATP4   | YPR023C | EAF3   |
| YOR238W |        | YPL083C  | SEN54  | YPR025C | CCL1   |
| YOR239W | ABP140 | YPL085W  | SEC16  | YPR030W | CSR2   |
| YOR244W | ESA1   | YPL086C  | ELP3   | YPR031W | NTO1   |
| YOR245C | DGA1   | YPL087W  | YDC1   | YPR033C | HTS1   |
| YOR249C | APC5   | YPL093W  | NOG1   | YPR034W | ARP7   |
| YOR257W | CDC31  | YPL096CA | ERI1   | YPR035W | GLN1   |
| YOR259C | RPT4   | YPL100W  | ATG21  | YPR046W | MCM16  |

|         |        |         |        |          |        |
|---------|--------|---------|--------|----------|--------|
| YOR261C | RPN8   | YPL101W | ELP4   | YPR067W  | ISA2   |
| YOR267C | HRK1   | YPL104W | MSD1   | YPR069C  | SPE3   |
| YOR272W | YTM1   | YPL106C | SSE1   | YPR072W  | NOT5   |
| YOR290C | SNF2   | YPL115C | BEM3   | YPR080W  | TEF1   |
| YOR299W | BUD7   | YPL126W | NAN1   | YPR100W  | MRPL51 |
| YOR304W | ISW2   | YPL129W | TAF14  | YPR101W  | SNT309 |
| YOR310C | NOP58  | YPL139C | UME1   | YPR104C  | FHL1   |
| YOR312C | RPL20B | YPL143W | RPL33A | YPR108W  | RPN7   |
| YOR317W | FAA1   | YPL151C | PRP46  | YPR110C  | RPC40  |
| YOR326W | MYO2   | YPL152W | RRD2   | YPR111W  | DBF20  |
| YOR332W | VMA4   | YPL153C | RAD53  | YPR119W  | CLB2   |
| YOR335C | ALA1   | YPL160W | CDC60  | YPR120C  | CLB5   |
| YOR341W | RPA190 | YPL161C | BEM4   | YPR121W  | THI22  |
| YOR349W | CIN1   | YPL169C | MEX67  | YPR122W  | AXL1   |
| YOR358W | HAP5   | YPL171C | OYE3   | YPR129W  | SCD6   |
| YOR360C | PDE2   | YPL173W | MRPL40 | YPR133WA | TOM5   |
| YOR361C | PRT1   | YPL174C | NIP100 | YPR135W  | CTF4   |
| YOR367W | SCP1   | YPL178W | CBC2   | YPR138C  | MEP3   |
| YOR368W | RAD17  | YPL180W | TCO89  | YPR141C  | KAR3   |
| YOR371C | GPB1   | YPL181W | CTI6   | YPR143W  | RRP15  |
| YOR383C | FIT3   | YPL194W | DDC1   | YPR160W  | GPH1   |
| YPL001W | HAT1   | YPL203W | TPK2   | YPR161C  | SGV1   |
| YPL004C | LSP1   | YPL204W | HRR25  | YPR163C  | TIF3   |
| YPL011C | TAF3   | YPL209C | IPL1   | YPR164W  | MMS1   |
| YPL012W | RRP12  | YPL218W | SAR1   | YPR165W  | RHO1   |
| YPL016W | SWI1   | YPL225W |        | YPR167C  | MET16  |
| YPL017C | IRC15  | YPL226W | NEW1   | YPR169W  | JIP5   |
| YPL028W | ERG10  | YPL232W | SSO1   | YPR179C  | HDA3   |
| YPL031C | PHO85  | YPL235W | RVB2   | YPR181C  | SEC23  |
| YPL032C | SVL3   | YPL237W | SUI3   | YPR183W  | DPM1   |
| YPL036W | PMA2   | YPL240C | HSP82  | YPR187W  | RPO26  |
| YPL037C | EGD1   | YPL248C | GAL4   | YPR190C  | RPC82  |
| YPL038W | MET31  | YPL252C | YAH1   | YPR191W  | QCR2   |
